# Supplementary material for: Prevalence of substance and hazardous alcohol use and their association with risky sexual behaviour among youth: findings from a population-based survey in Zimbabwe
Source: PubMed Central journal article supplement (PMC11184200; doi:10.1136/bmjopen-2023-080993), 2024-06-16
Supplement: bmjopen-2023-080993.draft_revisions.pdf [file bmjopen-2023-080993.draft_revisions.pdf]

# BMJ Open

BMJ Open is committed to open peer review. As part of this commitment we make the peer review history of every article we publish publicly available.

When an article is published we post the peer reviewers' comments and the authors' responses online. We also post the versions of the paper that were used during peer review. These are the versions that the peer review comments apply to.

The versions of the paper that follow are the versions that were submitted during the peer review process. They are not the versions of record or the final published versions. They should not be cited or distributed as the published version of this manuscript.

BMJ Open is an open access journal and the full, final, typeset and author-corrected version of record of the manuscript is available on our site with no access controls, subscription charges or pay-per-view fees (<http://bmjopen.bmj.com>).

If you have any questions on BMJ Open's open peer review process please email [info.bmjopen@bmj.com](mailto:info.bmjopen@bmj.com)

# BMJ Open

## Prevalence of substance and hazardous alcohol use and their association with risky sexual behaviour among youth: findings from a population-based survey in Zimbabwe

|                               |                                                                                                                                                                                                                                                                                                                                                                                                                                                                                                                                                                                                                                                                                                                                                                                                                                                                                                                                                                                                                                                                                                                                                                                           |
|-------------------------------|-------------------------------------------------------------------------------------------------------------------------------------------------------------------------------------------------------------------------------------------------------------------------------------------------------------------------------------------------------------------------------------------------------------------------------------------------------------------------------------------------------------------------------------------------------------------------------------------------------------------------------------------------------------------------------------------------------------------------------------------------------------------------------------------------------------------------------------------------------------------------------------------------------------------------------------------------------------------------------------------------------------------------------------------------------------------------------------------------------------------------------------------------------------------------------------------|
| Journal:                      | <i>BMJ Open</i>                                                                                                                                                                                                                                                                                                                                                                                                                                                                                                                                                                                                                                                                                                                                                                                                                                                                                                                                                                                                                                                                                                                                                                           |
| Manuscript ID                 | bmjopen-2023-080993                                                                                                                                                                                                                                                                                                                                                                                                                                                                                                                                                                                                                                                                                                                                                                                                                                                                                                                                                                                                                                                                                                                                                                       |
| Article Type:                 | Original research                                                                                                                                                                                                                                                                                                                                                                                                                                                                                                                                                                                                                                                                                                                                                                                                                                                                                                                                                                                                                                                                                                                                                                         |
| Date Submitted by the Author: | 17-Oct-2023                                                                                                                                                                                                                                                                                                                                                                                                                                                                                                                                                                                                                                                                                                                                                                                                                                                                                                                                                                                                                                                                                                                                                                               |
| Complete List of Authors:     | HLAHLA, KUDZAI; Biomedical Research and Training Institute; University of Zimbabwe Faculty of Medicine and Health Sciences<br>Azizi, Steven Chifundo; Biomedical Research and Training Institute; London School of Hygiene & Tropical Medicine<br>Simms, Victoria; Biomedical Research and Training Institute; London School of Hygiene & Tropical Medicine<br>Dziva Chikwari, Chido; Biomedical Research and Training Institute; London School of Hygiene & Tropical Medicine<br>Dauya, E; Biomedical Research and Training Institute<br>Bandason , Tsitsi; Biomedical Research and Training Institute<br>Tembo, Mandikudza ; Biomedical Research and Training Institute; London School of Hygiene & Tropical Medicine<br>Mavodza, Constanca ; Biomedical Research and Training Institute; London School of Hygiene & Tropical Medicine, Department of Public Health, Environments and Society<br>Kranzer, Katharina; Biomedical Research and Training Institute; London School of Hygiene & Tropical Medicine, Clinical Research Department<br>Ferrand, Rashida; Biomedical Research and Training Institute; London School of Hygiene & Tropical Medicine, Clinical Research Department |
| Keywords:                     | Adolescents < Adolescent, Behavior, HIV & AIDS < INFECTIOUS DISEASES, Substance misuse < PSYCHIATRY, Risk Factors                                                                                                                                                                                                                                                                                                                                                                                                                                                                                                                                                                                                                                                                                                                                                                                                                                                                                                                                                                                                                                                                         |
|                               |                                                                                                                                                                                                                                                                                                                                                                                                                                                                                                                                                                                                                                                                                                                                                                                                                                                                                                                                                                                                                                                                                                                                                                                           |

SCHOLARONE™  
Manuscripts

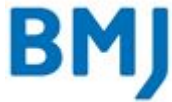

I, the Submitting Author has the right to grant and does grant on behalf of all authors of the Work (as defined in the below author licence), an exclusive licence and/or a non-exclusive licence for contributions from authors who are: i) UK Crown employees; ii) where BMJ has agreed a CC-BY licence shall apply, and/or iii) in accordance with the terms applicable for US Federal Government officers or employees acting as part of their official duties; on a worldwide, perpetual, irrevocable, royalty-free basis to BMJ Publishing Group Ltd ("BMJ") its licensees and where the relevant Journal is co-owned by BMJ to the co-owners of the Journal, to publish the Work in this journal and any other BMJ products and to exploit all rights, as set out in our [licence](#).

The Submitting Author accepts and understands that any supply made under these terms is made by BMJ to the Submitting Author unless you are acting as an employee on behalf of your employer or a postgraduate student of an affiliated institution which is paying any applicable article publishing charge ("APC") for Open Access articles. Where the Submitting Author wishes to make the Work available on an Open Access basis (and intends to pay the relevant APC), the terms of reuse of such Open Access shall be governed by a Creative Commons licence – details of these licences and which [Creative Commons](#) licence will apply to this Work are set out in our licence referred to above.

Other than as permitted in any relevant BMJ Author's Self Archiving Policies, I confirm this Work has not been accepted for publication elsewhere, is not being considered for publication elsewhere and does not duplicate material already published. I confirm all authors consent to publication of this Work and authorise the granting of this licence.

1  
2  
3  
4  
5  
6  
7  
8  
9

## Prevalence of substance and hazardous alcohol use and their association with risky sexual behaviour among youth: findings from a population-based survey in Zimbabwe

10 Kudzai Hlahla<sup>1,2</sup>, Steven Chifundo Azizi<sup>1,3</sup>, Victoria Simms<sup>1,3</sup>, Chido Dziva Chikwari<sup>1,3</sup>, Ethel Dauya<sup>1</sup>, Tsitsi Bandason<sup>1</sup>, Mandikudza Tembo<sup>1,3</sup>, Constanica Vimbayi Mavodza<sup>1,4</sup>, Katharina Kranzer<sup>1,5,6</sup>, Rashida Abbas Ferrand<sup>1,5</sup>

- 14
- 15 1. Biomedical Research and Training Institute, Harare, Zimbabwe
  - 16 2. Clinical Trials Research Centre, University of Zimbabwe Faculty of Medicine and Health Sciences, Harare Zimbabwe
  - 17 3. MRC International Statistics and Epidemiology Group, London School of Hygiene & Tropical Medicine, London, UK
  - 18 4. Department of Public Health, Environments and Society, Faculty of Public Health and Policy, London School of Hygiene & Tropical Medicine, London, UK
  - 19 5. Clinical Research Department, London School of Hygiene & Tropical Medicine, London, UK
  - 20 6. Division of Infectious Diseases and Tropical Medicine, Medical Center of the University of Munich, Munich, Germany
- 21  
22  
23  
24  
25  
26  
27  
28

### Email addresses of authors:

29 Kudzai Hlahla: [khlahla@uz-ctrc.org](mailto:khlahla@uz-ctrc.org)

30 Steven Azizi: [Steven.Azizi1@student.lshhtm.ac.uk](mailto:Steven.Azizi1@student.lshhtm.ac.uk)

31 Victoria Simms: [Victoria.simms@lshhtm.ac.uk](mailto:Victoria.simms@lshhtm.ac.uk)

32 Chido Dziva Chikwari: [Chido.DzivaChikwari@lshhtm.ac.uk](mailto:Chido.DzivaChikwari@lshhtm.ac.uk)

33 Ethel Dauya: [edauya@brti.co.zw](mailto:edauya@brti.co.zw)

34 Tsitsi Bandason: [tbandason@brti.co.zw](mailto:tbandason@brti.co.zw)

35 Mandikudza Tembo: [Mandikudza.Tembo@lshhtm.ac.uk](mailto:Mandikudza.Tembo@lshhtm.ac.uk)

36 Constanica Mavodza: [Constancia-Vimbayi.Mavodza@lshhtm.ac.uk](mailto:Constancia-Vimbayi.Mavodza@lshhtm.ac.uk)

37 Katharina Kranzer: [katharina.kranzer@lshhtm.ac.uk](mailto:katharina.kranzer@lshhtm.ac.uk)

38 Rashida Ferrand: [Rashida.Ferrand@lshhtm.ac.uk](mailto:Rashida.Ferrand@lshhtm.ac.uk)

39  
40  
41  
42  
43

### § Corresponding Author:

44 Rashida Ferrand

45 Biomedical Research and Training Institute

46 10, Seagrave Road,

47 Harare,

48 Zimbabwe

49 Email: [Rashida.Ferrand@lshhtm.ac.uk](mailto:Rashida.Ferrand@lshhtm.ac.uk)

50  
51  
52  
53  
54  
55  
56  
57  
58  
59  
60

## ABSTRACT

### Introduction

Hazardous drinking (HD) and substance use (SU) can lead to disinhibited behaviour and are both growing public health problems among Southern African youths. We investigated the prevalence of SU and HD and their association with risky sexual behaviour among youth in Zimbabwe.

### Methods

A population-based survey of youth aged 18-24 years in three provinces in Zimbabwe was conducted between October 2021 and June 2022. A questionnaire collected data on HD (defined as an AUDIT score  $\geq 8$ ), ever use of substances, and sexual behaviour. Multi-level mixed effects generalized linear modelling was used to determine associations between SU/HD and risky sexual behaviour.

### Results

Of 17585 participants eligible for this analysis, 61% were female and the median age was 20 (IQR:19, 22) years. Overall, 4.5% and 7.0% of participants reported HD and SU respectively. Males had a substantially higher prevalence than females of HD (8.2% vs 1.9%) and SU (15.1% vs 1.5%). Among males, after adjusting for socio-demographic factors, we found increased odds of having >1 sexual partner in those who engaged in SU (aOR=2.67, 95%CI=2.21-3.22), HD (aOR=3.40, 95%CI=2.71-4.26) and concurrent HD and SU (aOR=4.57, 95% CI=3.59-5.81) compared to those who did not engage in HD or SU. Similarly, there was increased odds of receiving/providing transactional sex among males who engaged in SU (aOR=2.51, 95%CI=1.68-3.74), HD (aOR=3.60, 95%CI=2.24-5.79), and concurrent HD and SU (aOR=7.74, 95%CI=5.44-11.0). Substance use was associated with 22% increased odds of inconsistent

1  
2  
3 condom use in males (aOR=1.22, 95% CI=1.03-1.47). In females, the odds of having >1 sexual  
4  
5 partner and having transactional sex were also increased amongst those who engaged in SU  
6  
7 and HD.  
8  
9

## 10 **Conclusions**

11  
12 SU and HD are associated with sexual behaviours that increase the risk of HIV acquisition in  
13  
14 youth. Sexual and reproductive health interventions must consider HD and SU as potential  
15  
16 drivers of risky sexual behaviour in youths.  
17  
18  
19  
20  
21  
22

23 **Keywords: Substance use, hazardous alcohol, youth, HIV, Africa, sexual behavior**  
24  
25  
26  
27  
28  
29  
30  
31  
32  
33  
34  
35  
36  
37  
38  
39  
40  
41  
42  
43  
44  
45  
46  
47  
48  
49  
50  
51  
52  
53  
54  
55  
56  
57  
58  
59  
60

## KEY MESSAGING

**What is already known on this topic** – Hazardous drinking (HD) and substance use (SU) is increasing in the African continent. HD and SU are prevalent among youth and may alter health behaviour, resulting in sexual behaviour that increases risk of HIV acquisition. We aimed to determine the prevalence of HD and SU and its association with sexual behaviour among Zimbabwean youth.

**What this study adds** – Among 17585 youth in three provinces in Zimbabwe, 4.5% reported HD and 7.0% reported SU. HD and SU were more common in males, particularly those who were informally employed or unemployed. Males and females reporting HD and/or SU also reported riskier sexual behaviour, particularly having >1 sexual partner and transactional sex.

**How this study might affect research, practice, or policy** – This study will help inform the development of contextually relevant targeted interventions to prevent or treat HD and SU as part of HIV prevention strategies. In addition, addressing sexual health should be an integral component of the management of HD and SU.

## INTRODUCTION

Hazardous drinking (HD) and substance use (SU) are of increasing public health concern (1). Globally, an estimated 2.8 million deaths were attributed to alcohol use whilst 425,000 deaths were estimated to have been caused by SU between 1990 and 2016 (2). Alcohol is the most used substance globally while SU, defined as the use of illicit drugs such as opioids, cannabis, amphetamines, and cocaine is on the increase in Sub-Saharan Africa (SSA) (2–8). In 2016 Southern Africa had the second highest age-standardised burden of disease attributable to alcohol, after Eastern Europe (2). Current SU by adolescents in many countries has been reported to be higher than lifetime use in previous generations, with SU among adolescents and young people being predicted to increase in the African continent by 40% by 2030 (9).

Adolescence and young adulthood is a period of experimentation and risk-taking, an essential facet of cognitive development and maturity (10,11). Such experimentation and risk-taking may include the hazardous use of alcohol and substances in various contexts (10,12). SU and HD impairs cognitive functioning in a variety of ways including causing impaired decision making, reduced risk perception and disinhibition (12–14). SU and HD may alter the individual's perception of pleasure experienced from having sex under the influence of intoxicating substances, as well as physically limit an individual's ability to think of and take protective measures resulting in increased risk of HIV and other sexually transmitted infections (1,10,14). The intersection between SU and HD and sexual behaviours is of particular concern in Southern Africa, which has the highest HIV prevalence of any global subregion (15). This study therefore aimed to determine the prevalence of HD and SU and its association with sexual behaviour among youth, a population at particularly high risk of HIV and STIs, in Zimbabwe (16,17).



## **METHODS**

### **Study design and study setting**

This study used data from a population-based survey conducted to ascertain the outcome of a cluster-randomised trial (CHIEDZA) [Trial Registration number: NCT03719521]. The trial protocol has been published elsewhere (16). Briefly the CHIEDZA trial was conducted in three provinces (Harare, Bulawayo, and Mashonaland East), each with 8 clusters (defined as geographically demarcated areas) randomised 4:4 to either standard of care (existing facility-based health services) or the intervention which was integrated community based HIV and sexual and reproductive health service provision (16). The trial outcomes were ascertained through a cross-sectional population-based survey, conducted in Harare (October– December 2021), Bulawayo (January– March 2022) and Mashonaland East (April– June 2022) aiming to recruit 16,800 youths, aged 18-24 years (700 per cluster).

### **Survey methods**

Multi-stage sampling was used: satellite images were utilised to map each building within a cluster onto Openstreetmap, and ARCGIS was utilized to divide all streets within the cluster into short sections (approximately 100m-200m). A random sample of street sections was selected, and all residents of those sections were enumerated. All eligible individuals (individuals aged 18-24 years residing in households on either side of the selected street sections) were approached for participation in the survey.

An interviewer-administered questionnaire collected socio-demographic data, participants' sexual behaviour, knowledge of and use of HIV prevention methods, mental health, and experience of violence. The Alcohol Use Disorders Identification Test (AUDIT) was used to screen for alcohol use disorder (18). This is a 10-item internationally validated tool developed

1  
2  
3 by the World Health Organization (WHO) and the most widely used alcohol screening  
4 instrument globally. The frequency of use and range of substances commonly used in the local  
5 setting was recorded. This included drugs that are smoked (e.g. weed, dagga, ganja), orally  
6 ingested (ganja cake or popcorn, prescription drugs such as cough syrup), sniffed or inhaled  
7 (e.g. glue, cocaine) or injected (excluding medical drugs like insulin). A dried blood spot (DBS)  
8 was collected for HIV antibody and viral load testing.  
9

10  
11 Survey data were collected onto encrypted and password-protected electronic tablets using  
12 SurveyCTO (Cambridge, USA) and uploaded to a secure SurveyCTO server at the end of each  
13 day. Data was downloaded and stored onto a password-controlled and secure Biomedical  
14 Research and Training Institute (BRTI) Microsoft SQL Server and managed using Microsoft  
15 Access as the front-end and with access limited to defined study personnel.  
16

### 17 ***Explanatory and outcome variables***

18 An AUDIT score of 8 and above was indicative of HD and possible alcohol dependence.  
19 Substance use was defined as ever use of one or more of the substances listed above. The  
20 outcome was sexual risk behaviour. Sexual risk behaviour was assessed using three self-  
21 reported indicators: (i) condom use during vaginal and anal sex in the past 12 months (ii)  
22 having more than one sexual partner in the past 12 months, and (iii) receiving or providing  
23 transactional sex as defined by receiving or providing money or help to pay for their expenses  
24 or favour in order to enter or remain in a sexual relationship in the past 12 months. Other  
25 explanatory variables included age, sex, level of education, employment status, wealth  
26 quintile, and marital status. Wealth quintile was assessed from a principal component  
27 analysis of household asset ownership.  
28  
29  
30  
31  
32  
33  
34  
35  
36  
37  
38  
39  
40  
41  
42  
43  
44  
45  
46  
47  
48  
49  
50  
51  
52  
53  
54  
55  
56  
57  
58  
59  
60

### Data analysis

Data analysis was performed using STATA version 17 (StatCorp, Texas, USA). The prevalence of SU, HD and concurrent SU and HD among males and females was calculated. To assess the effect of HD and SU on risky sexual behaviour, a forward-stepwise multivariable regression analysis using a multi-level mixed-effects generalized linear model was used. This model was selected due to the multistage sampling with stratification and unequal sampling probabilities for the clusters because they had different numbers of youth residents (19). The analyses were stratified by sex given the difference in prevalence of SU and HD. Data analysis was conducted using the "mehl" command in STATA, which allows for the incorporation of weights in the analysis and utilizes a pseudolikelihood approach to account for the inverse probability weights. This method is known for providing robust standard errors when sampling weights are present. Age group was considered an *a priori* confounder and the final models were adjusted for sociodemographic characteristics and trial arm as the intervention could have had an effect on sexual behaviours.

### Ethical considerations

Ethical approval was obtained from the Medical Research Council of Zimbabwe (reference number: MRCZ/A/2387), the Institutional Review Board of the Biomedical Research and Training Institute (reference number: AP149/2018), and the London School of Hygiene & Tropical Medicine (LSHTM) Research Ethics Committee (reference number: 12063). Participants viewed an information video about the study (in either English, Shona or Ndebele) on a tablet. Consent was documented electronically on a tablet, with participants retaining a signed paper copy for their records (16).

## RESULTS

A total of 17,683 participants were surveyed, with one participant excluded from data analysis due to being the only one with non-binary gender identification (and therefore not possible to categorize for analyses), 35 youths excluded due to missing data, and 62 with missing values on either SU or HD (see Fig 1). Overall, 17,585 participants were eligible for analysis (Fig 1). The median age of participants was 20 years (IQR: 19, 22) and 61% were female.

### Prevalence of HD and SU

Of the 17585 participants eligible for analysis, 15828 (90.3%) were non-substance users and non-hazardous drinkers. The overall prevalence of HD was 4.5% (95% CI: 4.1, 4.9) and of SU was 7.0% (95%CI: 6.5, 7.6), with the prevalence of concurrent HD and SU being 1.8% (95% CI: 1.5, 2.0). Males had a higher prevalence than females of HD (8.2% vs 1.9%) and of SU (15.1% vs 1.5%). Concurrent HD and SU was reported by 3.7% and 0.4% of males and females respectively. Weed or Ganja was the most prevalent substance used in both men (14.5%) and women (1.06%).

Among males, HD and SU was more common in older youth (21-24 years), ever married, in a higher wealth quantile and in those who were informally employed/unemployed compared to being in school or in formal employment. In contrast, in females, HD and SU were more prevalent among those who were never married compared to those that had ever been married, in those who had a post-secondary school education, and in those who were in school or formal employment compared to those who were unemployed/informally employed (Table 1).

1  
2  
3  
4  
5  
6  
7  
8  
9  
10  
11  
12  
13  
14  
15  
16  
17  
18  
19  
20  
21  
22  
23  
24  
25  
26  
27  
28  
29  
30  
31  
32  
33  
34  
35  
36  
37  
38  
39  
40  
41  
42  
43  
44  
45  
46

**Table 1: Substance and hazardous alcohol use of participants against sociodemographic and economic characteristics of participants, by sex**

| Variable                          | Males          |                                   |                                   |                                   |                                 | Females        |                                     |                                   |                                   |                                  |
|-----------------------------------|----------------|-----------------------------------|-----------------------------------|-----------------------------------|---------------------------------|----------------|-------------------------------------|-----------------------------------|-----------------------------------|----------------------------------|
|                                   | No SU or HD    |                                   | SU only                           | HD only                           | HD and SU                       | No SU or HD    |                                     | SU only                           | HD only                           | HD and SU                        |
|                                   | N <sup>§</sup> | n <sup>§</sup> (%) <sup>†</sup>   | n <sup>§</sup> (%) <sup>†</sup>   | n <sup>§</sup> (%) <sup>†</sup>   | n <sup>§</sup> (%) <sup>†</sup> | N <sup>§</sup> | n <sup>§</sup> (%) <sup>†</sup>     | n <sup>§</sup> (%) <sup>†</sup>   | n <sup>§</sup> (%) <sup>†</sup>   | n <sup>§</sup> (%) <sup>†</sup>  |
| Total                             | 6884           | 5485 (80.4)<br>[95%CI:79.1, 81.7] | 808 (11.4)<br>[95%CI: 10.4, 12.4] | 329 (4.49)<br>[95%CI: 3.93, 5.13] | 262 (3.71) [95%CI: 3.22, 4.28]  | 10701          | 10343 (97.0)<br>[95%CI: 96.6, 97.3] | 133 (1.12)<br>[95%CI: 0.91, 1.37] | 174 (1.49)<br>[95%CI: 1.26, 1.77] | 51 (0.41)<br>[95%CI: 0.30, 0.56] |
| Age category in years             |                |                                   |                                   |                                   |                                 |                |                                     |                                   |                                   |                                  |
| 18-20                             | 3825           | 3231(84.8)                        | 381(9.7)                          | 121(3.2)                          | 92(2.3)                         | 5374           | 5213(97.3)                          | 67(1.2)                           | 66(1.1)                           | 28(0.4)                          |
| 21-24                             | 3059           | 2254(74.8)                        | 427(13.5)                         | 208(6.2)                          | 170(5.5)                        | 5327           | 5130(96.7)                          | 66 (1.0)                          | 108(1.9)                          | 23(0.4)                          |
| Marital status                    |                |                                   |                                   |                                   |                                 |                |                                     |                                   |                                   |                                  |
| Never married                     | 6528           | 5242(81.0)                        | 759(11.3)                         | 292(4.2)                          | 235(3.5)                        | 6712           | 6448(96.5)                          | 101(1.3)                          | 124(1.7)                          | 39(0.5)                          |
| Ever married                      | 356            | 243(71.4)                         | 49(11.5)                          | 37(9.8)                           | 27(7.3)                         | 3989           | 3895(97.7)                          | 32(0.8)                           | 50(1.2)                           | 12(0.3)                          |
| Education level                   |                |                                   |                                   |                                   |                                 |                |                                     |                                   |                                   |                                  |
| Up to Primary school              | 248            | 190(76.0)                         | 32(12.6)                          | 12(4.8)                           | 14(6.6)                         | 618            | 607(98.3)                           | 3(0.4)                            | 3(0.5)                            | 5(0.8)                           |
| Secondary school                  | 6002           | 4790(80.8)                        | 713(11.4)                         | 274(4.2)                          | 225(3.6)                        | 9317           | 9012(97.0)                          | 118(1.1)                          | 146(1.4)                          | 41(0.4)                          |
| Post-secondary schooling          | 634            | 505(78.6)                         | 63(9.9)                           | 43(7.2)                           | 23(4.3)                         | 766            | 724(95.0)                           | 12(1.4)                           | 25(3.1)                           | 5(0.5)                           |
| Wealth quintile                   |                |                                   |                                   |                                   |                                 |                |                                     |                                   |                                   |                                  |
| Poorest                           | 1148           | 964(85.4)                         | 124(9.9)                          | 29(2.5)                           | 31(2.2)                         | 2499           | 2438(97.9)                          | 21(0.8)                           | 30(1.0)                           | 10(0.3)                          |
| Poorer                            | 1192           | 950(81.6)                         | 141(10.4)                         | 58(4.5)                           | 43(3.6)                         | 2214           | 2150(97.3)                          | 20(0.9)                           | 37(1.6)                           | 7(0.3)                           |
| Middle                            | 1443           | 1132(79.1)                        | 177(11.9)                         | 68(4.5)                           | 66(4.5)                         | 2125           | 2065(97.4)                          | 22(0.9)                           | 30(1.4)                           | 8(0.3)                           |
| Richer                            | 1462           | 1140(77.9)                        | 184(12.8)                         | 83(5.5)                           | 55(3.8)                         | 1987           | 1914(96.5)                          | 27(1.3)                           | 36(1.7)                           | 10(0.5)                          |
| Richest                           | 1635           | 1297(78.4)                        | 182(11.8)                         | 89(5.3)                           | 67(4.4)                         | 1860           | 1763(95.2)                          | 42(2.1)                           | 40(2.0)                           | 15(0.7)                          |
| Employment                        |                |                                   |                                   |                                   |                                 |                |                                     |                                   |                                   |                                  |
| In school or formal employment    | 2824           | 2386(84.5)                        | 247(8.8)                          | 117(4.0)                          | 74(2.7)                         | 2934           | 2815(96.5)                          | 49(1.5)                           | 56(1.7)                           | 14(0.3)                          |
| Informal employment or unemployed | 4060           | 3099(77.8)                        | 561(13.0)                         | 212(4.8)                          | 188(4.4)                        | 7767           | 7528(97.2)                          | 84 (1.0)                          | 118 (1.4)                         | 37 (0.4)                         |

<sup>†</sup>weighted percent, <sup>§</sup>unweighted count

### Prevalence of risky sexual behaviour in people reporting HD and/or SU

Sexual behaviour of male and female hazardous drinkers and substance users are shown in Table 2. Among males, a higher proportion of those who engaged in HD (50.9%), SU (43.8%) and concurrent HD and SU (61.1%) had had more than one sexual partner in the past 12 months compared to those who did not engage in HD or SU (21.4%). Similarly, a higher proportion of males who engaged in HD (6.6%), SU (5.2%) or concurrent SU and HD (13.5%) had received or given transactional sex compared to those who had neither reported HD or SU (1.9%) (Table 2). A similar trend was seen among female participants despite the small numbers of females who reported HD, SU and HD and SU.

Table 2: Sexual risk behaviours and HIV prevention uptake of participants against levels of substance and hazardous alcohol use by sex

| Variable                             | Male           |                                                |                                            |                                            |                                              | Female         |                                                |                                            |                                            |                                              |
|--------------------------------------|----------------|------------------------------------------------|--------------------------------------------|--------------------------------------------|----------------------------------------------|----------------|------------------------------------------------|--------------------------------------------|--------------------------------------------|----------------------------------------------|
|                                      | N <sup>§</sup> | No SU or HD<br>n <sup>§</sup> (%) <sup>†</sup> | SU only<br>n <sup>§</sup> (%) <sup>†</sup> | HD only<br>n <sup>§</sup> (%) <sup>†</sup> | HD and SU<br>n <sup>§</sup> (%) <sup>†</sup> | N <sup>§</sup> | No SU or HD<br>n <sup>§</sup> (%) <sup>†</sup> | SU only<br>n <sup>§</sup> (%) <sup>†</sup> | HD only<br>n <sup>§</sup> (%) <sup>†</sup> | HD and SU<br>n <sup>§</sup> (%) <sup>†</sup> |
| >1 sexual partners in past 12 months |                |                                                |                                            |                                            |                                              |                |                                                |                                            |                                            |                                              |
| Yes                                  | 1861           | 1182(21.4)                                     | 357(43.8)                                  | 168(50.9)                                  | 154(61.1)                                    | 734            | 625(5.9)                                       | 40(33.8)                                   | 49(28.6)                                   | 20(42.4)                                     |
| No                                   | 4900           | 4225(78.6)                                     | 425(56.2)                                  | 151(49.1)                                  | 99(38.9)                                     | 9884           | 9645(94.1)                                     | 91(66.2)                                   | 120(71.4)                                  | 28(57.6)                                     |
| Transactional sex                    |                |                                                |                                            |                                            |                                              |                |                                                |                                            |                                            |                                              |
| Yes                                  | 202            | 104(1.9)                                       | 40(5.2)                                    | 23(6.6)                                    | 35(13.5)                                     | 179            | 144(1.4)                                       | 10(6.5)                                    | 17(9.9)                                    | 8(19.3)                                      |
| No                                   | 6682           | 5381(98.1)                                     | 768(94.8)                                  | 306(93.4)                                  | 227(86.5)                                    | 10522          | 6121(98.6)                                     | 123(93.5)                                  | 157(90.1)                                  | 43(80.7)                                     |
| Inconsistent condom use <sup>‡</sup> |                |                                                |                                            |                                            |                                              |                |                                                |                                            |                                            |                                              |
| No                                   | 2235           | 1613(59.8)                                     | 328(57.7)                                  | 170(60.0)                                  | 124(54.4)                                    | 1578           | 1469(23.2)                                     | 32(28.9)                                   | 60(42.5)                                   | 17(42.8)                                     |
| Yes                                  | 1494           | 1042(40.2)                                     | 247(42.3)                                  | 100(40.0)                                  | 105(45.6)                                    | 4961           | 4777(76.8)                                     | 68(71.1)                                   | 90(57.5)                                   | 26(57.2)                                     |
| Ever taken PrEP                      |                |                                                |                                            |                                            |                                              |                |                                                |                                            |                                            |                                              |
| Yes                                  | 50             | 28(0.4)                                        | 9(1.0)                                     | 6(1.7)                                     | 7(2.6)                                       | 96             | 81(0.8)                                        | 3(1.9)                                     | 9(5.2)                                     | 3(7.8)                                       |
| No                                   | 6834           | 5457(99.6)                                     | 799(99.0)                                  | 323(98.3)                                  | 255(97.4)                                    | 10605          | 10262(99.2)                                    | 130(98.1)                                  | 165(94.8)                                  | 48(92.2)                                     |
| Ever taken HIV test                  |                |                                                |                                            |                                            |                                              |                |                                                |                                            |                                            |                                              |
| Yes                                  | 4157           | 3127(56.1)                                     | 563(69.5)                                  | 261(78.6)                                  | 206(78.0)                                    | 7935           | 7638(73.6)                                     | 108(78.3)                                  | 148(85.1)                                  | 41(82.7)                                     |
| No                                   | 2703           | 2335(43.9)                                     | 244(30.5)                                  | 68(21.4)                                   | 56(22.0)                                     | 2761           | 2700(26.4)                                     | 25(21.7)                                   | 26(14.9)                                   | 10(17.3)                                     |

<sup>†</sup>weighted percent, <sup>§</sup>unweighted count, <sup>‡</sup>Only for participants who had ever had sexual intercourse

1  
2  
3  
4  
5  
6 While a lower proportion of sexually active males who engaged in HD and SU used condoms  
7  
8 consistently, the opposite was observed among females, with a higher proportion of female  
9  
10 hazardous drinkers or substance users reporting consistent condom use. Females who  
11  
12 engaged in HD (42.5%), SU (28.9%) and both HD and SU (42.8%) reported consistent condom  
13  
14 use compared to non-hazardous drinkers and substance users (23.2%).  
15  
16  
17  
18  
19

### 20 **Association of hazardous drinking and substance use with sexual behaviour.**

21  
22 Both males and females who engaged in HD and SU had significantly higher odds of having  
23  
24 had more than one sexual partner in the past 12 months and engaging in transactional sex  
25  
26 (Tables 3a and b). In males, after adjusting for socio-demographic factors, there was increased  
27  
28 odds of having >1 sexual partner amongst hazardous drinkers (aOR=3.39, 95%CI=2.70-4.26),  
29  
30 substance users (aOR=2.67, 95%CI=2.21-3.23) and amongst those that did both (aOR=4.57,  
31  
32 95%CI=3.59-5.81) compared to non-hazardous drinkers and substance users. In addition,  
33  
34 when comparing to males who did not engage in HD or SU, there was an increased odds of  
35  
36 receiving/providing transactional sex among hazardous drinkers (aOR=3.62, 95%CI=2.26-  
37  
38 5.79), substance users (aOR=2.49, 95%CI=1.67-3.73) and concurrent hazardous drinkers and  
39  
40 substance users (aOR=7.72, 95%CI=5.42-11.01).  
41  
42  
43  
44  
45  
46  
47  
48  
49  
50  
51  
52  
53  
54  
55  
56  
57  
58  
59  
60



Table 3a: Association of substance use and hazardous alcohol drinking with sexual risk behaviours in male participants

| Variable                                            | Sexual risk behaviours                                                      |         |                                                |         |                                                      |         |
|-----------------------------------------------------|-----------------------------------------------------------------------------|---------|------------------------------------------------|---------|------------------------------------------------------|---------|
|                                                     | More than one sexual partners in past 12 month (Yes) (N <sup>§</sup> =6761) |         | Transactional sex (Yes) (N <sup>§</sup> =6880) |         | Inconsistent condom use (Yes) (N <sup>§</sup> =3729) |         |
|                                                     | aOR <sup>†</sup> (95 CI%)                                                   | p-value | aOR <sup>‡</sup> (95 CI%)                      | p-value | aOR <sup>††</sup> (95 CI%)                           | p-value |
| Non substance use and non hazardous alcohol drinker | Reference                                                                   |         | Reference                                      |         | Reference                                            |         |
| Substance user only                                 | 2.67(2.21, 3.22)                                                            | <0.001  | 2.51(1.68, 3.74)                               | <0.001  | 1.22(1.03, 1.47)                                     | 0.024   |
| Hazardous alcohol drinker only                      | 3.40(2.71, 4.28)                                                            | <0.001  | 3.60(2.24, 5.79)                               | <0.001  | 0.84(0.57, 1.24)                                     | 0.376   |
| Both hazardous alcohol drinker and substance user   | 4.57(3.59, 5.81)                                                            | <0.001  | 7.74(5.44, 11.0)                               | <0.001  | 1.31(0.95, 1.82)                                     | 0.100   |

<sup>†</sup>Odds ratio adjusted for age group, marital status, education level, employment status, trial arm and province; <sup>‡</sup>odds ratio adjusted for age group, employment status, wealth quintile, trial arm and province; <sup>††</sup>odds ratio adjusted for age group, marital status, trial arm and employment status, <sup>§</sup>unweighted count,

Table 3b: Association of substance use and hazardous alcohol drinking with sexual risk behaviours in female participants

| Variable                                            | Sexual risk behaviours                                                       |         |                                                 |         |                                                      |         |
|-----------------------------------------------------|------------------------------------------------------------------------------|---------|-------------------------------------------------|---------|------------------------------------------------------|---------|
|                                                     | More than one sexual partners in past 12 month (Yes) (N <sup>§</sup> =10618) |         | Transactional sex (Yes) (N <sup>§</sup> =10701) |         | Inconsistent condom use (Yes) (N <sup>§</sup> =6529) |         |
|                                                     | aOR <sup>†</sup> (95 CI%)                                                    | p-value | aOR <sup>‡</sup> (95 CI%)                       | p-value | aOR <sup>††</sup> (95 CI%)                           | p-value |
| Non substance use and non hazardous alcohol drinker | Reference                                                                    |         | Reference                                       |         | Reference                                            |         |
| Substance user only                                 | 6.92(4.39, 10.9)                                                             | <0.001  | 6.62(3.42, 12.8)                                | <0.001  | 1.16(0.67, 2.03)                                     | 0.589   |
| Hazardous alcohol drinker only                      | 5.61(3.54, 8.87)                                                             | <0.001  | 7.87(4.48, 13.8)                                | <0.001  | 0.72(0.53, 0.98)                                     | 0.038   |
| Both hazardous alcohol drinker and substance user   | 9.67(4.37, 21.4)                                                             | <0.001  | 14.3(6.99, 29.1)                                | <0.001  | 0.90(0.45, 1.79)                                     | 0.766   |

<sup>†</sup>Odds ratio adjusted for age group, marital status, employment status, education level, trial arm and province, <sup>‡</sup>odds ratio adjusted for age group, education level, employment status, trial arm and marital status; <sup>††</sup>odds ratio adjusted for age group, marital status, trial arm, education level, employment status, wealth quintile and province; <sup>§</sup>unweighted count

1  
2  
3  
4  
5  
6  
7  
8  
9  
10  
11  
12  
13  
14  
15  
16  
17  
18  
19  
20  
21  
22  
23  
24  
25  
26  
27  
28  
29  
30  
31  
32  
33  
34  
35  
36  
37  
38  
39  
40  
41  
42  
43  
44  
45  
46  
47  
48  
49  
50  
51  
52  
53  
54  
55  
56  
57  
58  
59  
60

In males but not females, substance use was associated with a 22% increased odds of inconsistent condom use (aOR=1.22, 95% CI 1.03-1.47). However, in females, HD only was associated with a 28% decreased odds of inconsistent condom use (aOR=0.73, 95% CI=0.54-0.98).

## DISCUSSION

In this population-based survey of Zimbabwean youth, the prevalence of HD, SU and concurrent HD and SU was high, particularly in males who were older, in a higher wealth quantile and informally or unemployed. HD and SU were associated with having more than one sexual partner and having received or provided transactional sex in the past 12 months in both males and females. SU was associated with inconsistent condom use in males whereas HD in females was associated with consistent condom use.

A systematic review of population based studies conducted between 2000-2016 in sub-Saharan Africa reported a prevalence of lifetime use of any substance of 37% among adolescents in Southern Africa (4). The considerable difference in SU prevalence between this and that reported in our study could be attributed to the inclusion of caffeine and alcohol use as a psychoactive substance in the systematic review. The Zimbabwe Mental Health Investment Case reported the population prevalence of substance abuse in the country to be 2%, a prevalence that is lower than that reported in this study, with the prevalence being higher in young adults than other population groups (20). Cannabis was the most commonly used substance in this study, results that are similar to other studies that have shown cannabis to be the most frequently used substance in Zimbabwe and in the Southern African

1  
2  
3 region (20–22). When considering hazardous drinking, results from a study conducted in  
4  
5 Eastern Africa in 2014, showed a median prevalence of hazardous drinking of 3% among  
6  
7 young people 15-24 years of age(23). In Zimbabwe in 2016, the population prevalence of  
8  
9 alcohol use disorders in those 15 years and older was reported to be 6.4% (20).  
10  
11  
12  
13  
14

15 Consistent with our study findings, alcohol and substance use has been reported to be more  
16  
17 prevalent in males than females, with studies showing that current and ever use of substances  
18  
19 can be more than three times higher in males than in females (24–28). Increased HD and SU  
20  
21 in males has been attributed to males having increased access and opportunity to use alcohol  
22  
23 and illicit substance use, cultural roles and expectations surrounding masculinity and alcohol  
24  
25 or SU and the tendency for men to take part in risky health behaviours such as HD and SU  
26  
27 (25,27–29). It is important to note that the prevalence reported particularly among women,  
28  
29 may be an underestimate due to the stigma attached to alcohol and SU in this setting, which  
30  
31  
32  
33  
34  
35  
36  
37  
38  
39  
40  
41  
42  
43  
44  
45  
46  
47  
48  
49  
50  
51  
52  
53  
54  
55  
56  
57  
58  
59  
60

We found a higher prevalence of HD and SU in males that were in a higher wealth quantile  
and those who were either informally employed or unemployed compared to being in school  
or having formal employment. Men have a breadwinning role and the higher prevalence of  
HD and SU among young men may be a consequence of the lack of opportunities, financial  
instability and perceived hopelessness in a fragile economic environment with very high rates  
of unemployment particularly among young people (31–34). In addition, increased supply and  
access of substances caused by porous borders and potentially the COVID-19 pandemic that  
resulted in youths being anxious, depressed or unoccupied because of being away from

1  
2  
3 school or work due to the lockdowns or loss of employment, may have contributed to HD and  
4  
5 SU in Zimbabwean youths (31,33).  
6  
7  
8  
9

10 Interestingly, HD and SU although generally much less prevalent in women, were found to be  
11  
12 more common in those who were in school or in formal employment. This may reflect  
13  
14 women's ability to access these substances due to their ever-changing economic role of in  
15  
16 society (26).  
17  
18  
19  
20  
21

22 HD and SU were associated with risky sexual behaviour, namely having multiple sexual  
23  
24 partners and transactional sex. This finding is similar to that of other studies that found that  
25  
26 heavy drinking and the use of cannabis and other illicit drugs is associated with an increased  
27  
28 likelihood of having multiple sexual partners and having transactional sex in African youth  
29  
30 (35–39). This may reflect a group that is generally more “risk-taking” and therefore more likely  
31  
32 to engage in both substance use and risky sexual behaviour at this age. HD and SU may also  
33  
34 influence sexual risk behaviour most likely through their disinhibiting effect, resulting in the  
35  
36 inability to reason and make decisions (40,41).  
37  
38  
39  
40  
41  
42  
43  
44

45 Experimental alcohol and SU as well as sexual behaviour tends to begin during adolescence  
46  
47 and continues into young adulthood as young people gain autonomy and it is therefore a  
48  
49 timely period to intervene to modify behaviours (12,25). Education programmes, highlighting  
50  
51 the dangers of HD and SU, need to start as early as possible, targeting both children and  
52  
53 adolescents with age-appropriate messaging. This could be integrated with comprehensive  
54  
55 sexuality education with a focus on young men, who are a particularly important target group  
56  
57 given that they are generally more likely to engage in higher risk behaviours.  
58  
59  
60

1  
2  
3 There is also a real scarcity of HD and SU treatment programmes, and our study adds to the  
4 growing body of literature highlighting the growing problem of HD and SU in Africa,  
5 particularly among young people. Effective and context-appropriate interventions to address  
6 SU and HD are urgently needed. Interventions need to be gender-sensitive and free from risk  
7 of victimisation and related stigma (24). Context-specific research on the range of substances  
8 used, the patterns and drivers of alcohol and substance use and the context and culture of SU  
9 and HD among youth can inform interventions for both prevention and treatment of  
10 addiction.  
11  
12  
13  
14  
15  
16  
17  
18  
19  
20  
21  
22  
23  
24

25 Our study highlights the relationship between HD and SU and sexual behaviours and draws  
26 attention to both the need and opportunity for the integration of HD and SU screening in  
27 sexual reproductive health care services and as part of HIV prevention programmes. For  
28 example, when providing sexual health counselling, offering condoms, pre-exposure  
29 prophylaxis or HIV or STI testing, there is an opportunity to screen for and address SU (42,43).  
30 Similarly, it is important to address the sexual health of individuals being treated for HD or  
31 SU.  
32  
33  
34  
35  
36  
37  
38  
39  
40  
41  
42  
43  
44

45 Our study has a number of strengths, namely the large sample size, and that the estimates  
46 derived from a population-based survey. Participants were randomly selected, and  
47 participation rates were high, minimising selection bias. We acknowledge several limitations:  
48 due to its cross-sectional nature, we are unable to establish causality, or the temporality of  
49 associations observed. Use of self-reported measures may result in underreporting of alcohol  
50 and substance use, as well as risky sexual behaviours. The study was conducted in urban and  
51 peri-urban settings and is therefore not representative of rural settings. In addition, we did  
52  
53  
54  
55  
56  
57  
58  
59  
60

1  
2  
3 not ascertain the frequency or patterns of substance use; in analyses, use of different  
4  
5 substances (which may have different effects) were considered a single category.  
6  
7  
8  
9

## 10 **CONCLUSION**

11  
12 In conclusion, this study demonstrates an association between HD, SU and risky sexual  
13  
14 behaviour. There is an urgent need for evidence-based, age, gender and context-appropriate  
15  
16 preventive and treatment interventions targeting HD, SU and sexual behaviour. Importantly  
17  
18 addressing SU and HD should be a core aspect of the HIV prevention toolkit and sexual health  
19  
20 should be integrated within management of SU and HD.  
21  
22  
23  
24  
25  
26  
27  
28  
29  
30  
31  
32  
33  
34  
35  
36  
37  
38  
39  
40  
41  
42  
43  
44  
45  
46  
47  
48  
49  
50  
51  
52  
53  
54  
55  
56  
57  
58  
59  
60

**Availability of data and materials**

The datasets used and/or analysed during the current study are available from the corresponding author on request.

**Authors' contributions**

Kudzai Hlahla conceptualised and is the lead investigator and author of this publication. Steven Azizi and Victoria Simms analysed the data. Rashida Ferrand is the Principal Investigator of the CHIEDZA Trial. Tsitsi Bandason was responsible for data management. Rashida Ferrand, Chido Dziva Chikwari, Ethel Dauya, Mandikudza Tembo and Katharina Kranzer contributed to the coordination of the study and critical revisions of the manuscript. All authors read and approved the final manuscript.

**Competing interests**

No competing interests.

**Acknowledgements**

The abstract from this paper was presented at INTEREST 2023 in Maputo Mozambique as poster number 113.

The authors would also like to thank all the participants in the study.

**Funding**

The CHIEDZA study was funded by the Wellcome Trust through a Senior Fellowship to RAF (206316/Z/17/Z)

**REFERENCES**

1. Ssekamatte T, Nalugya A, Mugambe RK, Wagaba B, Nakalembe D, Mutebi A, et al. Prevalence and predictors of sex under the influence of psychoactive substances among young people in informal settlements in Kampala, Uganda. *BMC Public Health*. 2023;23(1):801.
2. Degenhardt L, Charlson F, Ferrari A, Santomauro D, Erskine H, Mantilla-Herrara A, et al. The global burden of disease attributable to alcohol and drug use in 195 countries and territories, 1990–2016: a systematic analysis for the Global Burden of Disease Study 2016. *The Lancet Psychiatry*. 2018;5(12):987–1012.
3. Boua PR, Soo CC, Debpuur C, Maposa I, Nkoana S, Mohamed SF, et al. Prevalence and socio-demographic correlates of tobacco and alcohol use in four sub-Saharan African countries: a cross-sectional study of middle-aged adults. *BMC Public Health*. 2021;21(1):1–14.
4. Olawole-Isaac A, Ogundipe O, Amoo EO, Adeloye D. Substance use among adolescents in sub-Saharan Africa: A systematic review and meta-analysis. *SAJCH South African J Child Heal*. 2018;12(Special Issue):S79–84.
5. World Health Organization. Alcohol | WHO | Regional Office for Africa [Internet]. 2010 [cited 2023 Mar 23]. Available from: <https://www.afro.who.int/health-topics/alcohol>
6. WHO Africa. Substance Abuse | WHO | Regional Office for Africa [Internet]. World Health Organization. 2021 [cited 2023 Mar 23]. Available from: <https://www.afro.who.int/health-topics/substance-abuse>



- 1  
2  
3 7. Morojele NK, Ramsoomar L, Dumbili EW, Kapiga S. Adolescent Health Series –  
4 Alcohol, tobacco, and other drug use among adolescents in sub-Saharan Africa: A  
5 narrative review. *Trop Med Int Heal*. 2021;26(12):1528–38.  
6  
7
- 8  
9  
10 8. Jumbe S, Mwenda-Kamninga T, Mwalwimba I, Kalu U-G. Determinants and Effects of  
11 Adolescent Substance Use in Africa: A Systematic Review Protocol. 2020;1–6.  
12  
13
- 14  
15 9. UNODC World Drug Report 2. Global Overview: Drug Demand Drug Supply. Global  
16 Overview : Drug Demand. World Drug Report 2. Global Overview: Drug Demand Drug  
17 Supply. 2022. 107 p.  
18  
19
- 20  
21 10. Schantz K. Substance Use and Sexual Risk Taking in Adolescence Risk taking in  
22 adolescence Adolescence: A time for taking chances. 2012;(July):1–9. Available from:  
23 [http://www.actforyouth.net/resources/rf/rf\\_substance\\_0712.pdf](http://www.actforyouth.net/resources/rf/rf_substance_0712.pdf)  
24  
25
- 26  
27 11. Gómez-Núñez MI, Molla-Esparza C, Gandia Carbonell N, Badenes Ribera L. Prevalence  
28 of Intoxicating Substance Use Before or During Sex Among Young Adults: A  
29 Systematic Review and Meta-Analysis. *Arch Sex Behav* [Internet]. 2023;(0123456789).  
30 Available from: <https://doi.org/10.1007/s10508-023-02572-z>  
31  
32
- 33  
34 12. Viner RM, Allen NB, Patton GC. Puberty, Developmental Processes, and Health  
35 Interventions. *Dis Control Priorities, Third Ed (Volume 8) Child Adolesc Heal Dev*  
36 [Internet]. 2017 Nov 20 [cited 2022 Oct 20];107–18. Available from:  
37 <https://pubmed.ncbi.nlm.nih.gov/30212144/>  
38  
39
- 40  
41 13. Steele CM, Josephs RA. Alcohol Myopia: Its Prized and Dangerous Effects. *Am Psychol*.  
42 1990;45(8):921–33.  
43  
44
- 45  
46 14. Brook DW, Brook JS, Pahl T, Montoya I. The longitudinal relationship between drug  
47 use and risky sexual behaviors among Colombian adolescents. *Arch Pediatr Adolesc*  
48 *Med*. 2002;156(11):1101–7.  
49  
50  
51  
52  
53  
54  
55  
56  
57  
58  
59  
60

- 1  
2  
3 15. HIV/AIDS JUNP on. In Danger: UNAIDS Global AIDS Update 2022. Danger UNAIDS Glob  
4  
5 AIDS Updat 2022 [Internet]. 2022; Available from:  
6  
7 <https://www.unaids.org/en/resources/documents/2022/in-danger-global-aids->  
8  
9 update  
10  
11
- 12  
13 16. Dziva Chikwari C, Dauya E, Bandason T, Tembo M, Mavodza C, Simms V, et al. The  
14  
15 impact of community-based integrated HIV and sexual and reproductive health  
16  
17 services for youth on population-level HIV viral load and sexually transmitted  
18  
19 infections in Zimbabwe: protocol for the CHIEDZA cluster-randomised trial. Wellcome  
20  
21 Open Res. 2022;7:54.  
22
- 23  
24 17. Reliefweb. ZIMBABWE: Worrying rise in STIs among young people - Zimbabwe |  
25  
26 ReliefWeb [Internet]. [cited 2023 Sep 25]. Available from:  
27  
28 <https://reliefweb.int/report/zimbabwe/zimbabwe-worrying-rise-stis-among-young->  
29  
30 people  
31  
32
- 33  
34 18. World Health Organization (WHO). AUDIT: The Alcohol Use Disorders Identification  
35  
36 Test Guidelines for Use in Primary [Internet]. Vol. S e c o nd. 2001. 1–41 p. Available  
37  
38 from: <https://www.who.int/publications/i/item/WHO-MSD-MSB-01.6a>  
39  
40
- 41  
42 19. Rabe-Hesketh S, Skrondal A. Multilevel modelling of complex survey data. J R Stat Soc  
43  
44 Ser A Stat Soc. 2006;169(4):805–27.  
45  
46
- 47  
48 20. Johnson RW. Prevention and management of mental health conditions in Zimbabwe:  
49  
50 The case for intervention. Curr Hist. 2022;106(700):233–4.  
51
- 52  
53 21. Rwafa C, Mangezi WO, Madhombiro M. Substance Use Among Patients Admitted to  
54  
55 Psychiatric Units in Harare, Zimbabwe. SSRN Electron J. 2020;  
56
- 57  
58 22. Belete H, Mekonen T, Espinosa DC, Ambaw F, Connor J, Chan G, et al. Cannabis use in  
59  
60 sub-Saharan Africa: A systematic review and meta-analysis. Addiction.

- 1  
2  
3 2023;118(7):1201–15.  
4  
5  
6 23. Francis JM, Grosskurth H, Changalucha J, Kapiga SH, Weiss HA. Systematic review and  
7  
8 meta-analysis: Prevalence of alcohol use among young people in eastern Africa. *Trop*  
9  
10 *Med Int Heal*. 2014;19(4):476–88.  
11  
12  
13 24. UNODC. World Drug Report Executive Summary Policy Framework. Vienna, UNITED  
14  
15 NATIONS Off DRUGS CRIME. 2022;16–74.  
16  
17  
18 25. Degenhardt L, Stockings E, Patton G, Hall WD, Lynskey M. The increasing global health  
19  
20 priority of substance use in young people. *The Lancet Psychiatry* [Internet].  
21  
22 2016;3(3):251–64. Available from: [http://dx.doi.org/10.1016/S2215-0366\(15\)00508-8](http://dx.doi.org/10.1016/S2215-0366(15)00508-8)  
23  
24  
25 26. Ferreira-Borges C, Parry CDH, Babor TF. Harmful use of alcohol: A shadow over sub-  
26  
27 Saharan Africa in need of workable solutions. *Int J Environ Res Public Health*.  
28  
29 2017;14(4).  
30  
31  
32 27. Fentaw KD, Fenta SM, Biresaw HB. Prevalence and Associated Factors of Substance  
33  
34 Use Male Population in East African Countries: A Multilevel Analysis of Recent  
35  
36 Demographic and Health Surveys From 2015 to 2019. *Subst Abus Res Treat*. 2022;16.  
37  
38  
39 28. Pengpid S, Peltzer K, Ramlagan S. Prevalence and correlates of hazardous, harmful or  
40  
41 dependent alcohol use and drug use amongs persons 15 years and older in South  
42  
43 Africa: Results of a national survey in 2017. *African J Prim Heal Care Fam Med*.  
44  
45 2021;13(1):1–8.  
46  
47  
48 29. Equality EI for G. Health and risk behaviours are clearly gendered | European Institute  
49  
50 for Gender Equality [Internet]. [cited 2023 Aug 2]. Available from:  
51  
52 [https://eige.europa.eu/publications-resources/toolkits-guides/gender-equality-index-](https://eige.europa.eu/publications-resources/toolkits-guides/gender-equality-index-2021-report/health-and-risk-behaviours-are-clearly-gendered)  
53  
54 [2021-report/health-and-risk-behaviours-are-clearly-gendered](https://eige.europa.eu/publications-resources/toolkits-guides/gender-equality-index-2021-report/health-and-risk-behaviours-are-clearly-gendered)  
55  
56  
57  
58  
59 30. UNODC. Global Overview : Drug Demand. World Drug Report 2. Global Overview:  
60

- 1  
2  
3 Drug Demand Drug Supply. 2022. 107 p.  
4  
5  
6 31. Mukwenha S, Murewanhema G, Madziva R, Dzinamarira T, Herrera H, Musuka G.  
7  
8 Increased illicit substance use among Zimbabwean adolescents and youths during the  
9  
10 COVID-19 era: an impending public health disaster. *Addiction*. 2022;117(4):1177–8.  
11  
12  
13 32. Blessing NM, Mhizha S, Wilson A, Nhunzvi C. Understanding the nature of substance  
14  
15 use in Zimbabwe: State of the art and ways forward: A scoping review protocol.  
16  
17 medRxiv [Internet]. 2022;2022.07.18.22277771. Available from:  
18  
19 [https://www.medrxiv.org/content/10.1101/2022.07.18.22277771v1%0Ahttps://www](https://www.medrxiv.org/content/10.1101/2022.07.18.22277771v1%0Ahttps://www.medrxiv.org/content/10.1101/2022.07.18.22277771v1.abstract)  
20  
21 [w.medrxiv.org/content/10.1101/2022.07.18.22277771v1.abstract](https://www.medrxiv.org/content/10.1101/2022.07.18.22277771v1.abstract)  
22  
23  
24  
25 33. Muswerakuenda FF, Mundagowa PT, Madziwa C, Mukora-Mutseyekwa F. Access to  
26  
27 psychosocial support for church-going young people recovering from drug and  
28  
29 substance abuse in Zimbabwe: a qualitative study. *BMC Public Health*.  
30  
31 2023;23(1):723.  
32  
33  
34  
35 34. Redonnet B, Chollet A, Fombonne E, Bowes L, Melchior M. Tobacco, alcohol, cannabis  
36  
37 and other illegal drug use among young adults: The socioeconomic context. *Drug*  
38  
39 *Alcohol Depend*. 2012;121(3):231–9.  
40  
41  
42 35. Kalichman SC, Simbayi LC, Kaufman M, Cain D, Jooste S. Alcohol use and sexual risks  
43  
44 for HIV/AIDS in sub-saharan Africa: Systematic review of empirical findings. *Prev Sci*.  
45  
46 2007;8(2):141–51.  
47  
48  
49 36. Hedden SL, Hulbert A, Cavanaugh CE, Parry CD, Moleko AG, Latimer WW. Alcohol,  
50  
51 drug, and sexual risk behavior correlates of recent transactional sex among female  
52  
53 black South African drug users. *J Subst Use*. 2011;16(1):57–67.  
54  
55  
56 37. Doku D. Substance use and risky sexual behaviours among sexually experienced  
57  
58 Ghanaian youth. *BMC Public Health*. 2012;12(1).  
59  
60

- 1  
2  
3 38. Magni S, Christofides N, Johnson S, Weiner R. Alcohol Use and Transactional Sex  
4  
5 among Women in South Africa: Results from a Nationally Representative Survey. PLoS  
6  
7 One. 2015;10(12):1–15.  
8  
9  
10 39. Oppong Asante K, Meyer-Weitz A, Petersen I. Substance use and risky sexual  
11  
12 behaviours among street connected children and youth in Accra, Ghana. Subst Abuse  
13  
14 Treat Prev Policy. 2014;9:45.  
15  
16  
17 40. Ritchwood TD, Ford H, DeCoster J, Lochman JE, Sutton M. Risky sexual behavior and  
18  
19 substance use among adolescents: A meta-analysis. Child Youth Serv Rev [Internet].  
20  
21 2015;52:74–88. Available from: <http://dx.doi.org/10.1016/j.chilyouth.2015.03.005>  
22  
23  
24  
25 41. Scott-Sheldon LAJ, Carey KB, Cunningham K, Johnson BT, Carey MP. Alcohol Use  
26  
27 Predicts Sexual Decision-Making: A Systematic Review and Meta-Analysis of the  
28  
29 Experimental Literature. AIDS Behav [Internet]. 2016 Jan 1 [cited 2023 May 17];20(0  
30  
31 1):19. Available from: </pmc/articles/PMC4683116/>  
32  
33  
34  
35 42. Oldfield BJ, Edelman EJ. Addressing Unhealthy Alcohol Use and the HIV Pre-exposure  
36  
37 Prophylaxis Care Continuum in Primary Care: A Scoping Review. AIDS Behav  
38  
39 [Internet]. 2021;25(6):1777–89. Available from: [https://doi.org/10.1007/s10461-020-](https://doi.org/10.1007/s10461-020-03107-6)  
40  
41 03107-6  
42  
43  
44  
45 43. WHO,. WHO Implementation tool for pre-exposure prophylaxis (PrEP) of HIV  
46  
47 infection. Module 1: Clinical. Geneva: World Health Organization; 2017  
48  
49 (WHO/HIV/2017.17). Licence: CC BY-NC-SA 3.0 IGO. Defin HIV [Internet]. 2019;(July).  
50  
51 Available from: <https://www.who.int/hiv/pub/prep/prep-supplement-jias-2015/en/>  
52  
53  
54  
55  
56  
57  
58  
59  
60

1  
2  
3  
4  
5  
6  
7  
8  
9  
10  
11  
12  
13  
14  
15  
16  
17  
18  
19  
20  
21  
22  
23  
24  
25  
26  
27  
28  
29  
30  
31  
32  
33  
34  
35  
36  
37  
38  
39  
40  
41  
42  
43  
44  
45  
46

For peer review only

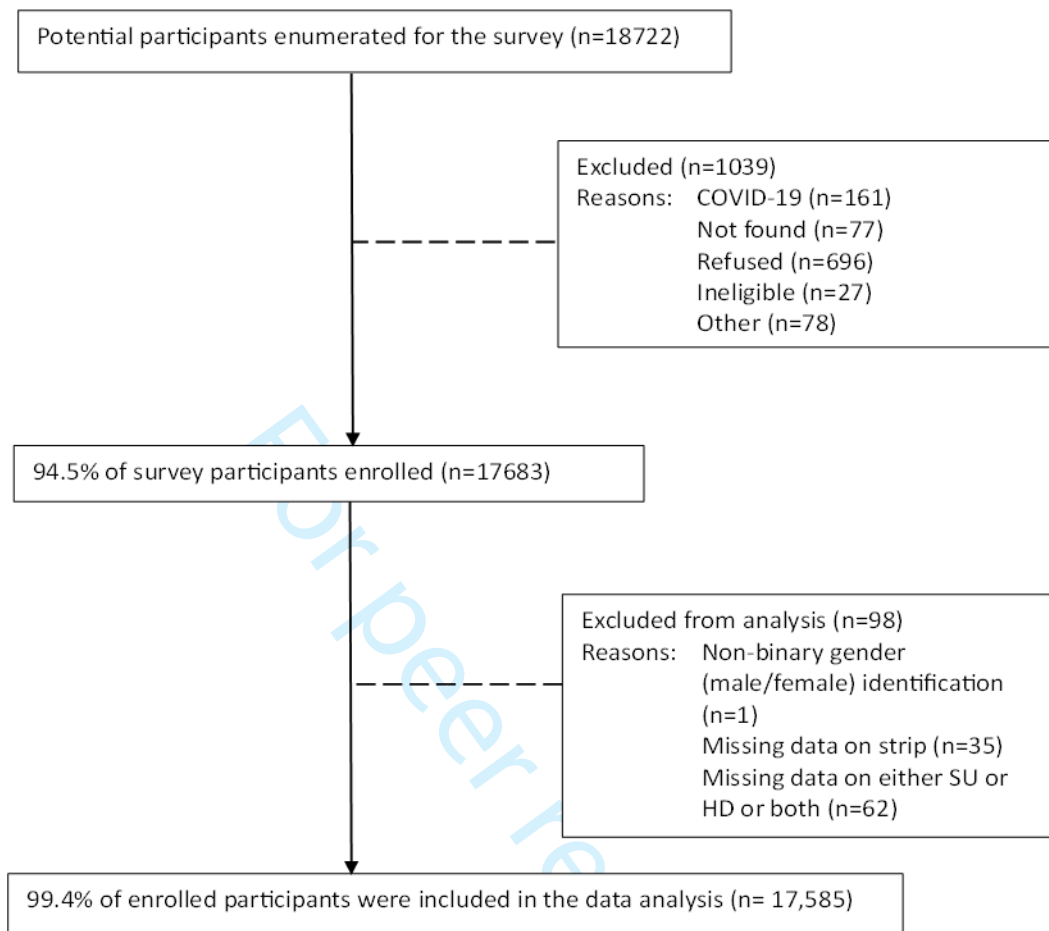

Figure 1: Participants recruitment flow chart

STROBE Statement—Checklist of items that should be included in reports of *cross-sectional studies*

|                           | Item No | Recommendation                                                                                                                                                                                    | Page No |
|---------------------------|---------|---------------------------------------------------------------------------------------------------------------------------------------------------------------------------------------------------|---------|
| <b>Title and abstract</b> | 1       | (a) Indicate the study's design with a commonly used term in the title or the abstract                                                                                                            | 2       |
|                           |         | (b) Provide in the abstract an informative and balanced summary of what was done and what was found                                                                                               | 2       |
| <b>Introduction</b>       |         |                                                                                                                                                                                                   |         |
| Background/rationale      | 2       | Explain the scientific background and rationale for the investigation being reported                                                                                                              | 5       |
| Objectives                | 3       | State specific objectives, including any prespecified hypotheses                                                                                                                                  | 5       |
| <b>Methods</b>            |         |                                                                                                                                                                                                   |         |
| Study design              | 4       | Present key elements of study design early in the paper                                                                                                                                           | 6       |
| Setting                   | 5       | Describe the setting, locations, and relevant dates, including periods of recruitment, exposure, follow-up, and data collection                                                                   | 6       |
| Participants              | 6       | (a) Give the eligibility criteria, and the sources and methods of selection of participants                                                                                                       | 6       |
| Variables                 | 7       | Clearly define all outcomes, exposures, predictors, potential confounders, and effect modifiers. Give diagnostic criteria, if applicable                                                          | 7       |
| Data sources/measurement  | 8*      | For each variable of interest, give sources of data and details of methods of assessment (measurement). Describe comparability of assessment methods if there is more than one group              | 6-7     |
| Bias                      | 9       | Describe any efforts to address potential sources of bias                                                                                                                                         | n/a     |
| Study size                | 10      | Explain how the study size was arrived at                                                                                                                                                         | n/a     |
| Quantitative variables    | 11      | Explain how quantitative variables were handled in the analyses. If applicable, describe which groupings were chosen and why                                                                      | 6-7     |
| Statistical methods       | 12      | (a) Describe all statistical methods, including those used to control for confounding                                                                                                             | 8       |
|                           |         | (b) Describe any methods used to examine subgroups and interactions                                                                                                                               | 8       |
|                           |         | (c) Explain how missing data were addressed                                                                                                                                                       | 9       |
|                           |         | (d) If applicable, describe analytical methods taking account of sampling strategy                                                                                                                | 8       |
|                           |         | (e) Describe any sensitivity analyses                                                                                                                                                             | n/a     |
| <b>Results</b>            |         |                                                                                                                                                                                                   |         |
| Participants              | 13*     | (a) Report numbers of individuals at each stage of study—eg numbers potentially eligible, examined for eligibility, confirmed eligible, included in the study, completing follow-up, and analysed | 9       |
|                           |         | (b) Give reasons for non-participation at each stage                                                                                                                                              | 9       |
|                           |         | (c) Consider use of a flow diagram                                                                                                                                                                | 9       |
| Descriptive data          | 14*     | (a) Give characteristics of study participants (eg demographic, clinical, social) and information on exposures and potential confounders                                                          | 9       |
|                           |         | (b) Indicate number of participants with missing data for each variable of interest                                                                                                               | 9       |
| Outcome data              | 15*     | Report numbers of outcome events or summary measures                                                                                                                                              | 11-13   |



1  
2  
3  
4  
5  
6  
7  
8  
9  
10  
11  
12  
13  
14  
15  
16  
17  
18  
19  
20  
21  
22  
23  
24  
25  
26  
27  
28  
29  
30  
31  
32  
33  
34  
35  
36  
37  
38  
39  
40  
41  
42  
43  
44  
45  
46  
47  
48  
49  
50  
51  
52  
53  
54  
55  
56  
57  
58  
59  
60

|                          |    |                                                                                                                                                                                                              |       |
|--------------------------|----|--------------------------------------------------------------------------------------------------------------------------------------------------------------------------------------------------------------|-------|
| Main results             | 16 | (a) Give unadjusted estimates and, if applicable, confounder-adjusted estimates and their precision (eg, 95% confidence interval). Make clear which confounders were adjusted for and why they were included | 13-14 |
|                          |    | (b) Report category boundaries when continuous variables were categorized                                                                                                                                    | n/a   |
|                          |    | (c) If relevant, consider translating estimates of relative risk into absolute risk for a meaningful time period                                                                                             | n/a   |
| Other analyses           | 17 | Report other analyses done—eg analyses of subgroups and interactions, and sensitivity analyses                                                                                                               | n/a   |
| <b>Discussion</b>        |    |                                                                                                                                                                                                              |       |
| Key results              | 18 | Summarise key results with reference to study objectives                                                                                                                                                     | 15    |
| Limitations              | 19 | Discuss limitations of the study, taking into account sources of potential bias or imprecision. Discuss both direction and magnitude of any potential bias                                                   | 18    |
| Interpretation           | 20 | Give a cautious overall interpretation of results considering objectives, limitations, multiplicity of analyses, results from similar studies, and other relevant evidence                                   | 15-19 |
| Generalisability         | 21 | Discuss the generalisability (external validity) of the study results                                                                                                                                        | 18    |
| <b>Other information</b> |    |                                                                                                                                                                                                              |       |
| Funding                  | 22 | Give the source of funding and the role of the funders for the present study and, if applicable, for the original study on which the present article is based                                                | 20    |

\*Give information separately for exposed and unexposed groups.

**Note:** An Explanation and Elaboration article discusses each checklist item and gives methodological background and published examples of transparent reporting. The STROBE checklist is best used in conjunction with this article (freely available on the Web sites of PLoS Medicine at <http://www.plosmedicine.org/>, Annals of Internal Medicine at <http://www.annals.org/>, and Epidemiology at <http://www.epidem.com/>). Information on the STROBE Initiative is available at [www.strobe-statement.org](http://www.strobe-statement.org).

# BMJ Open

## Prevalence of substance and hazardous alcohol use and their association with risky sexual behaviour among youth: findings from a population-based survey in Zimbabwe

|                                 |                                                                                                                                                                                                                                                                                                                                                                                                                                                                                                                                                                                                                                                                                                                                                                                                                                                                                                                                                                                                                                                                                                                                                                                           |
|---------------------------------|-------------------------------------------------------------------------------------------------------------------------------------------------------------------------------------------------------------------------------------------------------------------------------------------------------------------------------------------------------------------------------------------------------------------------------------------------------------------------------------------------------------------------------------------------------------------------------------------------------------------------------------------------------------------------------------------------------------------------------------------------------------------------------------------------------------------------------------------------------------------------------------------------------------------------------------------------------------------------------------------------------------------------------------------------------------------------------------------------------------------------------------------------------------------------------------------|
| Journal:                        | <i>BMJ Open</i>                                                                                                                                                                                                                                                                                                                                                                                                                                                                                                                                                                                                                                                                                                                                                                                                                                                                                                                                                                                                                                                                                                                                                                           |
| Manuscript ID                   | bmjopen-2023-080993.R1                                                                                                                                                                                                                                                                                                                                                                                                                                                                                                                                                                                                                                                                                                                                                                                                                                                                                                                                                                                                                                                                                                                                                                    |
| Article Type:                   | Original research                                                                                                                                                                                                                                                                                                                                                                                                                                                                                                                                                                                                                                                                                                                                                                                                                                                                                                                                                                                                                                                                                                                                                                         |
| Date Submitted by the Author:   | 15-Mar-2024                                                                                                                                                                                                                                                                                                                                                                                                                                                                                                                                                                                                                                                                                                                                                                                                                                                                                                                                                                                                                                                                                                                                                                               |
| Complete List of Authors:       | HLAHLA, KUDZAI; Biomedical Research and Training Institute; University of Zimbabwe Faculty of Medicine and Health Sciences<br>Azizi, Steven Chifundo; Biomedical Research and Training Institute; London School of Hygiene & Tropical Medicine<br>Simms, Victoria; Biomedical Research and Training Institute; London School of Hygiene & Tropical Medicine<br>Dziva Chikwari, Chido; Biomedical Research and Training Institute; London School of Hygiene & Tropical Medicine<br>Dauya, E; Biomedical Research and Training Institute<br>Bandason , Tsitsi; Biomedical Research and Training Institute<br>Tembo, Mandikudza ; Biomedical Research and Training Institute; London School of Hygiene & Tropical Medicine<br>Mavodza, Constanca ; Biomedical Research and Training Institute; London School of Hygiene & Tropical Medicine, Department of Public Health, Environments and Society<br>Kranzer, Katharina; Biomedical Research and Training Institute; London School of Hygiene & Tropical Medicine, Clinical Research Department<br>Ferrand, Rashida; Biomedical Research and Training Institute; London School of Hygiene & Tropical Medicine, Clinical Research Department |
| <b>Primary Subject Heading</b>: | Addiction                                                                                                                                                                                                                                                                                                                                                                                                                                                                                                                                                                                                                                                                                                                                                                                                                                                                                                                                                                                                                                                                                                                                                                                 |
| Secondary Subject Heading:      | Addiction, HIV/AIDS, Public health, Sexual health                                                                                                                                                                                                                                                                                                                                                                                                                                                                                                                                                                                                                                                                                                                                                                                                                                                                                                                                                                                                                                                                                                                                         |
| Keywords:                       | Adolescents < Adolescent, Behavior, HIV & AIDS < INFECTIOUS DISEASES, Substance misuse < PSYCHIATRY, Risk Factors                                                                                                                                                                                                                                                                                                                                                                                                                                                                                                                                                                                                                                                                                                                                                                                                                                                                                                                                                                                                                                                                         |
|                                 |                                                                                                                                                                                                                                                                                                                                                                                                                                                                                                                                                                                                                                                                                                                                                                                                                                                                                                                                                                                                                                                                                                                                                                                           |

SCHOLARONE™  
Manuscripts

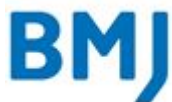

I, the Submitting Author has the right to grant and does grant on behalf of all authors of the Work (as defined in the below author licence), an exclusive licence and/or a non-exclusive licence for contributions from authors who are: i) UK Crown employees; ii) where BMJ has agreed a CC-BY licence shall apply, and/or iii) in accordance with the terms applicable for US Federal Government officers or employees acting as part of their official duties; on a worldwide, perpetual, irrevocable, royalty-free basis to BMJ Publishing Group Ltd ("BMJ") its licensees and where the relevant Journal is co-owned by BMJ to the co-owners of the Journal, to publish the Work in this journal and any other BMJ products and to exploit all rights, as set out in our [licence](#).

The Submitting Author accepts and understands that any supply made under these terms is made by BMJ to the Submitting Author unless you are acting as an employee on behalf of your employer or a postgraduate student of an affiliated institution which is paying any applicable article publishing charge ("APC") for Open Access articles. Where the Submitting Author wishes to make the Work available on an Open Access basis (and intends to pay the relevant APC), the terms of reuse of such Open Access shall be governed by a Creative Commons licence – details of these licences and which [Creative Commons](#) licence will apply to this Work are set out in our licence referred to above.

Other than as permitted in any relevant BMJ Author's Self Archiving Policies, I confirm this Work has not been accepted for publication elsewhere, is not being considered for publication elsewhere and does not duplicate material already published. I confirm all authors consent to publication of this Work and authorise the granting of this licence.

1  
2  
3  
4  
5  
6  
7  
8  
9  
10  
11  
12  
13  
14  
15  
16  
17  
18  
19  
20  
21  
22  
23  
24  
25  
26  
27  
28  
29  
30  
31  
32  
33  
34  
35  
36  
37  
38  
39  
40  
41  
42  
43  
44  
45  
46  
47  
48  
49  
50  
51  
52  
53  
54  
55  
56  
57  
58  
59  
60

## Prevalence of substance and hazardous alcohol use and their association with risky sexual behaviour among youth: findings from a population-based survey in Zimbabwe

Kudzai Hlahla<sup>1,2,\*</sup>, Steven Chifundo Azizi<sup>1,3,\*</sup>, Victoria Simms<sup>1,3</sup>, Chido Dziva Chikwari<sup>1,3</sup>, Ethel Dauya<sup>1</sup>, Tsitsi Bandason<sup>1</sup>, Mandikudza Tembo<sup>1,3</sup>, Constanica Vimbayi Mavodza<sup>1,4</sup>, Katharina Kranzer<sup>1,5,6</sup>, Rashida Abbas Ferrand<sup>1,5</sup>

1. Biomedical Research and Training Institute, Harare, Zimbabwe
2. Clinical Trials Research Centre, University of Zimbabwe Faculty of Medicine and Health Sciences, Harare Zimbabwe
3. MRC International Statistics and Epidemiology Group, London School of Hygiene & Tropical Medicine, London, UK
4. Department of Public Health, Environments and Society, Faculty of Public Health and Policy, London School of Hygiene & Tropical Medicine, London, UK
5. Clinical Research Department, London School of Hygiene & Tropical Medicine, London, UK
6. Division of Infectious Diseases and Tropical Medicine, Medical Center of the University of Munich, Munich, Germany

\* Equal first authors

### Email addresses of authors:

Kudzai Hlahla: [khlahla@uz-ctrc.org](mailto:khlahla@uz-ctrc.org)

Steven Azizi: [steve\\_aziz@hotmail.com](mailto:steve_aziz@hotmail.com)

Victoria Simms: [victoria.simms@lshtm.ac.uk](mailto:victoria.simms@lshtm.ac.uk)

Chido Dziva Chikwari: [Chido.DzivaChikwari@lshtm.ac.uk](mailto:Chido.DzivaChikwari@lshtm.ac.uk)

Ethel Dauya: [edauya@brti.co.zw](mailto:edauya@brti.co.zw)

Tsitsi Bandason: [tbandason@brti.co.zw](mailto:tbandason@brti.co.zw)

Mandikudza Tembo: [Mandikudza.Tembo@lshtm.ac.uk](mailto:Mandikudza.Tembo@lshtm.ac.uk)

Constanica Mavodza: [Constanica-Vimbayi.Mavodza@lshtm.ac.uk](mailto:Constanica-Vimbayi.Mavodza@lshtm.ac.uk)

Katharina Kranzer: [katharina.kranzer@lshtm.ac.uk](mailto:katharina.kranzer@lshtm.ac.uk)

Rashida Ferrand: [Rashida.Ferrand@lshtm.ac.uk](mailto:Rashida.Ferrand@lshtm.ac.uk)

### § Corresponding Author:

Rashida Ferrand

Biomedical Research and Training Institute

10, Seagrave Road,

Harare,

Zimbabwe

Email: [Rashida.Ferrand@lshtm.ac.uk](mailto:Rashida.Ferrand@lshtm.ac.uk)

## ABSTRACT

### Introduction

Hazardous drinking (HD) and substance use (SU) can lead to disinhibited behaviour and are both growing public health problems among Southern African youths. We investigated the prevalence of SU and HD and their association with risky sexual behaviour among youth in Zimbabwe.

### Methods

A population-based survey of youth aged 18-24 years in three provinces in Zimbabwe was conducted between October 2021 and June 2022. A questionnaire collected data on HD (defined as an AUDIT score  $\geq 8$ ), ever use of substances, and sexual behaviour. Multi-level mixed effects generalized linear modelling was used to determine associations between SU/HD and risky sexual behaviour.

### Results

Of 17585 participants eligible for this analysis, 61% were female and the median age was 20 (IQR:19, 22) years. Overall, 4.5% and 7.0% of participants reported HD and SU respectively. Males had a substantially higher prevalence than females of HD (8.2% vs 1.9%) and SU (15.1% vs 1.5%). Among males, after adjusting for socio-demographic factors, we found increased odds of having >1 sexual partner in those who engaged in SU (aOR=2.67, 95%CI=2.21-3.22), HD (aOR=3.40, 95%CI=2.71-4.26) and concurrent HD and SU (aOR=4.57, 95% CI=3.59-5.81) compared to those who did not engage in HD or SU. Similarly, there was increased odds of receiving/providing transactional sex among males who engaged in SU (aOR=2.51, 95%CI=1.68-3.74), HD (aOR=3.60, 95%CI=2.24-5.79), and concurrent HD and SU (aOR=7.74, 95%CI=5.44-11.0). Substance use was associated with 22% increased odds of inconsistent

1  
2  
3 condom use in males (aOR=1.22, 95% CI=1.03-1.47). In females, the odds of having >1 sexual  
4  
5 partner and having transactional sex were also increased amongst those who engaged in SU  
6  
7 and HD.  
8  
9

## 10 **Conclusions**

11  
12 SU and HD are associated with sexual behaviours that increase the risk of HIV acquisition in  
13  
14 youth. Sexual and reproductive health interventions must consider HD and SU as potential  
15  
16 drivers of risky sexual behaviour in youths.  
17  
18  
19  
20  
21  
22

23 **Keywords: Substance use, hazardous alcohol, youth, HIV, Africa, sexual behavior**  
24  
25  
26  
27  
28  
29  
30  
31  
32  
33  
34  
35  
36  
37  
38  
39  
40  
41  
42  
43  
44  
45  
46  
47  
48  
49  
50  
51  
52  
53  
54  
55  
56  
57  
58  
59  
60

### STRENGTHS AND LIMITATIONS OF THIS STUDY

- The study had a large sample size and was adequately powered to detect prevalence and associations measured.
- Participants were randomly selected, and participation rates were high, minimising selection bias.
- The cross-sectional nature of the study does not allow us to establish causality, or the temporality of associations observed.
- Use of self-reported measures may result in underreporting of alcohol and substance use, as well as risky sexual behaviours.
- The study was conducted in urban and peri-urban settings and is therefore not representative of rural settings.

## INTRODUCTION

Hazardous drinking (HD) and substance use (SU) are of increasing public health concern (1). Globally, an estimated 2.8 million deaths were attributed to alcohol use whilst 425,000 deaths were estimated to have been caused by SU between 1990 and 2016 (2). Alcohol is the most used substance globally while SU, defined as the use of illicit drugs such as opioids, cannabis, amphetamines, and cocaine is on the increase in Sub-Saharan Africa (SSA) (2–8). In 2016 Southern Africa had the second highest age-standardised burden of disease attributable to alcohol, after Eastern Europe (2). Current SU by adolescents in many countries has been reported to be higher than lifetime use in previous generations, with SU among adolescents and young people being predicted to increase in the African continent by 40% by 2030 (9).

Adolescence and young adulthood are periods of rapid physical, psychosocial and cognitive development due to the increasing complexity in brain development that occurs. Brain development during adolescence is characterised by slower development of the prefrontal cortex, that processes cognitive and emotional information such as prioritizing, planning, rational decision making and self-regulation(10). In contrast, there is rapid development of the limbic system that regulates emotions, sensation seeking and determining reward and punishment(10). This developmental disconnect in the brain is thought to result in experimentation and sensation seeking that may result in risk-taking behaviour during adolescence and young adulthood(10). Although an essential facet of cognitive development and maturity, such experimentation and risk-taking may include the hazardous use of alcohol and substances as well as sexual behaviour that increases an individual's risk of unintended pregnancy and transmission of sexually transmitted infections (STI) such as HIV (11,12). SU and HD impairs cognitive functioning in a variety of ways including causing impaired decision making, reduced risk perception and disinhibition (12–14). SU and HD may alter the



1  
2  
3 individual's perception of pleasure experienced from having sex under the influence of  
4  
5 intoxicating substances, as well as physically limit an individual's ability to think of and take  
6  
7 protective measures resulting in increased risk of contracting HIV and other sexually  
8  
9 transmitted infections (1,11,14).  
10  
11  
12  
13  
14

15 Studies conducted among adolescents and young adults have shown an association between  
16  
17 high alcohol consumption and use of illicit substances with risky sexual behaviour including  
18  
19 inconsistent condom use and having multiple sexual partners (15,16). However, most of these  
20  
21 studies have been conducted in high income countries in Europe, Asia, and the United States.  
22  
23 On conducting a literature search, we found very few studies that have been conducted,  
24  
25 investigating HD, SU and its association with risky sexual behaviour within the African context,  
26  
27 with the few studies that we did find being done in specific populations such as orphans,  
28  
29 children and youth residing in the streets or in informal settlements (1,17,18). There is a  
30  
31 dearth of data on SU and HD among Zimbabwean youth specifically and to our knowledge,  
32  
33 there has been no study conducted to determine the prevalence of HD and SU on a  
34  
35 population-based level, and its association with risky sexual behaviour. The intersection  
36  
37 between SU and HD and sexual behaviours is of particular concern in Southern Africa, which  
38  
39 has the highest HIV prevalence of any global subregion (19). This study therefore aimed to  
40  
41 determine the prevalence of HD and SU and its association with sexual behaviour among  
42  
43 youth, a population at particularly high risk of HIV and STI, in Zimbabwe (20,21).  
44  
45  
46  
47  
48  
49  
50  
51  
52  
53  
54  
55  
56  
57  
58  
59  
60

## METHODS

### Study design and study setting

This study used data from a population-based survey conducted to ascertain the outcome of a cluster-randomised trial (CHIEDZA) [Trial Registration number: NCT03719521]. The trial protocol has been published elsewhere (20). Briefly the CHIEDZA trial was conducted in three provinces (Harare, Bulawayo, and Mashonaland East), each with 8 clusters (defined as geographically demarcated areas) randomised 4:4 to either standard of care (existing facility-based health services) or the intervention which was integrated community based HIV and sexual and reproductive health service provision (20). The trial outcomes were ascertained through a cross-sectional population-based survey, conducted in Harare (October– December 2021), Bulawayo (January– March 2022) and Mashonaland East (April– June 2022) aiming to recruit 16,800 youths, aged 18-24 years (700 per cluster).

### Survey methods

A multi-stage sampling method was employed in the survey: buildings within each cluster were mapped using satellite images on Openstreetmap, and ARCGIS was used to segment streets into short sections (roughly 100-200 meters long). Selected street sections were randomly sampled, and all residents within these sections were listed. Individuals aged 18-24 years living in the mapped sections were invited to participate in the survey.

An interviewer-administered questionnaire collected socio-demographic data, participants' sexual behaviour, knowledge of and use of HIV prevention methods, mental health, and experience of violence. The Alcohol Use Disorders Identification Test (AUDIT) was used to screen for alcohol use disorder (22). This is a 10-item internationally validated tool developed

1  
2  
3 by the World Health Organization (WHO) and the most widely used alcohol screening  
4  
5 instrument globally. The frequency of use and range of substances commonly used in the local  
6  
7 setting was recorded. This questionnaire specified drugs by category, as drugs that are  
8  
9 smoked (e.g. weed, dagga, ganja), orally ingested (ganja cake or popcorn, prescription drugs  
10  
11 such as cough syrup), sniffed or inhaled (e.g. glue, cocaine) or injected (excluding medical  
12  
13 drugs like insulin).  
14  
15

16  
17  
18 Survey data were collected onto encrypted and password-protected electronic tablets using  
19  
20 SurveyCTO (Cambridge, USA) and uploaded to a secure SurveyCTO server at the end of each  
21  
22 day. Data was downloaded and stored onto a password-controlled and secure Biomedical  
23  
24 Research and Training Institute (BRTI) Microsoft SQL Server and managed using Microsoft  
25  
26 Access as the front-end and with access limited to defined study personnel.  
27  
28  
29  
30  
31

### 32 ***Explanatory and outcome variables***

33  
34  
35 An AUDIT score of 8 was used as the cut off in accordance to WHO guidelines, with a score of  
36  
37 8 and above being indicative of HD and harmful alcohol use (22). Substance use was defined  
38  
39 as ever use of one or more of the substances listed above. The outcome was sexual risk  
40  
41 behaviour. Sexual risk behaviour was assessed using three self-reported indicators: (i)  
42  
43 condom use during vaginal and anal sex in the past 12 months (ii) having more than one sexual  
44  
45 partner in the past 12 months, and (iii) receiving or providing transactional sex as defined by  
46  
47 receiving or providing money or help to pay for their expenses or favour in order to enter or  
48  
49 remain in a sexual relationship in the past 12 months. The sociodemographic variables were  
50  
51 categorised as follows: Age was divided into two groups, 18-20 years and 21-24 years. Marital  
52  
53 status was categorised as 'never married' and 'ever married', distinguishing individuals based  
54  
55 on their marital history. The education level was defined by three ascending categories: 'up  
56  
57  
58  
59  
60

1  
2  
3 to primary school', 'secondary school', and 'post-secondary school'. Employment status was  
4  
5 categorised as either 'in school or formal employment' or 'informal employment or  
6  
7 unemployed', differentiating individuals by their participation in structured employment or  
8  
9 education. Lastly, the wealth quintile ranked individuals into five levels from 'poorest' to  
10  
11 'richest', based on household assets. These quintiles were calculated using principal  
12  
13 components analysis (PCA) to assign weights to household assets (Fridge, bicycle, vehicle,  
14  
15 radio, microwave, cell phone and Computer or laptop or tablet). Each household was then  
16  
17 given a factor score that placed it on a continuous scale of relative wealth. These scores were  
18  
19 standardised to a mean of zero and a standard deviation of one and were used to divide the  
20  
21 sample into five equal parts, known as quintiles. These quintiles represented varying levels of  
22  
23 wealth, from the lowest (poorest) to the highest (richest).  
24  
25  
26  
27  
28  
29  
30  
31  
32

### 33 **Data analysis**

34  
35 Data analysis was performed using STATA version 17 (StatCorp, Texas, USA). The prevalence  
36  
37 of SU, HD and concurrent SU and HD among males and females was calculated. To assess the  
38  
39 effect of HD and SU on risky sexual behaviour, a forward-stepwise multivariable regression  
40  
41 analysis using a multi-level mixed-effects generalized linear model was used. This model was  
42  
43 selected due to the multistage sampling with stratification and unequal sampling probabilities  
44  
45 for the clusters because they had different numbers of youth residents (23). The analyses  
46  
47 were stratified by sex given the difference in prevalence of SU and HD. Data analysis was  
48  
49 conducted using the "meglm" command in STATA, which allows for the incorporation of  
50  
51 weights in the analysis and utilizes a pseudolikelihood approach to account for the inverse  
52  
53 probability weights. This method is known for providing robust standard errors when  
54  
55 sampling weights are present. Age group was considered an *a priori* confounder and the final  
56  
57  
58  
59  
60

1  
2  
3 models were adjusted for sociodemographic characteristics and trial arm as the intervention  
4  
5 could have had an effect on sexual behaviours.  
6  
7  
8  
9

### 10 **Patient and public involvement**

11  
12 The research question was informed by reports by health providers, local policy makers,  
13  
14 community members and community leaders of increasing levels of substance use,  
15  
16 particularly among youth. Youth were involved in the design and delivery of the CHIEDZA  
17  
18 intervention. The participant information video used for the informed consent process was  
19  
20 co-designed with youth, and the questionnaire was developed and piloted with youth.  
21  
22 Results of the CHIEDZA have been disseminated to study communities through multiple  
23  
24 community events. A detailed mixed methods process evaluation was embedded in the  
25  
26 CHIEDZA trial and data collection was undertaken by trained youth researchers.  
27  
28  
29  
30  
31  
32  
33  
34  
35  
36  
37  
38  
39

### 40 **Ethical considerations**

41  
42 Ethical approval was obtained from the Medical Research Council of Zimbabwe (reference  
43  
44 number: MRCZ/A/2387), the Institutional Review Board of the Biomedical Research and  
45  
46 Training Institute (reference number: AP149/2018), and the London School of Hygiene &  
47  
48 Tropical Medicine (LSHTM) Research Ethics Committee (reference number: 12063).  
49  
50 Participants viewed an information video about the study (in either English, Shona or  
51  
52 Ndebele) on a tablet. Consent was documented electronically on a tablet, with participants  
53  
54 retaining a signed paper copy for their records (20).  
55  
56  
57  
58  
59  
60

## RESULTS

A total of 17,683 participants were surveyed, with one participant excluded from data analysis due to being the only one with non-binary gender identification (and therefore not possible to categorize for analyses), 35 youths excluded due to missing data, and 62 with missing values on either SU or HD (see Fig 1). Overall, 17,585 participants were eligible for analysis (Fig 1). The median age of participants was 20 years (IQR: 19, 22) and 61% were female.

### Prevalence of HD and SU

Of the 17585 participants eligible for analysis, 15828 (90.3%) were non-substance users and non-hazardous drinkers. Overall, 816 participants were hazardous drinkers and 1,254 were substance users. The overall prevalence of HD was 4.5% (95% CI: 4.1, 4.9) and of SU was 7.0% (95%CI: 6.5, 7.6), with the prevalence of concurrent HD and SU being 1.8% (95% CI: 1.5, 2.0). Males (591) had a higher prevalence than females (225) of HD (8.2% vs 1.9%). Similarly, a higher proportion of males 1,070 (15.1%) were substance users compared to females 184 (1.5%). Concurrent HD and SU was reported by 262 (3.7%) males and 51 (0.4%) of females. Weed or Ganja was the most prevalent substance used in both men (14.5%) and women (1.06%), followed by swallowed drugs (1.67% in men vs 0.35% in women) and prescription drugs (1.65% in men vs 0.31% in women)

Among males, HD and SU was more common in older youth (21-24 years), ever married, in a higher wealth quintile and in those who were informally employed/unemployed compared to being in school or in formal employment (Table 1). In contrast, in females, HD and SU were more prevalent among those who were never married compared to those that had ever been married, in those who had a post-secondary school education, and in those who were in

1  
2  
3  
4  
5  
6  
7  
8  
9  
10  
11  
12  
13  
14  
15  
16  
17  
18  
19  
20  
21  
22  
23  
24  
25  
26  
27  
28  
29  
30  
31  
32  
33  
34  
35  
36  
37  
38  
39  
40  
41  
42  
43  
44  
45  
46  
47  
48  
49  
50  
51  
52  
53  
54  
55  
56  
57  
58  
59  
60

school or formal employment compared to those who were unemployed/informally employed (Table 2).

For peer review only

**Table 1: Substance and hazardous alcohol use of male participants against sociodemographic and economic characteristics of participants, by sex**

| Variable                          | Males          |                                   |                                   |                                   |                                 |
|-----------------------------------|----------------|-----------------------------------|-----------------------------------|-----------------------------------|---------------------------------|
|                                   | No SU or HD    | SU only                           | HD only                           | HD and SU                         |                                 |
|                                   | N <sup>§</sup> | n <sup>§</sup> (%) <sup>†</sup>   | n <sup>§</sup> (%) <sup>†</sup>   | n <sup>§</sup> (%) <sup>†</sup>   | n <sup>§</sup> (%) <sup>†</sup> |
| Total                             | 6884           | 5485 (80.4)<br>[95%CI:79.1, 81.7] | 808 (11.4)<br>[95%CI: 10.4, 12.4] | 329 (4.49)<br>[95%CI: 3.93, 5.13] | 262 (3.71) [95%CI: 3.22, 4.28]  |
| Age category in years             |                |                                   |                                   |                                   |                                 |
| 18-20                             | 3825           | 3231(84.8)                        | 381(9.7)                          | 121(3.2)                          | 92(2.3)                         |
| 21-24                             | 3059           | 2254(74.8)                        | 427(13.5)                         | 208(6.2)                          | 170(5.5)                        |
| Marital status                    |                |                                   |                                   |                                   |                                 |
| Never married                     | 6528           | 5242(81.0)                        | 759(11.3)                         | 292(4.2)                          | 235(3.5)                        |
| Ever married                      | 356            | 243(71.4)                         | 49(11.5)                          | 37(9.8)                           | 27(7.3)                         |
| Education level                   |                |                                   |                                   |                                   |                                 |
| Up to Primary school              | 248            | 190(76.0)                         | 32(12.6)                          | 12(4.8)                           | 14(6.6)                         |
| Secondary school                  | 6002           | 4790(80.8)                        | 713(11.4)                         | 274(4.2)                          | 225(3.6)                        |
| Post-secondary schooling          | 634            | 505(78.6)                         | 63(9.9)                           | 43(7.2)                           | 23(4.3)                         |
| Wealth quintile                   |                |                                   |                                   |                                   |                                 |
| Poorest                           | 1148           | 964(85.4)                         | 124(9.9)                          | 29(2.5)                           | 31(2.2)                         |
| Poorer                            | 1192           | 950(81.6)                         | 141(10.4)                         | 58(4.5)                           | 43(3.6)                         |
| Middle                            | 1443           | 1132(79.1)                        | 177(11.9)                         | 68(4.5)                           | 66(4.5)                         |
| Richer                            | 1462           | 1140(77.9)                        | 184(12.8)                         | 83(5.5)                           | 55(3.8)                         |
| Richest                           | 1635           | 1297(78.4)                        | 182(11.8)                         | 89(5.3)                           | 67(4.4)                         |
| Employment                        |                |                                   |                                   |                                   |                                 |
| In school or formal employment    | 2824           | 2386(84.5)                        | 247(8.8)                          | 117(4.0)                          | 74(2.7)                         |
| Informal employment or unemployed | 4060           | 3099(77.8)                        | 561(13.0)                         | 212(4.8)                          | 188(4.4)                        |

<sup>†</sup>weighted percent, <sup>§</sup>unweighted count



**Table 2: Substance and hazardous alcohol use of female participants against sociodemographic and economic characteristics of participants, by sex**

| Variable                          | Females        |                                     |                                   |                                   |                                 |
|-----------------------------------|----------------|-------------------------------------|-----------------------------------|-----------------------------------|---------------------------------|
|                                   |                | No SU or HD                         | SU only                           | HD only                           | HD and SU                       |
|                                   | N <sup>§</sup> | n <sup>§</sup> (%) <sup>†</sup>     | n <sup>§</sup> (%) <sup>†</sup>   | n <sup>§</sup> (%) <sup>†</sup>   | n <sup>§</sup> (%) <sup>†</sup> |
| Total                             | 10701          | 10343 (97.0)<br>[95%CI: 96.6, 97.3] | 133 (1.12)<br>[95%CI: 0.91, 1.37] | 174 (1.49)<br>[95%CI: 1.26, 1.77] | 51 (0.41) [95%CI: 0.30, 0.56]   |
| Age category in years             |                |                                     |                                   |                                   |                                 |
| 18-20                             | 5374           | 5213(97.3)                          | 67(1.2)                           | 66(1.1)                           | 28(0.4)                         |
| 21-24                             | 5327           | 5130(96.7)                          | 66 (1.0)                          | 108(1.9)                          | 23(0.4)                         |
| Marital status                    |                |                                     |                                   |                                   |                                 |
| Never married                     | 6712           | 6448(96.5)                          | 101(1.3)                          | 124(1.7)                          | 39(0.5)                         |
| Ever married                      | 3989           | 3895(97.7)                          | 32(0.8)                           | 50(1.2)                           | 12(0.3)                         |
| Education level                   |                |                                     |                                   |                                   |                                 |
| Up to Primary school              | 618            | 607(98.3)                           | 3(0.4)                            | 3(0.5)                            | 5(0.8)                          |
| Secondary school                  | 9317           | 9012(97.0)                          | 118(1.1)                          | 146(1.4)                          | 41(0.4)                         |
| Post-secondary schooling          | 766            | 724(95.0)                           | 12(1.4)                           | 25(3.1)                           | 5(0.5)                          |
| Wealth quintile                   |                |                                     |                                   |                                   |                                 |
| Poorest                           | 2499           | 2438(97.9)                          | 21(0.8)                           | 30(1.0)                           | 10(0.3)                         |
| Poorer                            | 2214           | 2150(97.3)                          | 20(0.9)                           | 37(1.6)                           | 7(0.3)                          |
| Middle                            | 2125           | 2065(97.4)                          | 22(0.9)                           | 30(1.4)                           | 8(0.3)                          |
| Richer                            | 1987           | 1914(96.5)                          | 27(1.3)                           | 36(1.7)                           | 10(0.5)                         |
| Richest                           | 1860           | 1763(95.2)                          | 42(2.1)                           | 40(2.0)                           | 15(0.7)                         |
| Employment                        |                |                                     |                                   |                                   |                                 |
| In school or formal employment    | 2934           | 2815(96.5)                          | 49(1.5)                           | 56(1.7)                           | 14(0.3)                         |
| Informal employment or unemployed | 7767           | 7528(97.2)                          | 84 (1.0)                          | 118 (1.4)                         | 37 (0.4)                        |

<sup>†</sup>weighted percent, <sup>§</sup>unweighted count

### Prevalence of risky sexual behaviour in people reporting HD and/or SU

Sexual behaviour of male and female hazardous drinkers and substance users are shown in Supplementary Table 1. Among males, a higher proportion of those who engaged in HD (50.9%), SU (43.8%) and concurrent HD and SU (61.1%) had had more than one sexual partner in the past 12 months compared to those who did not engage in HD or SU (21.4%). Similarly, a higher proportion of males who engaged in HD (6.6%), SU (5.2%) or concurrent SU and HD (13.5%) had received or given transactional sex compared to those who had neither reported HD or SU (1.9%) (Supplementary Table 1). A similar trend was seen among female participants despite the small numbers of females who reported HD, SU and HD and SU.

1  
2  
3 While a lower proportion of sexually active males who engaged in HD and SU used condoms  
4 consistently, the opposite was observed among females, with a higher proportion of female  
5 hazardous drinkers or substance users reporting consistent condom use. Females who  
6 engaged in HD (42.5%), SU (28.9%) and both HD and SU (42.8%) reported consistent condom  
7 use compared to non-hazardous drinkers and substance users (23.2%).  
8  
9  
10  
11  
12  
13  
14  
15  
16  
17

### 18 **Association of hazardous drinking and substance use with sexual behaviour.**

19  
20 Both males and females who engaged in HD and SU had significantly higher odds of having  
21 had more than one sexual partner in the past 12 months and engaging in transactional sex  
22 (Tables 3a and b). In males, after adjusting for socio-demographic factors, there was increased  
23 odds of having >1 sexual partner amongst hazardous drinkers (aOR=3.39, 95%CI=2.70-4.26),  
24 substance users (aOR=2.67, 95%CI=2.21-3.23) and amongst those that did both (aOR=4.57,  
25 95%CI=3.59-5.81) compared to non-hazardous drinkers and substance users. In addition,  
26 when comparing to males who did not engage in HD or SU, there was an increased odds of  
27 receiving/providing transactional sex among hazardous drinkers (aOR=3.62, 95%CI=2.26-  
28 5.79), substance users (aOR=2.49, 95%CI=1.67-3.73) and concurrent hazardous drinkers and  
29 substance users (aOR=7.72, 95%CI=5.42-11.01).  
30  
31  
32  
33  
34  
35  
36  
37  
38  
39  
40  
41  
42  
43  
44  
45  
46  
47  
48  
49  
50  
51  
52  
53  
54  
55  
56  
57  
58  
59  
60

**Table 3a: Association of substance use and hazardous alcohol drinking with sexual risk behaviours in male participants**

| Variable                                            | Sexual risk behaviours                                                            |         |                                                      |         |                                                               |         |
|-----------------------------------------------------|-----------------------------------------------------------------------------------|---------|------------------------------------------------------|---------|---------------------------------------------------------------|---------|
|                                                     | More than one sexual partners<br>in past 12 month (Yes)<br>(N <sup>§</sup> =6761) |         | Transactional sex<br>(Yes)<br>(N <sup>§</sup> =6880) |         | Inconsistent condom<br>use<br>(Yes)<br>(N <sup>§</sup> =3729) |         |
|                                                     | aOR <sup>†</sup> (95 CI%)                                                         | p-value | aOR <sup>†</sup> (95 CI%)                            | p-value | aOR <sup>††</sup> (95 CI%)                                    | p-value |
| Non substance use and non hazardous alcohol drinker | Reference                                                                         |         | Reference                                            |         | Reference                                                     |         |
| Substance user only                                 | 2.67(2.21, 3.22)                                                                  | <0.001  | 2.51(1.68, 3.74)                                     | <0.001  | 1.22(1.03, 1.47)                                              | 0.024   |
| Hazardous alcohol drinker only                      | 3.40(2.71, 4.28)                                                                  | <0.001  | 3.60(2.24, 5.79)                                     | <0.001  | 0.84(0.57, 1.24)                                              | 0.376   |
| Both hazardous alcohol drinker and substance user   | 4.57(3.59, 5.81)                                                                  | <0.001  | 7.74(5.44, 11.0)                                     | <0.001  | 1.31(0.95, 1.82)                                              | 0.100   |

<sup>†</sup>Odds ratio adjusted for age group, marital status, education level, employment status, trial arm and province; <sup>†</sup>odds ratio adjusted for age group, employment status, wealth quintile, trial arm and province; <sup>††</sup>odds ratio adjusted for age group, marital status, trial arm and employment status, <sup>§</sup>unweighted count,

**Table 3b: Association of substance use and hazardous alcohol drinking with sexual risk behaviours in female participants**

| Variable                                            | Sexual risk behaviours                                                             |         |                                                       |         |                                                               |         |
|-----------------------------------------------------|------------------------------------------------------------------------------------|---------|-------------------------------------------------------|---------|---------------------------------------------------------------|---------|
|                                                     | More than one sexual partners<br>in past 12 month (Yes)<br>(N <sup>§</sup> =10618) |         | Transactional sex<br>(Yes)<br>(N <sup>§</sup> =10701) |         | Inconsistent condom<br>use<br>(Yes)<br>(N <sup>§</sup> =6529) |         |
|                                                     | aOR <sup>†</sup> (95 CI%)                                                          | p-value | aOR <sup>†</sup> (95 CI%)                             | p-value | aOR <sup>††</sup> (95 CI%)                                    | p-value |
| Non substance use and non hazardous alcohol drinker | Reference                                                                          |         | Reference                                             |         | Reference                                                     |         |
| Substance user only                                 | 6.92(4.39, 10.9)                                                                   | <0.001  | 6.62(3.42, 12.8)                                      | <0.001  | 1.16(0.67, 2.03)                                              | 0.589   |
| Hazardous alcohol drinker only                      | 5.61(3.54, 8.87)                                                                   | <0.001  | 7.87(4.48, 13.8)                                      | <0.001  | 0.72(0.53, 0.98)                                              | 0.038   |
| Both hazardous alcohol drinker and substance user   | 9.67(4.37, 21.4)                                                                   | <0.001  | 14.3(6.99, 29.1)                                      | <0.001  | 0.90(0.45, 1.79)                                              | 0.766   |

<sup>†</sup>Odds ratio adjusted for age group, marital status, employment status, education level, trial arm and province, <sup>†</sup>odds ratio adjusted for age group, education level, employment status, trial arm and marital status; <sup>††</sup>odds ratio adjusted for age group, marital status, trial arm, education level, employment status, wealth quintile and province; <sup>§</sup>unweighted count

1  
2  
3  
4  
5  
6 In males but not females, substance use was associated with a 22% increased odds of  
7  
8 inconsistent condom use (aOR=1.22, 95% CI 1.03-1.47). However, in females, HD only was  
9  
10 associated with a 28% decreased odds of inconsistent condom use (aOR=0.72, 95% CI=0.53-  
11  
12 0.98).  
13  
14  
15  
16  
17

## 18 **DISCUSSION**

19  
20 In this population-based survey of Zimbabwean youth, the prevalence of HD, SU and  
21  
22 concurrent HD and SU was high, particularly in males who were older, in a higher wealth  
23  
24 quintile and informally or unemployed. HD and SU were associated with having more than  
25  
26 one sexual partner and having received or provided transactional sex in the past 12 months  
27  
28 in both males and females. SU was associated with inconsistent condom use in males whereas  
29  
30 HD in females was associated with consistent condom use.  
31  
32  
33  
34  
35  
36  
37

38 A systematic review of population based studies conducted between 2000-2016 in sub-  
39  
40 Saharan Africa reported a prevalence of lifetime use of any substance of 37% among  
41  
42 adolescents in Southern Africa (4). The considerable difference in SU prevalence between this  
43  
44 and that reported in our study could be attributed to the inclusion of caffeine as a  
45  
46 psychoactive substance in the systematic review, which is not usually the case in many studies  
47  
48 analysing SU. Cannabis was the most commonly used substance in this study, results that are  
49  
50 similar to other studies that have shown cannabis to be the most frequently used substance  
51  
52 in Zimbabwe and in the Southern African region (24–26). When considering hazardous  
53  
54 drinking, results from our study were higher than those found from a study conducted in  
55  
56 Eastern Africa in 2014, which showed a median prevalence of hazardous drinking of 3%  
57  
58  
59  
60

1  
2  
3 among young people 15-24 years of age(27). In Zimbabwe in 2016, the population prevalence  
4 of alcohol use disorders in those 15 years and older was reported to be 6.4% (24).  
5  
6  
7  
8  
9

10 Consistent with our study findings, alcohol and substance use has been reported to be more  
11 prevalent in males than females, with studies showing that current and ever use of substances  
12 can be more than three times higher in males than in females (28–32). Increased HD and SU  
13 in males has been attributed to males having increased access and opportunity to use alcohol  
14 and illicit substance use, cultural roles and expectations surrounding masculinity and alcohol  
15 use or SU and the tendency for men to take part in risky health behaviours such as HD and SU  
16 (29,31–33). It is important to note that the prevalence reported particularly among women,  
17 may be an underestimate due to the stigma attached to alcohol use and SU in this setting,  
18 which may have resulted in social desirability bias (31,34).  
19  
20  
21  
22  
23  
24  
25  
26  
27  
28  
29  
30  
31  
32  
33  
34

35 We found a higher prevalence of HD and SU in males that were in a higher wealth quintile  
36 and those who were either informally employed or unemployed compared to being in school  
37 or having formal employment. Men have a breadwinning role and the higher prevalence of  
38 HD and SU among young men may be a consequence of the lack of opportunities, financial  
39 instability and perceived hopelessness in a fragile economic environment with very high rates  
40 of unemployment particularly among young people (35–38). In addition, increased supply and  
41 access of substances caused by porous borders and potentially the COVID-19 pandemic that  
42 resulted in youths being anxious, depressed or unoccupied because of being away from  
43 school or work due to the lockdowns or loss of employment, may have contributed to HD and  
44 SU in Zimbabwean youths (35,37).  
45  
46  
47  
48  
49  
50  
51  
52  
53  
54  
55  
56  
57  
58  
59  
60

1  
2  
3 Interestingly, HD and SU although generally much less prevalent in women, were found to be  
4 more common in those who were in school or in formal employment. This may reflect  
5 women's ability to access these substances due to their ever-changing economic role in  
6 society that is brought about by education and formal employment, both which give women  
7 the financial means to access differing substances more readily (30).  
8  
9  
10  
11  
12  
13  
14  
15  
16  
17

18 HD and SU were associated with risky sexual behaviour, namely having multiple sexual  
19 partners and transactional sex. This finding is similar to that of other studies that found that  
20 heavy drinking and the use of cannabis and other illicit drugs is associated with an increased  
21 likelihood of having multiple sexual partners and having transactional sex in African youth  
22 (39–43). This may reflect a group that is generally more “risk-taking” and therefore more likely  
23 to engage in both substance use and risky sexual behaviour at this age. HD and SU may also  
24 influence sexual risk behaviour most likely through their disinhibiting effect, resulting in the  
25 inability to reason and make decisions (16,44).  
26  
27  
28  
29  
30  
31  
32  
33  
34  
35  
36  
37  
38  
39

40 Experimental alcohol use and SU as well as sexual behaviour tends to begin during  
41 adolescence and continues into young adulthood as young people gain autonomy and it is  
42 therefore a timely period to intervene to modify behaviours (12,29). Education programmes,  
43 highlighting the dangers of HD and SU, need to start as early as possible, targeting both  
44 children and adolescents with age-appropriate messaging. This could be integrated with  
45 comprehensive sexuality education with a focus on young men, who are a particularly  
46 important target group given that they are generally more likely to engage in higher risk  
47 behaviours.  
48  
49  
50  
51  
52  
53  
54  
55  
56  
57  
58  
59  
60

1  
2  
3 There is also a real scarcity of HD and SU treatment programmes in SSA, with many countries  
4 within the region lacking the capacity to meet the local demand for services(45). Our study  
5 adds to the growing body of literature highlighting the growing problem of HD and SU in  
6 Africa, particularly among young people. Effective and context-appropriate interventions to  
7 address SU and HD are urgently needed. Interventions need to be affordable and accessible  
8 to all, despite gender differences, offering quality services, free from risk of victimisation and  
9 related stigma (28,45). Context-specific research on the range of substances used, the  
10 patterns and drivers of alcohol and substance use and the context and culture of SU and HD  
11 among youth can inform interventions for both prevention and treatment of addiction.  
12  
13  
14  
15  
16  
17  
18  
19  
20  
21  
22  
23  
24  
25  
26  
27

28 Our study highlights the relationship between HD and SU and sexual behaviours and draws  
29 attention to both the need and opportunity for the integration of HD and SU screening in  
30 sexual reproductive health care services and as part of HIV prevention programmes. For  
31 example, when providing sexual health counselling, offering condoms, pre-exposure  
32 prophylaxis or HIV or STI testing, there is an opportunity to screen for and address SU (46,47).  
33 Similarly, it is important to address the sexual health of individuals being treated for HD or  
34 SU.  
35  
36  
37  
38  
39  
40  
41  
42  
43  
44  
45  
46  
47  
48  
49  
50  
51  
52  
53  
54  
55  
56  
57  
58  
59  
60

Our study has a number of strengths, namely the large sample size, and that the estimates  
were derived from a population-based survey. Participants were randomly selected, and  
participation rates were high, minimising selection bias. We acknowledge several limitations:  
due to its cross-sectional nature, we are unable to establish causality, or the temporality of  
associations observed. Use of self-reported measures may result in underreporting of alcohol  
and substance use, as well as risky sexual behaviours. The study was conducted in urban and



1  
2  
3 peri-urban settings and is therefore not representative of rural settings. In addition, we used  
4  
5 a broad measure of substance use, not taking into consideration the frequency or patterns of  
6  
7 substance use in analyses. Frequency and use of different substances (which may have  
8  
9 different effects) were considered a single category.  
10  
11  
12  
13  
14

## 15 **CONCLUSION**

16  
17 In conclusion, this study demonstrates an association between HD, SU and risky sexual  
18  
19 behaviour. There is an urgent need for evidence-based, age, gender and context-appropriate  
20  
21 preventive and treatment interventions targeting HD, SU and sexual behaviour. Importantly  
22  
23 addressing SU and HD should be a core aspect of the HIV prevention toolkit and sexual health  
24  
25 should be integrated within management of SU and HD.  
26  
27  
28  
29  
30  
31  
32  
33  
34  
35  
36  
37  
38  
39  
40  
41  
42  
43  
44  
45  
46  
47  
48  
49  
50  
51  
52  
53  
54  
55  
56  
57  
58  
59  
60

**Availability of data and materials**

The datasets used and/or analysed during the current study are available from the corresponding author on request.

**Authors' contributions**

Kudzai Hlahla conceptualised and is the lead investigator and author of this publication. Steven Azizi and Victoria Simms analysed the data. Rashida Ferrand is the Principal Investigator of the CHIEDZA Trial. Tsitsi Bandason was responsible for data management. Rashida Ferrand, Chido Dziva Chikwari, Ethel Dauya, Mandikudza Tembo, Constanca Mavodza and Katharina Kranzer contributed to the coordination of the study and critical revisions of the manuscript. All authors read and approved the final manuscript.

**Competing interests**

No competing interests.

**Acknowledgements**

The abstract from this paper was presented at INTEREST 2023 in Maputo Mozambique as poster number 113.

The authors would also like to thank all the participants in the study.

**Funding**

The CHIEDZA study was funded by the Wellcome Trust through a Senior Fellowship to RAF (206316/Z/17/Z)

**REFERENCES**

1. Ssekamatte T, Nalugya A, Mugambe RK, Wagaba B, Nakalembe D, Mutebi A, et al. Prevalence and predictors of sex under the influence of psychoactive substances among young people in informal settlements in Kampala, Uganda. *BMC Public Health*. 2023;23(1):801.
2. Degenhardt L, Charlson F, Ferrari A, Santomauro D, Erskine H, Mantilla-Herrara A, et al. The global burden of disease attributable to alcohol and drug use in 195 countries and territories, 1990–2016: a systematic analysis for the Global Burden of Disease Study 2016. *The Lancet Psychiatry*. 2018;5(12):987–1012.
3. Boua PR, Soo CC, Debpuur C, Maposa I, Nkoana S, Mohamed SF, et al. Prevalence and socio-demographic correlates of tobacco and alcohol use in four sub-Saharan African countries: a cross-sectional study of middle-aged adults. *BMC Public Health*. 2021;21(1):1–14.
4. Olawole-Isaac A, Ogundipe O, Amoo EO, Adeloye D. Substance use among adolescents in sub-Saharan Africa: A systematic review and meta-analysis. *SAJCH South African J Child Heal*. 2018;12(Special Issue):S79–84.
5. World Health Organization. Alcohol | WHO | Regional Office for Africa [Internet]. 2010 [cited 2023 Mar 23]. Available from: <https://www.afro.who.int/health-topics/alcohol>
6. WHO Africa. Substance Abuse | WHO | Regional Office for Africa [Internet]. World Health Organization. 2021 [cited 2023 Mar 23]. Available from: <https://www.afro.who.int/health-topics/substance-abuse>

- 1  
2  
3 7. Morojele NK, Ramsoomar L, Dumbili EW, Kapiga S. Adolescent Health Series –  
4 Alcohol, tobacco, and other drug use among adolescents in sub-Saharan Africa: A  
5 narrative review. *Trop Med Int Heal*. 2021;26(12):1528–38.  
6  
7
- 8  
9  
10 8. Jumbe S, Mwenda-Kamninga T, Mwalwimba I, Kalu U-G. Determinants and Effects of  
11 Adolescent Substance Use in Africa: A Systematic Review Protocol. 2020;1–6.  
12
- 13  
14  
15 9. UNODC World Drug Report 2. Global Overview: Drug Demand Drug Supply. Global  
16 Overview : Drug Demand. World Drug Report 2. Global Overview: Drug Demand Drug  
17 Supply. 2022. 107 p.  
18  
19
- 20  
21  
22 10. Lang D. Individual and Family Development, Health, and Well-being. *Individ Fam Dev*  
23 Heal Well-being [Internet]. 2022; Available from:  
24 <https://iastate.pressbooks.pub/individualfamilydevelopment/>  
25  
26  
27
- 28  
29  
30 11. Schantz K. Substance Use and Sexual Risk Taking in Adolescence Risk taking in  
31 adolescence Adolescence: A time for taking chances. 2012;(July):1–9. Available from:  
32 [http://www.actforyouth.net/resources/rf/rf\\_substance\\_0712.pdf](http://www.actforyouth.net/resources/rf/rf_substance_0712.pdf)  
33  
34  
35
- 36  
37  
38 12. Viner RM, Allen NB, Patton GC. Puberty, Developmental Processes, and Health  
39 Interventions. *Dis Control Priorities, Third Ed (Volume 8) Child Adolesc Heal Dev*  
40 [Internet]. 2017 Nov 20 [cited 2022 Oct 20];107–18. Available from:  
41 <https://pubmed.ncbi.nlm.nih.gov/30212144/>  
42  
43  
44
- 45  
46  
47 13. Steele CM, Josephs RA. Alcohol Myopia: Its Prized and Dangerous Effects. *Am Psychol*.  
48 1990;45(8):921–33.  
49
- 50  
51  
52 14. Brook DW, Brook JS, Pahl T, Montoya I. The longitudinal relationship between drug  
53 use and risky sexual behaviors among Colombian adolescents. *Arch Pediatr Adolesc*  
54 *Med*. 2002;156(11):1101–7.  
55  
56  
57
- 58  
59  
60 15. Cho HS, Yang Y. Relationship Between Alcohol Consumption and Risky Sexual

- Behaviors Among Adolescents and Young Adults: A Meta-Analysis. *Int J Public Health*. 2023;68(April).
16. Ritchwood TD, Ford H, DeCoster J, Lochman JE, Sutton M. Risky sexual behavior and substance use among adolescents: A meta-analysis. *Child Youth Serv Rev [Internet]*. 2015;52:74–88. Available from: <http://dx.doi.org/10.1016/j.chilyouth.2015.03.005>
17. Pufall EL, Eaton JW, Robertson L, Mushati P, Nyamukapa C, Gregson S. Education, substance use, and HIV risk among orphaned adolescents in Eastern Zimbabwe. *Vulnerable Child Youth Stud [Internet]*. 2017;12(4):360–74. Available from: <https://doi.org/10.1080/17450128.2017.1332398>
18. Oppong Asante K, Meyer-Weitz A, Petersen I, Asante KO, Meyer-Weitz A, Petersen I. Substance use and risky sexual behaviours among street connected children and youth in Accra, Ghana. *Subst Abuse Treat Prev Policy*. 2014;9:45.
19. HIV/AIDS JUNP on. In Danger: UNAIDS Global AIDS Update 2022. *Danger UNAIDS Glob AIDS Updat 2022 [Internet]*. 2022; Available from: <https://www.unaids.org/en/resources/documents/2022/in-danger-global-aids-update>
20. Dziva Chikwari C, Dauya E, Bandason T, Tembo M, Mavodza C, Simms V, et al. The impact of community-based integrated HIV and sexual and reproductive health services for youth on population-level HIV viral load and sexually transmitted infections in Zimbabwe: protocol for the CHIEDZA cluster-randomised trial. *Wellcome Open Res*. 2022;7:54.
21. Reliefweb. ZIMBABWE: Worrying rise in STIs among young people - Zimbabwe | ReliefWeb [Internet]. [cited 2023 Sep 25]. Available from: <https://reliefweb.int/report/zimbabwe/zimbabwe-worrying-rise-stis-among-young->

- 1  
2  
3 people  
4  
5  
6 22. World Health Organization (WHO). AUDIT: The Alcohol Use Disorders Identification  
7 Test Guidelines for Use in Primary [Internet]. Vol. S e c o nd. 2001. 1–41 p. Available  
8 from: <https://www.who.int/publications/i/item/WHO-MSD-MSB-01.6a>  
9  
10  
11  
12  
13 23. Rabe-Hesketh S, Skrondal A. Multilevel modelling of complex survey data. *J R Stat Soc*  
14 *Ser A Stat Soc.* 2006;169(4):805–27.  
15  
16  
17 24. Johnson RW. Prevention and management of mental health conditions in Zimbabwe:  
18 The case for intervention. *Curr Hist.* 2022;106(700):233–4.  
19  
20  
21  
22 25. Rwafa C, Mangezi WO, Madhombiro M. Substance Use Among Patients Admitted to  
23 Psychiatric Units in Harare, Zimbabwe. *SSRN Electron J.* 2020;  
24  
25  
26  
27 26. Belete H, Mekonen T, Espinosa DC, Ambaw F, Connor J, Chan G, et al. Cannabis use in  
28 sub-Saharan Africa: A systematic review and meta-analysis. *Addiction.*  
29  
30  
31  
32 2023;118(7):1201–15.  
33  
34  
35 27. Francis JM, Grosskurth H, Changalucha J, Kapiga SH, Weiss HA. Systematic review and  
36 meta-analysis: Prevalence of alcohol use among young people in eastern Africa. *Trop*  
37  
38  
39  
40  
41  
42 28. UNODC. World Drug Report Executive Summary Policy Framework. Vienna, UNITED  
43  
44  
45  
46  
47  
48 29. Degenhardt L, Stockings E, Patton G, Hall WD, Lynskey M. The increasing global health  
49  
50  
51  
52  
53  
54  
55  
56  
57  
58  
59  
60
- priority of substance use in young people. *The Lancet Psychiatry* [Internet].  
2016;3(3):251–64. Available from: [http://dx.doi.org/10.1016/S2215-0366\(15\)00508-8](http://dx.doi.org/10.1016/S2215-0366(15)00508-8)
30. Ferreira-Borges C, Parry CDH, Babor TF. Harmful use of alcohol: A shadow over sub-  
Saharan Africa in need of workable solutions. *Int J Environ Res Public Health.*  
2017;14(4).

- 1  
2  
3  
4  
5  
6  
7  
8  
9  
10  
11  
12  
13  
14  
15  
16  
17  
18  
19  
20  
21  
22  
23  
24  
25  
26  
27  
28  
29  
30  
31  
32  
33  
34  
35  
36  
37  
38  
39  
40  
41  
42  
43  
44  
45  
46  
47  
48  
49  
50  
51  
52  
53  
54  
55  
56  
57  
58  
59  
60
31. Fentaw KD, Fenta SM, Biresaw HB. Prevalence and Associated Factors of Substance Use Male Population in East African Countries: A Multilevel Analysis of Recent Demographic and Health Surveys From 2015 to 2019. *Subst Abus Res Treat.* 2022;16.
  32. Pengpid S, Peltzer K, Ramlagan S. Prevalence and correlates of hazardous, harmful or dependent alcohol use and drug use amongs persons 15 years and older in South Africa: Results of a national survey in 2017. *African J Prim Heal Care Fam Med.* 2021;13(1):1–8.
  33. Equality EI for G. Health and risk behaviours are clearly gendered | European Institute for Gender Equality [Internet]. [cited 2023 Aug 2]. Available from: <https://eige.europa.eu/publications-resources/toolkits-guides/gender-equality-index-2021-report/health-and-risk-behaviours-are-clearly-gendered>
  34. UNODC. Global Overview : Drug Demand. World Drug Report 2. Global Overview: Drug Demand Drug Supply. 2022. 107 p.
  35. Mukwenha S, Murewanhema G, Madziva R, Dzinamarira T, Herrera H, Musuka G. Increased illicit substance use among Zimbabwean adolescents and youths during the COVID-19 era: an impending public health disaster. *Addiction.* 2022;117(4):1177–8.
  36. Blessing NM, Mhizha S, Wilson A, Nhunzvi C. Understanding the nature of substance use in Zimbabwe: State of the art and ways forward: A scoping review protocol. medRxiv [Internet]. 2022;2022.07.18.22277771. Available from: <https://www.medrxiv.org/content/10.1101/2022.07.18.22277771v1%0Ahttps://www.medrxiv.org/content/10.1101/2022.07.18.22277771v1.abstract>
  37. Muswerakuenda FF, Mundagowa PT, Madziwa C, Mukora-Mutseyekwa F. Access to psychosocial support for church-going young people recovering from drug and substance abuse in Zimbabwe: a qualitative study. *BMC Public Health.*

- 2023;23(1):723.
38. Redonnet B, Chollet A, Fombonne E, Bowes L, Melchior M. Tobacco, alcohol, cannabis and other illegal drug use among young adults: The socioeconomic context. *Drug Alcohol Depend.* 2012;121(3):231–9.
39. Kalichman SC, Simbayi LC, Kaufman M, Cain D, Jooste S. Alcohol use and sexual risks for HIV/AIDS in sub-saharan Africa: Systematic review of empirical findings. *Prev Sci.* 2007;8(2):141–51.
40. Hedden SL, Hulbert A, Cavanaugh CE, Parry CD, Moleko AG, Latimer WW. Alcohol, drug, and sexual risk behavior correlates of recent transactional sex among female black South African drug users. *J Subst Use.* 2011;16(1):57–67.
41. Doku D. Substance use and risky sexual behaviours among sexually experienced Ghanaian youth. *BMC Public Health.* 2012;12(1).
42. Magni S, Christofides N, Johnson S, Weiner R. Alcohol Use and Transactional Sex among Women in South Africa: Results from a Nationally Representative Survey. *PLoS One.* 2015;10(12):1–15.
43. Oppong Asante K, Meyer-Weitz A, Petersen I. Substance use and risky sexual behaviours among street connected children and youth in Accra, Ghana. *Subst Abuse Treat Prev Policy.* 2014;9:45.
44. Scott-Sheldon LAJ, Carey KB, Cunningham K, Johnson BT, Carey MP. Alcohol Use Predicts Sexual Decision-Making: A Systematic Review and Meta-Analysis of the Experimental Literature. *AIDS Behav [Internet].* 2016 Jan 1 [cited 2023 May 17];20(01):19. Available from: [/pmc/articles/PMC4683116/](https://pubmed.ncbi.nlm.nih.gov/264683116/)
45. Janson S, Nyenga L, Saleem H, Mayo-Wilson LJ, Mushy SE, Iseselo MK, et al. Residential and inpatient treatment of substance use disorders in Sub-Saharan Africa:



- 1  
2  
3 a scoping review. *Subst Abus Treat Prev Policy* [Internet]. 2024;19(1):1–12. Available  
4 from: <https://doi.org/10.1186/s13011-023-00589-0>  
5  
6  
7  
8 46. Oldfield BJ, Edelman EJ. Addressing Unhealthy Alcohol Use and the HIV Pre-exposure  
9 Prophylaxis Care Continuum in Primary Care: A Scoping Review. *AIDS Behav*  
10 [Internet]. 2021;25(6):1777–89. Available from: [https://doi.org/10.1007/s10461-020-](https://doi.org/10.1007/s10461-020-03107-6)  
11  
12  
13  
14  
15 03107-6  
16  
17 47. WHO,. WHO Implementation tool for pre-exposure prophylaxis (PrEP) of HIV  
18 infection. Module 1: Clinical. Geneva: World Health Organization; 2017  
19  
20 (WHO/HIV/2017.17). Licence: CC BY-NC-SA 3.0 IGO. Defin HIV [Internet]. 2019;(July).  
21  
22 Available from: <https://www.who.int/hiv/pub/prep/prep-supplement-jias-2015/en/>  
23  
24  
25  
26  
27  
28  
29  
30  
31

32 **Figure Legend:**

33 **Figure 1 – Participant recruitment flow chart**  
34  
35  
36  
37  
38  
39  
40  
41  
42  
43  
44  
45  
46  
47  
48  
49  
50  
51  
52  
53  
54  
55  
56  
57  
58  
59  
60

1  
2  
3  
4  
5  
6  
7  
8  
9  
10  
11  
12  
13  
14  
15  
16  
17  
18  
19  
20  
21  
22  
23  
24  
25  
26  
27  
28  
29  
30  
31  
32  
33  
34  
35  
36  
37  
38  
39  
40  
41  
42  
43  
44  
45  
46

For peer review only



Figure 1: Participants recruitment flow chart

## SUPPLEMENTARY TABLES

Supplementary Table 1: Sexual risk behaviours and HIV prevention uptake of participants against levels of substance and hazardous alcohol use by sex

| Variable                             | Male           |                                                |                                            |                                            |                                              | Female         |                                                |                                            |                                            |                                              |
|--------------------------------------|----------------|------------------------------------------------|--------------------------------------------|--------------------------------------------|----------------------------------------------|----------------|------------------------------------------------|--------------------------------------------|--------------------------------------------|----------------------------------------------|
|                                      | N <sup>s</sup> | No SU or HD<br>n <sup>s</sup> (%) <sup>†</sup> | SU only<br>n <sup>s</sup> (%) <sup>†</sup> | HD only<br>n <sup>s</sup> (%) <sup>†</sup> | HD and SU<br>n <sup>s</sup> (%) <sup>†</sup> | N <sup>s</sup> | No SU or HD<br>n <sup>s</sup> (%) <sup>†</sup> | SU only<br>n <sup>s</sup> (%) <sup>†</sup> | HD only<br>n <sup>s</sup> (%) <sup>†</sup> | HD and SU<br>n <sup>s</sup> (%) <sup>†</sup> |
| >1 sexual partner in past 12 months  |                |                                                |                                            |                                            |                                              |                |                                                |                                            |                                            |                                              |
| Yes                                  | 1861           | 1182(21.4)                                     | 357(43.8)                                  | 168(50.9)                                  | 154(61.1)                                    | 734            | 625(5.9)                                       | 40(33.8)                                   | 49(28.6)                                   | 20(42.4)                                     |
| No                                   | 4900           | 4225(78.6)                                     | 425(56.2)                                  | 151(49.1)                                  | 99(38.9)                                     | 9884           | 9645(94.1)                                     | 91(66.2)                                   | 120(71.4)                                  | 28(57.6)                                     |
| Transactional sex                    |                |                                                |                                            |                                            |                                              |                |                                                |                                            |                                            |                                              |
| Yes                                  | 202            | 104(1.9)                                       | 40(5.2)                                    | 23(6.6)                                    | 35(13.5)                                     | 179            | 144(1.4)                                       | 10(6.5)                                    | 17(9.9)                                    | 8(19.3)                                      |
| No                                   | 6682           | 5381(98.1)                                     | 768(94.8)                                  | 306(93.4)                                  | 227(86.5)                                    | 10522          | 6121(98.6)                                     | 123(93.5)                                  | 157(90.1)                                  | 43(80.7)                                     |
| Inconsistent condom use <sup>‡</sup> |                |                                                |                                            |                                            |                                              |                |                                                |                                            |                                            |                                              |
| No                                   | 2235           | 1613(59.8)                                     | 328(57.7)                                  | 170(60.0)                                  | 124(54.4)                                    | 1578           | 1469(23.2)                                     | 32(28.9)                                   | 60(42.5)                                   | 17(42.8)                                     |
| Yes                                  | 1494           | 1042(40.2)                                     | 247(42.3)                                  | 100(40.0)                                  | 105(45.6)                                    | 4961           | 4777(76.8)                                     | 68(71.1)                                   | 90(57.5)                                   | 26(57.2)                                     |
| Ever taken PrEP*                     |                |                                                |                                            |                                            |                                              |                |                                                |                                            |                                            |                                              |
| Yes                                  | 50             | 28(0.4)                                        | 9(1.0)                                     | 6(1.7)                                     | 7(2.6)                                       | 96             | 81(0.8)                                        | 3(1.9)                                     | 9(5.2)                                     | 3(7.8)                                       |
| No                                   | 6834           | 5457(99.6)                                     | 799(99.0)                                  | 323(98.3)                                  | 255(97.4)                                    | 10605          | 10262(99.2)                                    | 130(98.1)                                  | 165(94.8)                                  | 48(92.2)                                     |
| Ever taken HIV test                  |                |                                                |                                            |                                            |                                              |                |                                                |                                            |                                            |                                              |
| Yes                                  | 4157           | 3127(56.1)                                     | 563(69.5)                                  | 261(78.6)                                  | 206(78.0)                                    | 7935           | 7638(73.6)                                     | 108(78.3)                                  | 148(85.1)                                  | 41(82.7)                                     |
| No                                   | 2703           | 2335(43.9)                                     | 244(30.5)                                  | 68(21.4)                                   | 56(22.0)                                     | 2761           | 2700(26.4)                                     | 25(21.7)                                   | 26(14.9)                                   | 10(17.3)                                     |

†weighted percent, §unweighted count, ‡Only for participants who had ever had sexual intercourse

\*PrEP- Pre-exposure prophylaxis in the form of oral tenofovir 300mg/emtricitabine 200mg tablets

STROBE Statement—Checklist of items that should be included in reports of *cross-sectional studies*

|                           | Item No | Recommendation                                                                                                                                                                                    | Page No |
|---------------------------|---------|---------------------------------------------------------------------------------------------------------------------------------------------------------------------------------------------------|---------|
| <b>Title and abstract</b> | 1       | (a) Indicate the study's design with a commonly used term in the title or the abstract                                                                                                            | 2       |
|                           |         | (b) Provide in the abstract an informative and balanced summary of what was done and what was found                                                                                               | 2       |
| <b>Introduction</b>       |         |                                                                                                                                                                                                   |         |
| Background/rationale      | 2       | Explain the scientific background and rationale for the investigation being reported                                                                                                              | 5       |
| Objectives                | 3       | State specific objectives, including any prespecified hypotheses                                                                                                                                  | 5       |
| <b>Methods</b>            |         |                                                                                                                                                                                                   |         |
| Study design              | 4       | Present key elements of study design early in the paper                                                                                                                                           | 6       |
| Setting                   | 5       | Describe the setting, locations, and relevant dates, including periods of recruitment, exposure, follow-up, and data collection                                                                   | 6       |
| Participants              | 6       | (a) Give the eligibility criteria, and the sources and methods of selection of participants                                                                                                       | 6       |
| Variables                 | 7       | Clearly define all outcomes, exposures, predictors, potential confounders, and effect modifiers. Give diagnostic criteria, if applicable                                                          | 7       |
| Data sources/measurement  | 8*      | For each variable of interest, give sources of data and details of methods of assessment (measurement). Describe comparability of assessment methods if there is more than one group              | 6-7     |
| Bias                      | 9       | Describe any efforts to address potential sources of bias                                                                                                                                         | n/a     |
| Study size                | 10      | Explain how the study size was arrived at                                                                                                                                                         | n/a     |
| Quantitative variables    | 11      | Explain how quantitative variables were handled in the analyses. If applicable, describe which groupings were chosen and why                                                                      | 6-7     |
| Statistical methods       | 12      | (a) Describe all statistical methods, including those used to control for confounding                                                                                                             | 8       |
|                           |         | (b) Describe any methods used to examine subgroups and interactions                                                                                                                               | 8       |
|                           |         | (c) Explain how missing data were addressed                                                                                                                                                       | 9       |
|                           |         | (d) If applicable, describe analytical methods taking account of sampling strategy                                                                                                                | 8       |
|                           |         | (e) Describe any sensitivity analyses                                                                                                                                                             | n/a     |
| <b>Results</b>            |         |                                                                                                                                                                                                   |         |
| Participants              | 13*     | (a) Report numbers of individuals at each stage of study—eg numbers potentially eligible, examined for eligibility, confirmed eligible, included in the study, completing follow-up, and analysed | 9       |
|                           |         | (b) Give reasons for non-participation at each stage                                                                                                                                              | 9       |
|                           |         | (c) Consider use of a flow diagram                                                                                                                                                                | 9       |
| Descriptive data          | 14*     | (a) Give characteristics of study participants (eg demographic, clinical, social) and information on exposures and potential confounders                                                          | 9       |
|                           |         | (b) Indicate number of participants with missing data for each variable of interest                                                                                                               | 9       |
| Outcome data              | 15*     | Report numbers of outcome events or summary measures                                                                                                                                              | 11-13   |

|    |                          |    |                                                                                                                                                                                                              |
|----|--------------------------|----|--------------------------------------------------------------------------------------------------------------------------------------------------------------------------------------------------------------|
| 1  |                          |    |                                                                                                                                                                                                              |
| 2  | Main results             | 16 | (a) Give unadjusted estimates and, if applicable, confounder-adjusted estimates and their precision (eg, 95% confidence interval). Make clear which confounders were adjusted for and why they were included |
| 3  |                          |    | 13-                                                                                                                                                                                                          |
| 4  |                          |    | 14                                                                                                                                                                                                           |
| 5  |                          |    |                                                                                                                                                                                                              |
| 6  |                          |    | (b) Report category boundaries when continuous variables were categorized                                                                                                                                    |
| 7  |                          |    | n/a                                                                                                                                                                                                          |
| 8  |                          |    |                                                                                                                                                                                                              |
| 9  |                          |    | (c) If relevant, consider translating estimates of relative risk into absolute risk for a meaningful time period                                                                                             |
| 10 |                          |    | n/a                                                                                                                                                                                                          |
| 11 | Other analyses           | 17 | Report other analyses done—eg analyses of subgroups and interactions, and sensitivity analyses                                                                                                               |
| 12 |                          |    | n/a                                                                                                                                                                                                          |
| 13 |                          |    |                                                                                                                                                                                                              |
| 14 | <b>Discussion</b>        |    |                                                                                                                                                                                                              |
| 15 | Key results              | 18 | Summarise key results with reference to study objectives                                                                                                                                                     |
| 16 |                          |    | 15                                                                                                                                                                                                           |
| 17 | Limitations              | 19 | Discuss limitations of the study, taking into account sources of potential bias or imprecision. Discuss both direction and magnitude of any potential bias                                                   |
| 18 |                          |    | 18                                                                                                                                                                                                           |
| 19 |                          |    |                                                                                                                                                                                                              |
| 20 | Interpretation           | 20 | Give a cautious overall interpretation of results considering objectives, limitations, multiplicity of analyses, results from similar studies, and other relevant evidence                                   |
| 21 |                          |    | 15-                                                                                                                                                                                                          |
| 22 |                          |    | 19                                                                                                                                                                                                           |
| 23 |                          |    |                                                                                                                                                                                                              |
| 24 | Generalisability         | 21 | Discuss the generalisability (external validity) of the study results                                                                                                                                        |
| 25 |                          |    | 18                                                                                                                                                                                                           |
| 26 | <b>Other information</b> |    |                                                                                                                                                                                                              |
| 27 | Funding                  | 22 | Give the source of funding and the role of the funders for the present study and, if applicable, for the original study on which the present article is based                                                |
| 28 |                          |    | 20                                                                                                                                                                                                           |
| 29 |                          |    |                                                                                                                                                                                                              |
| 30 |                          |    |                                                                                                                                                                                                              |

\*Give information separately for exposed and unexposed groups.

**Note:** An Explanation and Elaboration article discusses each checklist item and gives methodological background and published examples of transparent reporting. The STROBE checklist is best used in conjunction with this article (freely available on the Web sites of PLoS Medicine at <http://www.plosmedicine.org/>, Annals of Internal Medicine at <http://www.annals.org/>, and Epidemiology at <http://www.epidem.com/>). Information on the STROBE Initiative is available at [www.strobe-statement.org](http://www.strobe-statement.org).

# BMJ Open

## Prevalence of substance and hazardous alcohol use and their association with risky sexual behaviour among youth: findings from a population-based survey in Zimbabwe

|                                 |                                                                                                                                                                                                                                                                                                                                                                                                                                                                                                                                                                                                                                                                                                                                                                                                                                                                                                                                                                                                                                                                                                                                                                                           |
|---------------------------------|-------------------------------------------------------------------------------------------------------------------------------------------------------------------------------------------------------------------------------------------------------------------------------------------------------------------------------------------------------------------------------------------------------------------------------------------------------------------------------------------------------------------------------------------------------------------------------------------------------------------------------------------------------------------------------------------------------------------------------------------------------------------------------------------------------------------------------------------------------------------------------------------------------------------------------------------------------------------------------------------------------------------------------------------------------------------------------------------------------------------------------------------------------------------------------------------|
| Journal:                        | <i>BMJ Open</i>                                                                                                                                                                                                                                                                                                                                                                                                                                                                                                                                                                                                                                                                                                                                                                                                                                                                                                                                                                                                                                                                                                                                                                           |
| Manuscript ID                   | bmjopen-2023-080993.R2                                                                                                                                                                                                                                                                                                                                                                                                                                                                                                                                                                                                                                                                                                                                                                                                                                                                                                                                                                                                                                                                                                                                                                    |
| Article Type:                   | Original research                                                                                                                                                                                                                                                                                                                                                                                                                                                                                                                                                                                                                                                                                                                                                                                                                                                                                                                                                                                                                                                                                                                                                                         |
| Date Submitted by the Author:   | 16-May-2024                                                                                                                                                                                                                                                                                                                                                                                                                                                                                                                                                                                                                                                                                                                                                                                                                                                                                                                                                                                                                                                                                                                                                                               |
| Complete List of Authors:       | HLAHLA, KUDZAI; Biomedical Research and Training Institute; University of Zimbabwe Faculty of Medicine and Health Sciences<br>Azizi, Steven Chifundo; Biomedical Research and Training Institute; London School of Hygiene & Tropical Medicine<br>Simms, Victoria; Biomedical Research and Training Institute; London School of Hygiene & Tropical Medicine<br>Dziva Chikwari, Chido; Biomedical Research and Training Institute; London School of Hygiene & Tropical Medicine<br>Dauya, E; Biomedical Research and Training Institute<br>Bandason , Tsitsi; Biomedical Research and Training Institute<br>Tembo, Mandikudza ; Biomedical Research and Training Institute; London School of Hygiene & Tropical Medicine<br>Mavodza, Constanca ; Biomedical Research and Training Institute; London School of Hygiene & Tropical Medicine, Department of Public Health, Environments and Society<br>Kranzer, Katharina; Biomedical Research and Training Institute; London School of Hygiene & Tropical Medicine, Clinical Research Department<br>Ferrand, Rashida; Biomedical Research and Training Institute; London School of Hygiene & Tropical Medicine, Clinical Research Department |
| <b>Primary Subject Heading</b>: | Addiction                                                                                                                                                                                                                                                                                                                                                                                                                                                                                                                                                                                                                                                                                                                                                                                                                                                                                                                                                                                                                                                                                                                                                                                 |
| Secondary Subject Heading:      | Addiction, HIV/AIDS, Public health, Sexual health                                                                                                                                                                                                                                                                                                                                                                                                                                                                                                                                                                                                                                                                                                                                                                                                                                                                                                                                                                                                                                                                                                                                         |
| Keywords:                       | Adolescents < Adolescent, Behavior, HIV & AIDS < INFECTIOUS DISEASES, Substance misuse < PSYCHIATRY, Risk Factors                                                                                                                                                                                                                                                                                                                                                                                                                                                                                                                                                                                                                                                                                                                                                                                                                                                                                                                                                                                                                                                                         |
|                                 |                                                                                                                                                                                                                                                                                                                                                                                                                                                                                                                                                                                                                                                                                                                                                                                                                                                                                                                                                                                                                                                                                                                                                                                           |

SCHOLARONE™  
Manuscripts



I, the Submitting Author has the right to grant and does grant on behalf of all authors of the Work (as defined in the below author licence), an exclusive licence and/or a non-exclusive licence for contributions from authors who are: i) UK Crown employees; ii) where BMJ has agreed a CC-BY licence shall apply, and/or iii) in accordance with the terms applicable for US Federal Government officers or employees acting as part of their official duties; on a worldwide, perpetual, irrevocable, royalty-free basis to BMJ Publishing Group Ltd ("BMJ") its licensees and where the relevant Journal is co-owned by BMJ to the co-owners of the Journal, to publish the Work in this journal and any other BMJ products and to exploit all rights, as set out in our [licence](#).

The Submitting Author accepts and understands that any supply made under these terms is made by BMJ to the Submitting Author unless you are acting as an employee on behalf of your employer or a postgraduate student of an affiliated institution which is paying any applicable article publishing charge ("APC") for Open Access articles. Where the Submitting Author wishes to make the Work available on an Open Access basis (and intends to pay the relevant APC), the terms of reuse of such Open Access shall be governed by a Creative Commons licence – details of these licences and which [Creative Commons](#) licence will apply to this Work are set out in our licence referred to above.

Other than as permitted in any relevant BMJ Author's Self Archiving Policies, I confirm this Work has not been accepted for publication elsewhere, is not being considered for publication elsewhere and does not duplicate material already published. I confirm all authors consent to publication of this Work and authorise the granting of this licence.



1  
2  
3  
4  
5  
6  
7  
8  
9  
10  
11  
12  
13  
14  
15  
16  
17  
18  
19  
20  
21  
22  
23  
24  
25  
26  
27  
28  
29  
30  
31  
32  
33  
34  
35  
36  
37  
38  
39  
40  
41  
42  
43  
44  
45  
46  
47  
48  
49  
50  
51  
52  
53  
54  
55  
56  
57  
58  
59  
60

## Prevalence of substance and hazardous alcohol use and their association with risky sexual behaviour among youth: findings from a population-based survey in Zimbabwe

Kudzai Hlahla<sup>1,2,\*</sup>, Steven Chifundo Azizi<sup>1,3,\*</sup>, Victoria Simms<sup>1,3</sup>, Chido Dziva Chikwari<sup>1,3</sup>, Ethel Dauya<sup>1</sup>, Tsitsi Bandason<sup>1</sup>, Mandikudza Tembo<sup>1,3</sup>, Constanica Vimbayi Mavodza<sup>1,4</sup>, Katharina Kranzer<sup>1,5,6</sup>, Rashida Abbas Ferrand<sup>1,5</sup>

1. Biomedical Research and Training Institute, Harare, Zimbabwe
2. Clinical Trials Research Centre, University of Zimbabwe Faculty of Medicine and Health Sciences, Harare Zimbabwe
3. MRC International Statistics and Epidemiology Group, London School of Hygiene & Tropical Medicine, London, UK
4. Department of Public Health, Environments and Society, Faculty of Public Health and Policy, London School of Hygiene & Tropical Medicine, London, UK
5. Clinical Research Department, London School of Hygiene & Tropical Medicine, London, UK
6. Division of Infectious Diseases and Tropical Medicine, Medical Center of the University of Munich, Munich, Germany

\* Equal first authors

### Email addresses of authors:

Kudzai Hlahla: [khlahla@uz-ctrc.org](mailto:khlahla@uz-ctrc.org)

Steven Azizi: [steve\\_aziz@hotmail.com](mailto:steve_aziz@hotmail.com)

Victoria Simms: [victoria.simms@lshtm.ac.uk](mailto:victoria.simms@lshtm.ac.uk)

Chido Dziva Chikwari: [Chido.DzivaChikwari@lshtm.ac.uk](mailto:Chido.DzivaChikwari@lshtm.ac.uk)

Ethel Dauya: [edauya@brti.co.zw](mailto:edauya@brti.co.zw)

Tsitsi Bandason: [tbandason@brti.co.zw](mailto:tbandason@brti.co.zw)

Mandikudza Tembo: [Mandikudza.Tembo@lshtm.ac.uk](mailto:Mandikudza.Tembo@lshtm.ac.uk)

Constancia Mavodza: [Constancia-Vimbayi.Mavodza@lshtm.ac.uk](mailto:Constancia-Vimbayi.Mavodza@lshtm.ac.uk)

Katharina Kranzer: [katharina.kranzer@lshtm.ac.uk](mailto:katharina.kranzer@lshtm.ac.uk)

Rashida Ferrand: [Rashida.Ferrand@lshtm.ac.uk](mailto:Rashida.Ferrand@lshtm.ac.uk)

### § Corresponding Author:

Rashida Ferrand

Biomedical Research and Training Institute

10, Seagrave Road,

Harare,

Zimbabwe

Email: [Rashida.Ferrand@lshtm.ac.uk](mailto:Rashida.Ferrand@lshtm.ac.uk)

## ABSTRACT

**Objectives:** Hazardous drinking (HD) and substance use (SU) can lead to disinhibited behaviour and are both growing public health problems among Southern African youths. We investigated the prevalence of SU and HD and their association with risky sexual behaviour among youth in Zimbabwe.

**Design:** A population-based survey conducted between October 2021 and June 2022.

**Setting:** 24 communities in three provinces in Zimbabwe

**Participants:** Youth aged 18-24 years living in randomly selected households.

**Outcome measures:** HD was defined as an AUDIT score  $\geq 8$ , SU was defined as ever use of  $\geq 1$  commonly used substances in the local setting.

**Results:** Of 17585 participants eligible for this analysis, 61% were female and the median age was 20 (IQR:19, 22) years. Overall, 4.5% and 7.0% of participants reported HD and SU respectively. Males had a substantially higher prevalence than females of HD (8.2% vs 1.9%) and SU (15.1% vs 1.5%). Among males, after adjusting for socio-demographic factors, we found increased odds of having  $>1$  sexual partner in those who engaged in SU (aOR=2.67, 95%CI=2.21-3.22), HD (aOR=3.40, 95%CI=2.71-4.26) and concurrent HD and SU (aOR=4.57, 95% CI=3.59-5.81) compared to those who did not engage in HD or SU. Similarly, there was increased odds of receiving/providing transactional sex among males who engaged in SU (aOR=2.51, 95%CI=1.68-3.74), HD (aOR=3.60, 95%CI=2.24-5.79), and concurrent HD and SU (aOR=7.74, 95%CI=5.44-11.0). Substance use was associated with 22% increased odds of inconsistent condom use in males (aOR=1.22, 95% CI=1.03-1.47). In females, the odds of having  $>1$  sexual partner and having transactional sex were also increased amongst those who engaged in SU and HD.

1  
2  
3 **Conclusion:** SU and HD are associated with sexual behaviours that increase the risk of HIV  
4 acquisition in youth. Sexual and reproductive health interventions must consider HD and SU  
5  
6 as potential drivers of risky sexual behaviour in youths.  
7  
8  
9

10  
11  
12  
13 **Keywords:** Substance use, hazardous alcohol, youth, HIV, Africa, sexual behavior  
14  
15  
16  
17  
18  
19  
20  
21  
22  
23  
24  
25  
26  
27  
28  
29  
30  
31  
32  
33  
34  
35  
36  
37  
38  
39  
40  
41  
42  
43  
44  
45  
46  
47  
48  
49  
50  
51  
52  
53  
54  
55  
56  
57  
58  
59  
60

### STRENGTHS AND LIMITATIONS OF THIS STUDY

- The study had a large sample size and was adequately powered to detect prevalence and associations measured.
- Participants were randomly selected, and participation rates were high, minimising selection bias.
- The cross-sectional nature of the study does not allow us to establish causality, or the temporality of associations observed.
- Use of self-reported measures may result in underreporting of alcohol and substance use, as well as risky sexual behaviours.
- The study was conducted in urban and peri-urban settings and is therefore not representative of rural settings.

## INTRODUCTION

Hazardous drinking (HD) and substance use (SU) are of increasing public health concern (1). Globally, an estimated 2.8 million deaths were attributed to alcohol use whilst 425,000 deaths were estimated to have been caused by SU between 1990 and 2016 (2). Alcohol is the most used substance globally while SU, defined as the use of illicit drugs such as opioids, cannabis, amphetamines, and cocaine is on the increase in Sub-Saharan Africa (SSA) (2–8). In 2016 Southern Africa had the second highest age-standardised burden of disease attributable to alcohol, after Eastern Europe (2). Current SU by adolescents in many countries has been reported to be higher than lifetime use in previous generations, with SU among adolescents and young people being predicted to increase in the African continent by 40% by 2030 (9).

Adolescence and young adulthood are periods of rapid physical, psychosocial and cognitive development due to the increasing complexity in brain development that occurs. Brain development during adolescence is characterised by slower development of the prefrontal cortex, that processes cognitive and emotional information such as prioritizing, planning, rational decision making and self-regulation(10). In contrast, there is rapid development of the limbic system that regulates emotions, sensation seeking and determining reward and punishment(10). This developmental disconnect in the brain is thought to result in experimentation and sensation seeking that may result in risk-taking behaviour during adolescence and young adulthood(10). Although an essential facet of cognitive development and maturity, such experimentation and risk-taking may include the hazardous use of alcohol and substances as well as sexual behaviour that increases an individual's risk of unintended pregnancy and transmission of sexually transmitted infections (STI) such as HIV (11,12). SU and HD impairs cognitive functioning in a variety of ways including causing impaired decision making, reduced risk perception and disinhibition (12–14). SU and HD may alter the

1  
2  
3 individual's perception of pleasure experienced from having sex under the influence of  
4  
5 intoxicating substances, as well as physically limit an individual's ability to think of and take  
6  
7 protective measures resulting in increased risk of contracting HIV and other sexually  
8  
9 transmitted infections (1,11,14).  
10  
11  
12  
13  
14

15 Studies conducted among adolescents and young adults have shown an association between  
16  
17 high alcohol consumption and use of illicit substances with risky sexual behaviour including  
18  
19 inconsistent condom use and having multiple sexual partners (15,16). However, most of these  
20  
21 studies have been conducted in high income countries in Europe, Asia, and the United States.  
22  
23  
24 On conducting a literature search, we found very few studies that have been conducted,  
25  
26 investigating HD, SU and its association with risky sexual behaviour within the African context,  
27  
28 with the few studies that we did find being done in specific populations such as orphans,  
29  
30 children and youth residing in the streets or in informal settlements (1,17,18). There is a  
31  
32 dearth of data on SU and HD among Zimbabwean youth specifically and to our knowledge,  
33  
34 there has been no study conducted to determine the prevalence of HD and SU on a  
35  
36 population-based level, and its association with risky sexual behaviour. The intersection  
37  
38 between SU and HD and sexual behaviours is of particular concern in Southern Africa, which  
39  
40 has the highest HIV prevalence of any global subregion (19). This study therefore aimed to  
41  
42 determine the prevalence of HD and SU and its association with sexual behaviour among  
43  
44 youth, a population at particularly high risk of HIV and STI, in Zimbabwe (20,21).  
45  
46  
47  
48  
49  
50  
51  
52  
53  
54  
55  
56  
57  
58  
59  
60

## **METHODS**

### **Study design and study setting**

This study used data from a population-based survey conducted to ascertain the outcome of a cluster-randomised trial (CHIEDZA) [Trial Registration number: NCT03719521]. The trial protocol has been published elsewhere (20). Briefly the CHIEDZA trial was conducted in three provinces (Harare, Bulawayo, and Mashonaland East), each with 8 clusters (defined as geographically demarcated areas) randomised 4:4 to either standard of care (existing facility-based health services) or the intervention which was integrated community based HIV and sexual and reproductive health service provision (20). The trial outcomes were ascertained through a cross-sectional population-based survey, conducted in Harare (October– December 2021), Bulawayo (January– March 2022) and Mashonaland East (April– June 2022) aiming to recruit 16,800 youths, aged 18-24 years (700 per cluster).

### **Survey methods**

A multi-stage sampling method was employed in the survey: buildings within each cluster were mapped using satellite images on Openstreetmap, and ARCGIS was used to segment streets into short sections (roughly 100-200 meters long). Selected street sections were randomly sampled, and all residents within these sections were listed. Individuals aged 18-24 years living in the mapped sections were invited to participate in the survey.

An interviewer-administered questionnaire collected socio-demographic data, participants' sexual behaviour, knowledge of and use of HIV prevention methods, mental health, and experience of violence. The Alcohol Use Disorders Identification Test (AUDIT) was used to screen for alcohol use disorder (22). This is a 10-item internationally validated tool developed

1  
2  
3 by the World Health Organization (WHO) and the most widely used alcohol screening  
4  
5 instrument globally. The frequency of use and range of substances commonly used in the local  
6  
7 setting was recorded. This questionnaire specified drugs by category, as drugs that are  
8  
9 smoked (e.g. weed, dagga, ganja), orally ingested (ganja cake or popcorn, prescription drugs  
10  
11 such as cough syrup), sniffed or inhaled (e.g. glue, cocaine) or injected (excluding medical  
12  
13 drugs like insulin).  
14  
15

16  
17 Survey data were collected onto encrypted and password-protected electronic tablets using  
18  
19 SurveyCTO (Cambridge, USA) and uploaded to a secure SurveyCTO server at the end of each  
20  
21 day. Data was downloaded and stored onto a password-controlled and secure Biomedical  
22  
23 Research and Training Institute (BRTI) Microsoft SQL Server and managed using Microsoft  
24  
25 Access as the front-end and with access limited to defined study personnel.  
26  
27  
28  
29  
30  
31

### 32 ***Explanatory and outcome variables***

33  
34 An AUDIT score of 8 was used as the cut off in accordance to WHO guidelines, with a score of  
35  
36 8 and above being indicative of HD and harmful alcohol use (22). Substance use was defined  
37  
38 as ever use of one or more of the substances listed above. The outcome was sexual risk  
39  
40 behaviour. Sexual risk behaviour was assessed using three self-reported indicators: (i)  
41  
42 condom use during vaginal and anal sex in the past 12 months (ii) having more than one sexual  
43  
44 partner in the past 12 months, and (iii) receiving or providing transactional sex as defined by  
45  
46 receiving or providing money or help to pay for their expenses or favour in order to enter or  
47  
48 remain in a sexual relationship in the past 12 months. The sociodemographic variables were  
49  
50 categorised as follows: Age was divided into two groups, 18-20 years and 21-24 years. Marital  
51  
52 status was categorised as 'never married' and 'ever married', distinguishing individuals based  
53  
54 on their marital history. The education level was defined by three ascending categories: 'up  
55  
56  
57  
58  
59  
60



1  
2  
3 to primary school', 'secondary school', and 'post-secondary school'. Employment status was  
4  
5 categorised as either 'in school or formal employment' or 'informal employment or  
6  
7 unemployed', differentiating individuals by their participation in structured employment or  
8  
9 education. Lastly, the wealth quintile ranked individuals into five levels from 'poorest' to  
10  
11 'richest', based on household assets. These quintiles were calculated using principal  
12  
13 components analysis (PCA) to assign weights to household assets (Fridge, bicycle, vehicle,  
14  
15 radio, microwave, cell phone and Computer or laptop or tablet). Each household was then  
16  
17 given a factor score that placed it on a continuous scale of relative wealth. These scores were  
18  
19 standardised to a mean of zero and a standard deviation of one and were used to divide the  
20  
21 sample into five equal parts, known as quintiles. These quintiles represented varying levels of  
22  
23 wealth, from the lowest (poorest) to the highest (richest).  
24  
25  
26  
27  
28  
29  
30  
31  
32

### 33 **Data analysis**

34  
35 Data analysis was performed using STATA version 17 (StatCorp, Texas, USA). The prevalence  
36  
37 of SU, HD and concurrent SU and HD among males and females was calculated. To assess the  
38  
39 effect of HD and SU on risky sexual behaviour, a forward-stepwise multivariable regression  
40  
41 analysis using a multi-level mixed-effects generalized linear model was used. This model was  
42  
43 selected due to the multistage sampling with stratification and unequal sampling probabilities  
44  
45 for the clusters because they had different numbers of youth residents (23). The analyses  
46  
47 were stratified by sex given the difference in prevalence of SU and HD. Data analysis was  
48  
49 conducted using the "meglm" command in STATA, which allows for the incorporation of  
50  
51 weights in the analysis and utilizes a pseudolikelihood approach to account for the inverse  
52  
53 probability weights. This method is known for providing robust standard errors when  
54  
55 sampling weights are present. Age group was considered an *a priori* confounder and the final  
56  
57  
58  
59  
60

1  
2  
3 models were adjusted for sociodemographic characteristics and trial arm as the intervention  
4  
5 could have had an effect on sexual behaviours.  
6  
7  
8  
9

### 10 **Patient and public involvement**

11  
12 The research question was informed by reports by health providers, local policy makers,  
13  
14 community members and community leaders of increasing levels of substance use,  
15  
16 particularly among youth. Youth were involved in the design and delivery of the CHIEDZA  
17  
18 intervention. The participant information video used for the informed consent process was  
19  
20 co-designed with youth, and the questionnaire was developed and piloted with youth.  
21  
22 Results of the CHIEDZA have been disseminated to study communities through multiple  
23  
24 community events. A detailed mixed methods process evaluation was embedded in the  
25  
26 CHIEDZA trial and data collection was undertaken by trained youth researchers.  
27  
28  
29  
30  
31  
32  
33  
34  
35  
36  
37  
38  
39

### 40 **Ethical considerations**

41 Ethical approval was obtained from the Medical Research Council of Zimbabwe (reference  
42  
43 number: MRCZ/A/2387), the Institutional Review Board of the Biomedical Research and  
44  
45 Training Institute (reference number: AP149/2018), and the London School of Hygiene &  
46  
47 Tropical Medicine (LSHTM) Research Ethics Committee (reference number: 12063).  
48  
49 Participants viewed an information video about the study (in either English, Shona or  
50  
51 Ndebele) on a tablet. Consent was documented electronically on a tablet, with participants  
52  
53 retaining a signed paper copy for their records (20).  
54  
55  
56  
57  
58  
59  
60

## RESULTS

A total of 17,683 participants were surveyed, with one participant excluded from data analysis due to being the only one with non-binary gender identification (and therefore not possible to categorize for analyses), 35 youths excluded due to missing data, and 62 with missing values on either SU or HD (see Fig 1). Overall, 17,585 participants were eligible for analysis (Fig 1). The median age of participants was 20 years (IQR: 19, 22) and 61% were female.

### Prevalence of HD and SU

Of the 17585 participants eligible for analysis, 15828 (90.3%) were non-substance users and non-hazardous drinkers. Overall, 816 participants were hazardous drinkers and 1,254 were substance users. The overall prevalence of HD was 4.5% (95% CI: 4.1, 4.9) and of SU was 7.0% (95%CI: 6.5, 7.6), with the prevalence of concurrent HD and SU being 1.8% (95% CI: 1.5, 2.0). Males (591) had a higher prevalence than females (225) of HD (8.2% vs 1.9%). Similarly, a higher proportion of males 1,070 (15.1%) were substance users compared to females 184 (1.5%). Concurrent HD and SU was reported by 262 (3.7%) males and 51 (0.4%) of females. Weed or Ganja was the most prevalent substance used in both men (14.5%) and women (1.06%), followed by swallowed drugs (1.67% in men vs 0.35% in women) and prescription drugs (1.65% in men vs 0.31% in women)

Among males, HD and SU was more common in older youth (21-24 years), ever married, in a higher wealth quintile and in those who were informally employed/unemployed compared to being in school or in formal employment (Table 1). In contrast, in females, HD and SU were more prevalent among those who were never married compared to those that had ever been married, in those who had a post-secondary school education, and in those who were in

1  
2  
3  
4  
5  
6  
7  
8  
9  
10  
11  
12  
13  
14  
15  
16  
17  
18  
19  
20  
21  
22  
23  
24  
25  
26  
27  
28  
29  
30  
31  
32  
33  
34  
35  
36  
37  
38  
39  
40  
41  
42  
43  
44  
45  
46  
47  
48  
49  
50  
51  
52  
53  
54  
55  
56  
57  
58  
59  
60

school or formal employment compared to those who were unemployed/informally employed (Table 2).

For peer review only

**Table 1: Substance and hazardous alcohol use of male participants against sociodemographic and economic characteristics of participants, by sex**

| Variable                          | Males          |                                   |                                   |                                   |                                 |
|-----------------------------------|----------------|-----------------------------------|-----------------------------------|-----------------------------------|---------------------------------|
|                                   | No SU or HD    | SU only                           | HD only                           | HD and SU                         |                                 |
|                                   | N <sup>§</sup> | n <sup>§</sup> (%) <sup>†</sup>   | n <sup>§</sup> (%) <sup>†</sup>   | n <sup>§</sup> (%) <sup>†</sup>   | n <sup>§</sup> (%) <sup>†</sup> |
| Total                             | 6884           | 5485 (80.4)<br>[95%CI:79.1, 81.7] | 808 (11.4)<br>[95%CI: 10.4, 12.4] | 329 (4.49)<br>[95%CI: 3.93, 5.13] | 262 (3.71) [95%CI: 3.22, 4.28]  |
| Age category in years             |                |                                   |                                   |                                   |                                 |
| 18-20                             | 3825           | 3231(84.8)                        | 381(9.7)                          | 121(3.2)                          | 92(2.3)                         |
| 21-24                             | 3059           | 2254(74.8)                        | 427(13.5)                         | 208(6.2)                          | 170(5.5)                        |
| Marital status                    |                |                                   |                                   |                                   |                                 |
| Never married                     | 6528           | 5242(81.0)                        | 759(11.3)                         | 292(4.2)                          | 235(3.5)                        |
| Ever married                      | 356            | 243(71.4)                         | 49(11.5)                          | 37(9.8)                           | 27(7.3)                         |
| Education level                   |                |                                   |                                   |                                   |                                 |
| Up to Primary school              | 248            | 190(76.0)                         | 32(12.6)                          | 12(4.8)                           | 14(6.6)                         |
| Secondary school                  | 6002           | 4790(80.8)                        | 713(11.4)                         | 274(4.2)                          | 225(3.6)                        |
| Post-secondary schooling          | 634            | 505(78.6)                         | 63(9.9)                           | 43(7.2)                           | 23(4.3)                         |
| Wealth quintile                   |                |                                   |                                   |                                   |                                 |
| Poorest                           | 1148           | 964(85.4)                         | 124(9.9)                          | 29(2.5)                           | 31(2.2)                         |
| Poorer                            | 1192           | 950(81.6)                         | 141(10.4)                         | 58(4.5)                           | 43(3.6)                         |
| Middle                            | 1443           | 1132(79.1)                        | 177(11.9)                         | 68(4.5)                           | 66(4.5)                         |
| Richer                            | 1462           | 1140(77.9)                        | 184(12.8)                         | 83(5.5)                           | 55(3.8)                         |
| Richest                           | 1635           | 1297(78.4)                        | 182(11.8)                         | 89(5.3)                           | 67(4.4)                         |
| Employment                        |                |                                   |                                   |                                   |                                 |
| In school or formal employment    | 2824           | 2386(84.5)                        | 247(8.8)                          | 117(4.0)                          | 74(2.7)                         |
| Informal employment or unemployed | 4060           | 3099(77.8)                        | 561(13.0)                         | 212(4.8)                          | 188(4.4)                        |

<sup>†</sup>weighted percent, <sup>§</sup>unweighted count

**Table 2: Substance and hazardous alcohol use of female participants against sociodemographic and economic characteristics of participants, by sex**

| Variable                          | Females        |                                     |                                   |                                   |                                 |
|-----------------------------------|----------------|-------------------------------------|-----------------------------------|-----------------------------------|---------------------------------|
|                                   |                | No SU or HD                         | SU only                           | HD only                           | HD and SU                       |
|                                   | N <sup>§</sup> | n <sup>§</sup> (%) <sup>†</sup>     | n <sup>§</sup> (%) <sup>†</sup>   | n <sup>§</sup> (%) <sup>†</sup>   | n <sup>§</sup> (%) <sup>†</sup> |
| Total                             | 10701          | 10343 (97.0)<br>[95%CI: 96.6, 97.3] | 133 (1.12)<br>[95%CI: 0.91, 1.37] | 174 (1.49)<br>[95%CI: 1.26, 1.77] | 51 (0.41) [95%CI: 0.30, 0.56]   |
| Age category in years             |                |                                     |                                   |                                   |                                 |
| 18-20                             | 5374           | 5213(97.3)                          | 67(1.2)                           | 66(1.1)                           | 28(0.4)                         |
| 21-24                             | 5327           | 5130(96.7)                          | 66 (1.0)                          | 108(1.9)                          | 23(0.4)                         |
| Marital status                    |                |                                     |                                   |                                   |                                 |
| Never married                     | 6712           | 6448(96.5)                          | 101(1.3)                          | 124(1.7)                          | 39(0.5)                         |
| Ever married                      | 3989           | 3895(97.7)                          | 32(0.8)                           | 50(1.2)                           | 12(0.3)                         |
| Education level                   |                |                                     |                                   |                                   |                                 |
| Up to Primary school              | 618            | 607(98.3)                           | 3(0.4)                            | 3(0.5)                            | 5(0.8)                          |
| Secondary school                  | 9317           | 9012(97.0)                          | 118(1.1)                          | 146(1.4)                          | 41(0.4)                         |
| Post-secondary schooling          | 766            | 724(95.0)                           | 12(1.4)                           | 25(3.1)                           | 5(0.5)                          |
| Wealth quintile                   |                |                                     |                                   |                                   |                                 |
| Poorest                           | 2499           | 2438(97.9)                          | 21(0.8)                           | 30(1.0)                           | 10(0.3)                         |
| Poorer                            | 2214           | 2150(97.3)                          | 20(0.9)                           | 37(1.6)                           | 7(0.3)                          |
| Middle                            | 2125           | 2065(97.4)                          | 22(0.9)                           | 30(1.4)                           | 8(0.3)                          |
| Richer                            | 1987           | 1914(96.5)                          | 27(1.3)                           | 36(1.7)                           | 10(0.5)                         |
| Richest                           | 1860           | 1763(95.2)                          | 42(2.1)                           | 40(2.0)                           | 15(0.7)                         |
| Employment                        |                |                                     |                                   |                                   |                                 |
| In school or formal employment    | 2934           | 2815(96.5)                          | 49(1.5)                           | 56(1.7)                           | 14(0.3)                         |
| Informal employment or unemployed | 7767           | 7528(97.2)                          | 84 (1.0)                          | 118 (1.4)                         | 37 (0.4)                        |

<sup>†</sup>weighted percent, <sup>§</sup>unweighted count

### Prevalence of risky sexual behaviour in people reporting HD and/or SU

Sexual behaviour of male and female hazardous drinkers and substance users are shown in Supplementary Table 1. Among males, a higher proportion of those who engaged in HD (50.9%), SU (43.8%) and concurrent HD and SU (61.1%) had had more than one sexual partner in the past 12 months compared to those who did not engage in HD or SU (21.4%). Similarly, a higher proportion of males who engaged in HD (6.6%), SU (5.2%) or concurrent SU and HD (13.5%) had received or given transactional sex compared to those who had neither reported HD or SU (1.9%) (Supplementary Table 1). A similar trend was seen among female participants despite the small numbers of females who reported HD, SU and HD and SU.

1  
2  
3 While a lower proportion of sexually active males who engaged in HD and SU used condoms  
4  
5 consistently, the opposite was observed among females, with a higher proportion of female  
6  
7 hazardous drinkers or substance users reporting consistent condom use. Females who  
8  
9 engaged in HD (42.5%), SU (28.9%) and both HD and SU (42.8%) reported consistent condom  
10  
11 use compared to non-hazardous drinkers and substance users (23.2%).  
12  
13  
14  
15  
16  
17

### 18 **Association of hazardous drinking and substance use with sexual behaviour.**

19  
20 Both males and females who engaged in HD and SU had significantly higher odds of having  
21  
22 had more than one sexual partner in the past 12 months and engaging in transactional sex  
23  
24 (Tables 3a and b). In males, after adjusting for socio-demographic factors, there was increased  
25  
26 odds of having >1 sexual partner amongst hazardous drinkers (aOR=3.39, 95%CI=2.70-4.26),  
27  
28 substance users (aOR=2.67, 95%CI=2.21-3.23) and amongst those that did both (aOR=4.57,  
29  
30 95%CI=3.59-5.81) compared to non-hazardous drinkers and substance users. In addition,  
31  
32 when comparing to males who did not engage in HD or SU, there was an increased odds of  
33  
34 receiving/providing transactional sex among hazardous drinkers (aOR=3.62, 95%CI=2.26-  
35  
36 5.79), substance users (aOR=2.49, 95%CI=1.67-3.73) and concurrent hazardous drinkers and  
37  
38 substance users (aOR=7.72, 95%CI=5.42-11.01).  
39  
40  
41  
42  
43  
44  
45  
46  
47  
48  
49  
50  
51  
52  
53  
54  
55  
56  
57  
58  
59  
60



**Table 3a: Association of substance use and hazardous alcohol drinking with sexual risk behaviours in male participants**

| Variable                                            | Sexual risk behaviours                                                            |         |                                                      |         |                                                               |         |
|-----------------------------------------------------|-----------------------------------------------------------------------------------|---------|------------------------------------------------------|---------|---------------------------------------------------------------|---------|
|                                                     | More than one sexual partners<br>in past 12 month (Yes)<br>(N <sup>§</sup> =6761) |         | Transactional sex<br>(Yes)<br>(N <sup>§</sup> =6880) |         | Inconsistent condom<br>use<br>(Yes)<br>(N <sup>§</sup> =3729) |         |
|                                                     | aOR <sup>†</sup> (95 CI%)                                                         | p-value | aOR <sup>‡</sup> (95 CI%)                            | p-value | aOR <sup>††</sup> (95 CI%)                                    | p-value |
| Non substance use and non hazardous alcohol drinker | Reference                                                                         |         | Reference                                            |         | Reference                                                     |         |
| Substance user only                                 | 2.67(2.21, 3.22)                                                                  | <0.001  | 2.51(1.68, 3.74)                                     | <0.001  | 1.22(1.03, 1.47)                                              | 0.024   |
| Hazardous alcohol drinker only                      | 3.40(2.71, 4.28)                                                                  | <0.001  | 3.60(2.24, 5.79)                                     | <0.001  | 0.84(0.57, 1.24)                                              | 0.376   |
| Both hazardous alcohol drinker and substance user   | 4.57(3.59, 5.81)                                                                  | <0.001  | 7.74(5.44, 11.0)                                     | <0.001  | 1.31(0.95, 1.82)                                              | 0.100   |

<sup>†</sup>Odds ratio adjusted for age group, marital status, education level, employment status, trial arm and province; <sup>‡</sup>odds ratio adjusted for age group, employment status, wealth quintile, trial arm and province; <sup>††</sup>odds ratio adjusted for age group, marital status, trial arm and employment status, <sup>§</sup>unweighted count,

**Table 3b: Association of substance use and hazardous alcohol drinking with sexual risk behaviours in female participants**

| Variable                                            | Sexual risk behaviours                                                             |         |                                                       |         |                                                               |         |
|-----------------------------------------------------|------------------------------------------------------------------------------------|---------|-------------------------------------------------------|---------|---------------------------------------------------------------|---------|
|                                                     | More than one sexual partners<br>in past 12 month (Yes)<br>(N <sup>§</sup> =10618) |         | Transactional sex<br>(Yes)<br>(N <sup>§</sup> =10701) |         | Inconsistent condom<br>use<br>(Yes)<br>(N <sup>§</sup> =6529) |         |
|                                                     | aOR <sup>†</sup> (95 CI%)                                                          | p-value | aOR <sup>‡</sup> (95 CI%)                             | p-value | aOR <sup>††</sup> (95 CI%)                                    | p-value |
| Non substance use and non hazardous alcohol drinker | Reference                                                                          |         | Reference                                             |         | Reference                                                     |         |
| Substance user only                                 | 6.92(4.39, 10.9)                                                                   | <0.001  | 6.62(3.42, 12.8)                                      | <0.001  | 1.16(0.67, 2.03)                                              | 0.589   |
| Hazardous alcohol drinker only                      | 5.61(3.54, 8.87)                                                                   | <0.001  | 7.87(4.48, 13.8)                                      | <0.001  | 0.72(0.53, 0.98)                                              | 0.038   |
| Both hazardous alcohol drinker and substance user   | 9.67(4.37, 21.4)                                                                   | <0.001  | 14.3(6.99, 29.1)                                      | <0.001  | 0.90(0.45, 1.79)                                              | 0.766   |

<sup>†</sup>Odds ratio adjusted for age group, marital status, employment status, education level, trial arm and province; <sup>‡</sup>odds ratio adjusted for age group, education level, employment status, trial arm and marital status; <sup>††</sup>odds ratio adjusted for age group, marital status, trial arm, education level, employment status, wealth quintile and province; <sup>§</sup>unweighted count

1  
2  
3  
4  
5  
6 In males but not females, substance use was associated with a 22% increased odds of  
7  
8 inconsistent condom use (aOR=1.22, 95% CI 1.03-1.47). However, in females, HD only was  
9  
10 associated with a 28% decreased odds of inconsistent condom use (aOR=0.72, 95% CI=0.53-  
11  
12 0.98).  
13  
14  
15  
16  
17

## 18 **DISCUSSION**

19  
20 In this population-based survey of Zimbabwean youth, the prevalence of HD, SU and  
21  
22 concurrent HD and SU was high, particularly in males who were older, in a higher wealth  
23  
24 quintile and informally or unemployed. HD and SU were associated with having more than  
25  
26 one sexual partner and having received or provided transactional sex in the past 12 months  
27  
28 in both males and females. SU was associated with inconsistent condom use in males whereas  
29  
30 HD in females was associated with consistent condom use.  
31  
32  
33  
34  
35  
36  
37

38 A systematic review of population based studies conducted between 2000-2016 in sub-  
39  
40 Saharan Africa reported a prevalence of lifetime use of any substance of 37% among  
41  
42 adolescents in Southern Africa (4). The considerable difference in SU prevalence between this  
43  
44 and that reported in our study could be attributed to the inclusion of caffeine as a  
45  
46 psychoactive substance in the systematic review, which is not usually the case in many studies  
47  
48 analysing SU. Cannabis was the most commonly used substance in this study, results that are  
49  
50 similar to other studies that have shown cannabis to be the most frequently used substance  
51  
52 in Zimbabwe and in the Southern African region (24–26). When considering hazardous  
53  
54 drinking, results from our study were higher than those found from a study conducted in  
55  
56 Eastern Africa in 2014, which showed a median prevalence of hazardous drinking of 3%  
57  
58  
59  
60

1  
2  
3 among young people 15-24 years of age(27). In Zimbabwe in 2016, the population prevalence  
4 of alcohol use disorders in those 15 years and older was reported to be 6.4% (24).  
5  
6  
7  
8  
9

10 Consistent with our study findings, alcohol and substance use has been reported to be more  
11 prevalent in males than females, with studies showing that current and ever use of substances  
12 can be more than three times higher in males than in females (28–32). Increased HD and SU  
13 in males has been attributed to males having increased access and opportunity to use alcohol  
14 and illicit substance use, cultural roles and expectations surrounding masculinity and alcohol  
15 use or SU and the tendency for men to take part in risky health behaviours such as HD and SU  
16 (29,31–33). It is important to note that the prevalence reported particularly among women,  
17 may be an underestimate due to the stigma attached to alcohol use and SU in this setting,  
18 which may have resulted in social desirability bias (31,34).  
19  
20  
21  
22  
23  
24  
25  
26  
27  
28  
29  
30  
31  
32  
33  
34

35 We found a higher prevalence of HD and SU in males that were in a higher wealth quintile  
36 and those who were either informally employed or unemployed compared to being in school  
37 or having formal employment. Men have a breadwinning role and the higher prevalence of  
38 HD and SU among young men may be a consequence of the lack of opportunities, financial  
39 instability and perceived hopelessness in a fragile economic environment with very high rates  
40 of unemployment particularly among young people (35–38). In addition, increased supply and  
41 access of substances caused by porous borders and potentially the COVID-19 pandemic that  
42 resulted in youths being anxious, depressed or unoccupied because of being away from  
43 school or work due to the lockdowns or loss of employment, may have contributed to HD and  
44 SU in Zimbabwean youths (35,37).  
45  
46  
47  
48  
49  
50  
51  
52  
53  
54  
55  
56  
57  
58  
59  
60

1  
2  
3 Interestingly, HD and SU although generally much less prevalent in women, were found to be  
4 more common in those who were in school or in formal employment. This may reflect  
5 women's ability to access these substances due to their ever-changing economic role in  
6 society that is brought about by education and formal employment, both which give women  
7 the financial means to access differing substances more readily (30).  
8  
9  
10  
11  
12  
13  
14  
15  
16  
17

18 HD and SU were associated with risky sexual behaviour, namely having multiple sexual  
19 partners and transactional sex. This finding is similar to that of other studies that found that  
20 heavy drinking and the use of cannabis and other illicit drugs is associated with an increased  
21 likelihood of having multiple sexual partners and having transactional sex in African youth  
22 (39–43). This may reflect a group that is generally more “risk-taking” and therefore more likely  
23 to engage in both substance use and risky sexual behaviour at this age. HD and SU may also  
24 influence sexual risk behaviour most likely through their disinhibiting effect, resulting in the  
25 inability to reason and make decisions (16,44).  
26  
27  
28  
29  
30  
31  
32  
33  
34  
35  
36  
37  
38  
39

40 Experimental alcohol use and SU as well as sexual behaviour tends to begin during  
41 adolescence and continues into young adulthood as young people gain autonomy and it is  
42 therefore a timely period to intervene to modify behaviours (12,29). Education programmes,  
43 highlighting the dangers of HD and SU, need to start as early as possible, targeting both  
44 children and adolescents with age-appropriate messaging. This could be integrated with  
45 comprehensive sexuality education with a focus on young men, who are a particularly  
46 important target group given that they are generally more likely to engage in higher risk  
47 behaviours.  
48  
49  
50  
51  
52  
53  
54  
55  
56  
57  
58  
59  
60

1  
2  
3 There is also a real scarcity of HD and SU treatment programmes in SSA, with many countries  
4 within the region lacking the capacity to meet the local demand for services(45). Our study  
5 adds to the growing body of literature highlighting the growing problem of HD and SU in  
6 Africa, particularly among young people. Effective and context-appropriate interventions to  
7 address SU and HD are urgently needed. Interventions need to be affordable and accessible  
8 to all, despite gender differences, offering quality services, free from risk of victimisation and  
9 related stigma (28,45). Context-specific research on the range of substances used, the  
10 patterns and drivers of alcohol and substance use and the context and culture of SU and HD  
11 among youth can inform interventions for both prevention and treatment of addiction.  
12  
13  
14  
15  
16  
17  
18  
19  
20  
21  
22  
23  
24  
25  
26  
27

28 Our study highlights the relationship between HD and SU and sexual behaviours and draws  
29 attention to both the need and opportunity for the integration of HD and SU screening in  
30 sexual reproductive health care services and as part of HIV prevention programmes. For  
31 example, when providing sexual health counselling, offering condoms, pre-exposure  
32 prophylaxis or HIV or STI testing, there is an opportunity to screen for and address SU (46,47).  
33 Similarly, it is important to address the sexual health of individuals being treated for HD or  
34 SU.  
35  
36  
37  
38  
39  
40  
41  
42  
43  
44  
45  
46  
47  
48  
49  
50  
51  
52  
53  
54  
55  
56  
57  
58  
59  
60

Our study has a number of strengths, namely the large sample size, and that the estimates  
were derived from a population-based survey. Participants were randomly selected, and  
participation rates were high, minimising selection bias. We acknowledge several limitations:  
due to its cross-sectional nature, we are unable to establish causality, or the temporality of  
associations observed. Use of self-reported measures may result in underreporting of alcohol  
and substance use, as well as risky sexual behaviours. The study was conducted in urban and

1  
2  
3 peri-urban settings and is therefore not representative of rural settings. In addition, we used  
4  
5 a broad measure of substance use, not taking into consideration the frequency or patterns of  
6  
7 substance use in analyses. Frequency and use of different substances (which may have  
8  
9 different effects) were considered a single category.  
10  
11  
12  
13  
14

## 15 **CONCLUSION**

16  
17 In conclusion, this study demonstrates an association between HD, SU and risky sexual  
18  
19 behaviour. There is an urgent need for evidence-based, age, gender and context-appropriate  
20  
21 preventive and treatment interventions targeting HD, SU and sexual behaviour. Importantly  
22  
23 addressing SU and HD should be a core aspect of the HIV prevention toolkit and sexual health  
24  
25 should be integrated within management of SU and HD.  
26  
27  
28  
29  
30  
31  
32  
33  
34  
35  
36  
37  
38  
39  
40  
41  
42  
43  
44  
45  
46  
47  
48  
49  
50  
51  
52  
53  
54  
55  
56  
57  
58  
59  
60

**Availability of data and materials**

The datasets used and/or analysed during the current study are available from the corresponding author on request.

**Authors' contributions**

Kudzai Hlahla conceptualised and is the lead investigator and author of this publication. Steven Azizi and Victoria Simms analysed the data. Rashida Ferrand is the Principal Investigator of the CHIEDZA Trial. Tsitsi Bandason was responsible for data management. Rashida Ferrand, Chido Dziva Chikwari, Ethel Dauya, Mandikudza Tembo, Constanca Mavodza and Katharina Kranzer contributed to the coordination of the study and critical revisions of the manuscript. All authors read and approved the final manuscript.

**Competing interests**

No competing interests.

**Acknowledgements**

The abstract from this paper was presented at INTEREST 2023 in Maputo Mozambique as poster number 113.

The authors would also like to thank all the participants in the study.

**Funding**

The CHIEDZA study was funded by the Wellcome Trust through a Senior Fellowship to RAF (206316/Z/17/Z)

**REFERENCES**

1. Ssekamatte T, Nalugya A, Mugambe RK, Wagaba B, Nakalembe D, Mutebi A, et al. Prevalence and predictors of sex under the influence of psychoactive substances among young people in informal settlements in Kampala, Uganda. *BMC Public Health*. 2023;23(1):801.
2. Degenhardt L, Charlson F, Ferrari A, Santomauro D, Erskine H, Mantilla-Herrara A, et al. The global burden of disease attributable to alcohol and drug use in 195 countries and territories, 1990–2016: a systematic analysis for the Global Burden of Disease Study 2016. *The Lancet Psychiatry*. 2018;5(12):987–1012.
3. Boua PR, Soo CC, Debpuur C, Maposa I, Nkoana S, Mohamed SF, et al. Prevalence and socio-demographic correlates of tobacco and alcohol use in four sub-Saharan African countries: a cross-sectional study of middle-aged adults. *BMC Public Health*. 2021;21(1):1–14.
4. Olawole-Isaac A, Ogundipe O, Amoo EO, Adeloye D. Substance use among adolescents in sub-Saharan Africa: A systematic review and meta-analysis. *SAJCH South African J Child Heal*. 2018;12(Special Issue):S79–84.
5. World Health Organization. Alcohol | WHO | Regional Office for Africa [Internet]. 2010 [cited 2023 Mar 23]. Available from: <https://www.afro.who.int/health-topics/alcohol>
6. WHO Africa. Substance Abuse | WHO | Regional Office for Africa [Internet]. World Health Organization. 2021 [cited 2023 Mar 23]. Available from: <https://www.afro.who.int/health-topics/substance-abuse>



- 1  
2  
3 7. Morojele NK, Ramsoomar L, Dumbili EW, Kapiga S. Adolescent Health Series –  
4 Alcohol, tobacco, and other drug use among adolescents in sub-Saharan Africa: A  
5 narrative review. *Trop Med Int Heal*. 2021;26(12):1528–38.  
6  
7
- 8  
9  
10 8. Jumbe S, Mwenda-Kamninga T, Mwalwimba I, Kalu U-G. Determinants and Effects of  
11 Adolescent Substance Use in Africa: A Systematic Review Protocol. 2020;1–6.  
12
- 13  
14  
15 9. UNODC World Drug Report 2. Global Overview: Drug Demand Drug Supply. Global  
16 Overview : Drug Demand. World Drug Report 2. Global Overview: Drug Demand Drug  
17 Supply. 2022. 107 p.  
18  
19
- 20  
21  
22 10. Lang D. Individual and Family Development, Health, and Well-being. *Individ Fam Dev*  
23 Heal Well-being [Internet]. 2022; Available from:  
24 <https://iastate.pressbooks.pub/individualfamilydevelopment/>  
25  
26  
27
- 28  
29  
30 11. Schantz K. Substance Use and Sexual Risk Taking in Adolescence Risk taking in  
31 adolescence Adolescence: A time for taking chances. 2012;(July):1–9. Available from:  
32 [http://www.actforyouth.net/resources/rf/rf\\_substance\\_0712.pdf](http://www.actforyouth.net/resources/rf/rf_substance_0712.pdf)  
33  
34  
35
- 36  
37  
38 12. Viner RM, Allen NB, Patton GC. Puberty, Developmental Processes, and Health  
39 Interventions. *Dis Control Priorities, Third Ed (Volume 8) Child Adolesc Heal Dev*  
40 [Internet]. 2017 Nov 20 [cited 2022 Oct 20];107–18. Available from:  
41 <https://pubmed.ncbi.nlm.nih.gov/30212144/>  
42  
43  
44
- 45  
46  
47 13. Steele CM, Josephs RA. Alcohol Myopia: Its Prized and Dangerous Effects. *Am Psychol*.  
48 1990;45(8):921–33.  
49
- 50  
51  
52 14. Brook DW, Brook JS, Pahl T, Montoya I. The longitudinal relationship between drug  
53 use and risky sexual behaviors among Colombian adolescents. *Arch Pediatr Adolesc*  
54 *Med*. 2002;156(11):1101–7.  
55  
56  
57
- 58  
59  
60 15. Cho HS, Yang Y. Relationship Between Alcohol Consumption and Risky Sexual

- Behaviors Among Adolescents and Young Adults: A Meta-Analysis. *Int J Public Health*. 2023;68(April).
16. Ritchwood TD, Ford H, DeCoster J, Lochman JE, Sutton M. Risky sexual behavior and substance use among adolescents: A meta-analysis. *Child Youth Serv Rev [Internet]*. 2015;52:74–88. Available from: <http://dx.doi.org/10.1016/j.chilyouth.2015.03.005>
17. Pufall EL, Eaton JW, Robertson L, Mushati P, Nyamukapa C, Gregson S. Education, substance use, and HIV risk among orphaned adolescents in Eastern Zimbabwe. *Vulnerable Child Youth Stud [Internet]*. 2017;12(4):360–74. Available from: <https://doi.org/10.1080/17450128.2017.1332398>
18. Oppong Asante K, Meyer-Weitz A, Petersen I, Asante KO, Meyer-Weitz A, Petersen I. Substance use and risky sexual behaviours among street connected children and youth in Accra, Ghana. *Subst Abuse Treat Prev Policy*. 2014;9:45.
19. HIV/AIDS JUNP on. In Danger: UNAIDS Global AIDS Update 2022. *Danger UNAIDS Glob AIDS Updat 2022 [Internet]*. 2022; Available from: <https://www.unaids.org/en/resources/documents/2022/in-danger-global-aids-update>
20. Dziva Chikwari C, Dauya E, Bandason T, Tembo M, Mavodza C, Simms V, et al. The impact of community-based integrated HIV and sexual and reproductive health services for youth on population-level HIV viral load and sexually transmitted infections in Zimbabwe: protocol for the CHIEDZA cluster-randomised trial. *Wellcome Open Res*. 2022;7:54.
21. Reliefweb. ZIMBABWE: Worrying rise in STIs among young people - Zimbabwe | ReliefWeb [Internet]. [cited 2023 Sep 25]. Available from: <https://reliefweb.int/report/zimbabwe/zimbabwe-worrying-rise-stis-among-young->

- 1  
2  
3 people  
4  
5  
6 22. World Health Organization (WHO). AUDIT: The Alcohol Use Disorders Identification  
7 Test Guidelines for Use in Primary [Internet]. Vol. S e c o n d. 2001. 1–41 p. Available  
8 from: <https://www.who.int/publications/i/item/WHO-MSD-MSB-01.6a>  
9  
10  
11  
12  
13 23. Rabe-Hesketh S, Skrondal A. Multilevel modelling of complex survey data. *J R Stat Soc*  
14 *Ser A Stat Soc.* 2006;169(4):805–27.  
15  
16  
17 24. Johnson RW. Prevention and management of mental health conditions in Zimbabwe:  
18 The case for intervention. *Curr Hist.* 2022;106(700):233–4.  
19  
20  
21  
22 25. Rwafa C, Mangezi WO, Madhombiro M. Substance Use Among Patients Admitted to  
23 Psychiatric Units in Harare, Zimbabwe. *SSRN Electron J.* 2020;  
24  
25  
26  
27 26. Belete H, Mekonen T, Espinosa DC, Ambaw F, Connor J, Chan G, et al. Cannabis use in  
28 sub-Saharan Africa: A systematic review and meta-analysis. *Addiction.*  
29  
30  
31  
32 2023;118(7):1201–15.  
33  
34  
35 27. Francis JM, Grosskurth H, Changalucha J, Kapiga SH, Weiss HA. Systematic review and  
36 meta-analysis: Prevalence of alcohol use among young people in eastern Africa. *Trop*  
37  
38  
39  
40  
41  
42 28. UNODC. World Drug Report Executive Summary Policy Framework. Vienna, UNITED  
43  
44  
45  
46  
47  
48 29. Degenhardt L, Stockings E, Patton G, Hall WD, Lynskey M. The increasing global health  
49  
50  
51  
52  
53  
54  
55  
56  
57  
58  
59  
60
- priority of substance use in young people. *The Lancet Psychiatry* [Internet].  
2016;3(3):251–64. Available from: [http://dx.doi.org/10.1016/S2215-0366\(15\)00508-8](http://dx.doi.org/10.1016/S2215-0366(15)00508-8)  
2017;14(4).  
30. Ferreira-Borges C, Parry CDH, Babor TF. Harmful use of alcohol: A shadow over sub-  
Saharan Africa in need of workable solutions. *Int J Environ Res Public Health.*  
2017;14(4).

- 1  
2  
3 31. Fentaw KD, Fenta SM, Biresaw HB. Prevalence and Associated Factors of Substance  
4 Use Male Population in East African Countries: A Multilevel Analysis of Recent  
5  
6 Demographic and Health Surveys From 2015 to 2019. *Subst Abus Res Treat*. 2022;16.  
7  
8  
9  
10 32. Pengpid S, Peltzer K, Ramlagan S. Prevalence and correlates of hazardous, harmful or  
11 dependent alcohol use and drug use amongs persons 15 years and older in South  
12  
13 Africa: Results of a national survey in 2017. *African J Prim Heal Care Fam Med*.  
14  
15 2021;13(1):1–8.  
16  
17  
18  
19  
20 33. Equality EI for G. Health and risk behaviours are clearly gendered | European Institute  
21 for Gender Equality [Internet]. [cited 2023 Aug 2]. Available from:  
22  
23 [https://eige.europa.eu/publications-resources/toolkits-guides/gender-equality-index-](https://eige.europa.eu/publications-resources/toolkits-guides/gender-equality-index-2021-report/health-and-risk-behaviours-are-clearly-gendered)  
24  
25 [2021-report/health-and-risk-behaviours-are-clearly-gendered](https://eige.europa.eu/publications-resources/toolkits-guides/gender-equality-index-2021-report/health-and-risk-behaviours-are-clearly-gendered)  
26  
27  
28  
29  
30 34. UNODC. Global Overview : Drug Demand. World Drug Report 2. Global Overview:  
31 Drug Demand Drug Supply. 2022. 107 p.  
32  
33  
34  
35 35. Mukwenha S, Murewanhema G, Madziva R, Dzinamarira T, Herrera H, Musuka G.  
36 Increased illicit substance use among Zimbabwean adolescents and youths during the  
37  
38 COVID-19 era: an impending public health disaster. *Addiction*. 2022;117(4):1177–8.  
39  
40  
41  
42 36. Blessing NM, Mhizha S, Wilson A, Nhunzvi C. Understanding the nature of substance  
43 use in Zimbabwe: State of the art and ways forward: A scoping review protocol.  
44  
45 medRxiv [Internet]. 2022;2022.07.18.22277771. Available from:  
46  
47 [https://www.medrxiv.org/content/10.1101/2022.07.18.22277771v1%0Ahttps://ww](https://www.medrxiv.org/content/10.1101/2022.07.18.22277771v1%0Ahttps://www.medrxiv.org/content/10.1101/2022.07.18.22277771v1.abstract)  
48  
49  
50  
51  
52  
53  
54 37. Muswerakuenda FF, Mundagowa PT, Madziwa C, Mukora-Mutseyekwa F. Access to  
55 psychosocial support for church-going young people recovering from drug and  
56  
57 substance abuse in Zimbabwe: a qualitative study. *BMC Public Health*.  
58  
59  
60

- 2023;23(1):723.
38. Redonnet B, Chollet A, Fombonne E, Bowes L, Melchior M. Tobacco, alcohol, cannabis and other illegal drug use among young adults: The socioeconomic context. *Drug Alcohol Depend.* 2012;121(3):231–9.
  39. Kalichman SC, Simbayi LC, Kaufman M, Cain D, Jooste S. Alcohol use and sexual risks for HIV/AIDS in sub-saharan Africa: Systematic review of empirical findings. *Prev Sci.* 2007;8(2):141–51.
  40. Hedden SL, Hulbert A, Cavanaugh CE, Parry CD, Moleko AG, Latimer WW. Alcohol, drug, and sexual risk behavior correlates of recent transactional sex among female black South African drug users. *J Subst Use.* 2011;16(1):57–67.
  41. Doku D. Substance use and risky sexual behaviours among sexually experienced Ghanaian youth. *BMC Public Health.* 2012;12(1).
  42. Magni S, Christofides N, Johnson S, Weiner R. Alcohol Use and Transactional Sex among Women in South Africa: Results from a Nationally Representative Survey. *PLoS One.* 2015;10(12):1–15.
  43. Oppong Asante K, Meyer-Weitz A, Petersen I. Substance use and risky sexual behaviours among street connected children and youth in Accra, Ghana. *Subst Abuse Treat Prev Policy.* 2014;9:45.
  44. Scott-Sheldon LAJ, Carey KB, Cunningham K, Johnson BT, Carey MP. Alcohol Use Predicts Sexual Decision-Making: A Systematic Review and Meta-Analysis of the Experimental Literature. *AIDS Behav [Internet].* 2016 Jan 1 [cited 2023 May 17];20(01):19. Available from: [/pmc/articles/PMC4683116/](https://pubmed.ncbi.nlm.nih.gov/264683116/)
  45. Janson S, Nyenga L, Saleem H, Mayo-Wilson LJ, Mushy SE, Iseselo MK, et al. Residential and inpatient treatment of substance use disorders in Sub-Saharan Africa:

- 1  
2  
3 a scoping review. *Subst Abus Treat Prev Policy* [Internet]. 2024;19(1):1–12. Available  
4 from: <https://doi.org/10.1186/s13011-023-00589-0>  
5  
6  
7  
8 46. Oldfield BJ, Edelman EJ. Addressing Unhealthy Alcohol Use and the HIV Pre-exposure  
9 Prophylaxis Care Continuum in Primary Care: A Scoping Review. *AIDS Behav*  
10 [Internet]. 2021;25(6):1777–89. Available from: [https://doi.org/10.1007/s10461-020-](https://doi.org/10.1007/s10461-020-03107-6)  
11  
12  
13  
14  
15 03107-6  
16  
17 47. WHO,. WHO Implementation tool for pre-exposure prophylaxis (PrEP) of HIV  
18 infection. Module 1: Clinical. Geneva: World Health Organization; 2017  
19  
20 (WHO/HIV/2017.17). Licence: CC BY-NC-SA 3.0 IGO. Defin HIV [Internet]. 2019;(July).  
21  
22 Available from: <https://www.who.int/hiv/pub/prep/prep-supplement-jias-2015/en/>  
23  
24  
25  
26  
27  
28  
29  
30  
31

32 **Figure Legend:**

33 **Figure 1 – Participant recruitment flow chart**  
34  
35  
36  
37  
38  
39  
40  
41  
42  
43  
44  
45  
46  
47  
48  
49  
50  
51  
52  
53  
54  
55  
56  
57  
58  
59  
60

1  
2  
3  
4  
5  
6  
7  
8  
9  
10  
11  
12  
13  
14  
15  
16  
17  
18  
19  
20  
21  
22  
23  
24  
25  
26  
27  
28  
29  
30  
31  
32  
33  
34  
35  
36  
37  
38  
39  
40  
41  
42  
43  
44  
45  
46

For peer review only



Figure 1: Participants recruitment flow chart



## SUPPLEMENTARY TABLES

Supplementary Table 1: Sexual risk behaviours and HIV prevention uptake of participants against levels of substance and hazardous alcohol use by sex

| Variable                             | Male           |                                                |                                            |                                            |                                              | Female         |                                                |                                            |                                            |                                              |
|--------------------------------------|----------------|------------------------------------------------|--------------------------------------------|--------------------------------------------|----------------------------------------------|----------------|------------------------------------------------|--------------------------------------------|--------------------------------------------|----------------------------------------------|
|                                      | N <sup>s</sup> | No SU or HD<br>n <sup>s</sup> (%) <sup>†</sup> | SU only<br>n <sup>s</sup> (%) <sup>†</sup> | HD only<br>n <sup>s</sup> (%) <sup>†</sup> | HD and SU<br>n <sup>s</sup> (%) <sup>†</sup> | N <sup>s</sup> | No SU or HD<br>n <sup>s</sup> (%) <sup>†</sup> | SU only<br>n <sup>s</sup> (%) <sup>†</sup> | HD only<br>n <sup>s</sup> (%) <sup>†</sup> | HD and SU<br>n <sup>s</sup> (%) <sup>†</sup> |
| >1 sexual partner in past 12 months  |                |                                                |                                            |                                            |                                              |                |                                                |                                            |                                            |                                              |
| Yes                                  | 1861           | 1182(21.4)                                     | 357(43.8)                                  | 168(50.9)                                  | 154(61.1)                                    | 734            | 625(5.9)                                       | 40(33.8)                                   | 49(28.6)                                   | 20(42.4)                                     |
| No                                   | 4900           | 4225(78.6)                                     | 425(56.2)                                  | 151(49.1)                                  | 99(38.9)                                     | 9884           | 9645(94.1)                                     | 91(66.2)                                   | 120(71.4)                                  | 28(57.6)                                     |
| Transactional sex                    |                |                                                |                                            |                                            |                                              |                |                                                |                                            |                                            |                                              |
| Yes                                  | 202            | 104(1.9)                                       | 40(5.2)                                    | 23(6.6)                                    | 35(13.5)                                     | 179            | 144(1.4)                                       | 10(6.5)                                    | 17(9.9)                                    | 8(19.3)                                      |
| No                                   | 6682           | 5381(98.1)                                     | 768(94.8)                                  | 306(93.4)                                  | 227(86.5)                                    | 10522          | 6121(98.6)                                     | 123(93.5)                                  | 157(90.1)                                  | 43(80.7)                                     |
| Inconsistent condom use <sup>‡</sup> |                |                                                |                                            |                                            |                                              |                |                                                |                                            |                                            |                                              |
| No                                   | 2235           | 1613(59.8)                                     | 328(57.7)                                  | 170(60.0)                                  | 124(54.4)                                    | 1578           | 1469(23.2)                                     | 32(28.9)                                   | 60(42.5)                                   | 17(42.8)                                     |
| Yes                                  | 1494           | 1042(40.2)                                     | 247(42.3)                                  | 100(40.0)                                  | 105(45.6)                                    | 4961           | 4777(76.8)                                     | 68(71.1)                                   | 90(57.5)                                   | 26(57.2)                                     |
| Ever taken PrEP*                     |                |                                                |                                            |                                            |                                              |                |                                                |                                            |                                            |                                              |
| Yes                                  | 50             | 28(0.4)                                        | 9(1.0)                                     | 6(1.7)                                     | 7(2.6)                                       | 96             | 81(0.8)                                        | 3(1.9)                                     | 9(5.2)                                     | 3(7.8)                                       |
| No                                   | 6834           | 5457(99.6)                                     | 799(99.0)                                  | 323(98.3)                                  | 255(97.4)                                    | 10605          | 10262(99.2)                                    | 130(98.1)                                  | 165(94.8)                                  | 48(92.2)                                     |
| Ever taken HIV test                  |                |                                                |                                            |                                            |                                              |                |                                                |                                            |                                            |                                              |
| Yes                                  | 4157           | 3127(56.1)                                     | 563(69.5)                                  | 261(78.6)                                  | 206(78.0)                                    | 7935           | 7638(73.6)                                     | 108(78.3)                                  | 148(85.1)                                  | 41(82.7)                                     |
| No                                   | 2703           | 2335(43.9)                                     | 244(30.5)                                  | 68(21.4)                                   | 56(22.0)                                     | 2761           | 2700(26.4)                                     | 25(21.7)                                   | 26(14.9)                                   | 10(17.3)                                     |

†weighted percent, §unweighted count, ‡Only for participants who had ever had sexual intercourse

\*PrEP- Pre-exposure prophylaxis in the form of oral tenofovir 300mg/emtricitabine 200mg tablets

STROBE Statement—Checklist of items that should be included in reports of *cross-sectional studies*

|                           | Item No | Recommendation                                                                                                                                                                                    | Page No |
|---------------------------|---------|---------------------------------------------------------------------------------------------------------------------------------------------------------------------------------------------------|---------|
| <b>Title and abstract</b> | 1       | (a) Indicate the study's design with a commonly used term in the title or the abstract                                                                                                            | 2       |
|                           |         | (b) Provide in the abstract an informative and balanced summary of what was done and what was found                                                                                               | 2       |
| <b>Introduction</b>       |         |                                                                                                                                                                                                   |         |
| Background/rationale      | 2       | Explain the scientific background and rationale for the investigation being reported                                                                                                              | 5       |
| Objectives                | 3       | State specific objectives, including any prespecified hypotheses                                                                                                                                  | 5       |
| <b>Methods</b>            |         |                                                                                                                                                                                                   |         |
| Study design              | 4       | Present key elements of study design early in the paper                                                                                                                                           | 6       |
| Setting                   | 5       | Describe the setting, locations, and relevant dates, including periods of recruitment, exposure, follow-up, and data collection                                                                   | 6       |
| Participants              | 6       | (a) Give the eligibility criteria, and the sources and methods of selection of participants                                                                                                       | 6       |
| Variables                 | 7       | Clearly define all outcomes, exposures, predictors, potential confounders, and effect modifiers. Give diagnostic criteria, if applicable                                                          | 7       |
| Data sources/measurement  | 8*      | For each variable of interest, give sources of data and details of methods of assessment (measurement). Describe comparability of assessment methods if there is more than one group              | 6-7     |
| Bias                      | 9       | Describe any efforts to address potential sources of bias                                                                                                                                         | n/a     |
| Study size                | 10      | Explain how the study size was arrived at                                                                                                                                                         | n/a     |
| Quantitative variables    | 11      | Explain how quantitative variables were handled in the analyses. If applicable, describe which groupings were chosen and why                                                                      | 6-7     |
| Statistical methods       | 12      | (a) Describe all statistical methods, including those used to control for confounding                                                                                                             | 8       |
|                           |         | (b) Describe any methods used to examine subgroups and interactions                                                                                                                               | 8       |
|                           |         | (c) Explain how missing data were addressed                                                                                                                                                       | 9       |
|                           |         | (d) If applicable, describe analytical methods taking account of sampling strategy                                                                                                                | 8       |
|                           |         | (e) Describe any sensitivity analyses                                                                                                                                                             | n/a     |
| <b>Results</b>            |         |                                                                                                                                                                                                   |         |
| Participants              | 13*     | (a) Report numbers of individuals at each stage of study—eg numbers potentially eligible, examined for eligibility, confirmed eligible, included in the study, completing follow-up, and analysed | 9       |
|                           |         | (b) Give reasons for non-participation at each stage                                                                                                                                              | 9       |
|                           |         | (c) Consider use of a flow diagram                                                                                                                                                                | 9       |
| Descriptive data          | 14*     | (a) Give characteristics of study participants (eg demographic, clinical, social) and information on exposures and potential confounders                                                          | 9       |
|                           |         | (b) Indicate number of participants with missing data for each variable of interest                                                                                                               | 9       |
| Outcome data              | 15*     | Report numbers of outcome events or summary measures                                                                                                                                              | 11-13   |

|    |                          |    |                                                                                                                                                                                                              |
|----|--------------------------|----|--------------------------------------------------------------------------------------------------------------------------------------------------------------------------------------------------------------|
| 1  |                          |    |                                                                                                                                                                                                              |
| 2  | Main results             | 16 | (a) Give unadjusted estimates and, if applicable, confounder-adjusted estimates and their precision (eg, 95% confidence interval). Make clear which confounders were adjusted for and why they were included |
| 3  |                          |    | 13-                                                                                                                                                                                                          |
| 4  |                          |    | 14                                                                                                                                                                                                           |
| 5  |                          |    |                                                                                                                                                                                                              |
| 6  |                          |    | (b) Report category boundaries when continuous variables were categorized                                                                                                                                    |
| 7  |                          |    | n/a                                                                                                                                                                                                          |
| 8  |                          |    |                                                                                                                                                                                                              |
| 9  |                          |    | (c) If relevant, consider translating estimates of relative risk into absolute risk for a meaningful time period                                                                                             |
| 10 |                          |    | n/a                                                                                                                                                                                                          |
| 11 | Other analyses           | 17 | Report other analyses done—eg analyses of subgroups and interactions, and sensitivity analyses                                                                                                               |
| 12 |                          |    | n/a                                                                                                                                                                                                          |
| 13 |                          |    |                                                                                                                                                                                                              |
| 14 | <b>Discussion</b>        |    |                                                                                                                                                                                                              |
| 15 | Key results              | 18 | Summarise key results with reference to study objectives                                                                                                                                                     |
| 16 |                          |    | 15                                                                                                                                                                                                           |
| 17 | Limitations              | 19 | Discuss limitations of the study, taking into account sources of potential bias or imprecision. Discuss both direction and magnitude of any potential bias                                                   |
| 18 |                          |    | 18                                                                                                                                                                                                           |
| 19 |                          |    |                                                                                                                                                                                                              |
| 20 | Interpretation           | 20 | Give a cautious overall interpretation of results considering objectives, limitations, multiplicity of analyses, results from similar studies, and other relevant evidence                                   |
| 21 |                          |    | 15-                                                                                                                                                                                                          |
| 22 |                          |    | 19                                                                                                                                                                                                           |
| 23 |                          |    |                                                                                                                                                                                                              |
| 24 | Generalisability         | 21 | Discuss the generalisability (external validity) of the study results                                                                                                                                        |
| 25 |                          |    | 18                                                                                                                                                                                                           |
| 26 | <b>Other information</b> |    |                                                                                                                                                                                                              |
| 27 | Funding                  | 22 | Give the source of funding and the role of the funders for the present study and, if applicable, for the original study on which the present article is based                                                |
| 28 |                          |    | 20                                                                                                                                                                                                           |
| 29 |                          |    |                                                                                                                                                                                                              |
| 30 |                          |    |                                                                                                                                                                                                              |

\*Give information separately for exposed and unexposed groups.

**Note:** An Explanation and Elaboration article discusses each checklist item and gives methodological background and published examples of transparent reporting. The STROBE checklist is best used in conjunction with this article (freely available on the Web sites of PLoS Medicine at <http://www.plosmedicine.org/>, Annals of Internal Medicine at <http://www.annals.org/>, and Epidemiology at <http://www.epidem.com/>). Information on the STROBE Initiative is available at [www.strobe-statement.org](http://www.strobe-statement.org).
