# Supplementary material for: Prevalence of substance and hazardous alcohol use and their association with risky sexual behaviour among youth: findings from a population-based survey in Zimbabwe
Source: PubMed Central journal article supplement (PMC11184200; doi:10.1136/bmjopen-2023-080993), 2024-06-16
Supplement: bmjopen-2023-080993supp001.pdf [file bmjopen-2023-080993supp001.pdf]

## SUPPLEMENTARY TABLES

Supplementary Table 1: Sexual risk behaviours and HIV prevention uptake of participants against levels of substance and hazardous alcohol use by sex

| Variable                             | Male           |                                 |                                 |                                 |                                 | Female         |                                 |                                 |                                 |                                 |
|--------------------------------------|----------------|---------------------------------|---------------------------------|---------------------------------|---------------------------------|----------------|---------------------------------|---------------------------------|---------------------------------|---------------------------------|
|                                      | N <sup>§</sup> | n <sup>§</sup> (%) <sup>†</sup> | n <sup>§</sup> (%) <sup>†</sup> | n <sup>§</sup> (%) <sup>†</sup> | n <sup>§</sup> (%) <sup>†</sup> | N <sup>§</sup> | n <sup>§</sup> (%) <sup>†</sup> | n <sup>§</sup> (%) <sup>†</sup> | n <sup>§</sup> (%) <sup>†</sup> | n <sup>§</sup> (%) <sup>†</sup> |
| >1 sexual partner in past 12 months  |                |                                 |                                 |                                 |                                 |                |                                 |                                 |                                 |                                 |
| Yes                                  | 1861           | 1182(21.4)                      | 357(43.8)                       | 168(50.9)                       | 154(61.1)                       | 734            | 625(5.9)                        | 40(33.8)                        | 49(28.6)                        | 20(42.4)                        |
| No                                   | 4900           | 4225(78.6)                      | 425(56.2)                       | 151(49.1)                       | 99(38.9)                        | 9884           | 9645(94.1)                      | 91(66.2)                        | 120(71.4)                       | 28(57.6)                        |
| Transactional sex                    |                |                                 |                                 |                                 |                                 |                |                                 |                                 |                                 |                                 |
| Yes                                  | 202            | 104(1.9)                        | 40(5.2)                         | 23(6.6)                         | 35(13.5)                        | 179            | 144(1.4)                        | 10(6.5)                         | 17(9.9)                         | 8(19.3)                         |
| No                                   | 6682           | 5381(98.1)                      | 768(94.8)                       | 306(93.4)                       | 227(86.5)                       | 10522          | 6121(98.6)                      | 123(93.5)                       | 157(90.1)                       | 43(80.7)                        |
| Inconsistent condom use <sup>‡</sup> |                |                                 |                                 |                                 |                                 |                |                                 |                                 |                                 |                                 |
| No                                   | 2235           | 1613(59.8)                      | 328(57.7)                       | 170(60.0)                       | 124(54.4)                       | 1578           | 1469(23.2)                      | 32(28.9)                        | 60(42.5)                        | 17(42.8)                        |
| Yes                                  | 1494           | 1042(40.2)                      | 247(42.3)                       | 100(40.0)                       | 105(45.6)                       | 4961           | 4777(76.8)                      | 68(71.1)                        | 90(57.5)                        | 26(57.2)                        |
| Ever taken PrEP <sup>*</sup>         |                |                                 |                                 |                                 |                                 |                |                                 |                                 |                                 |                                 |
| Yes                                  | 50             | 28(0.4)                         | 9(1.0)                          | 6(1.7)                          | 7(2.6)                          | 96             | 81(0.8)                         | 3(1.9)                          | 9(5.2)                          | 3(7.8)                          |
| No                                   | 6834           | 5457(99.6)                      | 799(99.0)                       | 323(98.3)                       | 255(97.4)                       | 10605          | 10262(99.2)                     | 130(98.1)                       | 165(94.8)                       | 48(92.2)                        |
| Ever taken HIV test                  |                |                                 |                                 |                                 |                                 |                |                                 |                                 |                                 |                                 |
| Yes                                  | 4157           | 3127(56.1)                      | 563(69.5)                       | 261(78.6)                       | 206(78.0)                       | 7935           | 7638(73.6)                      | 108(78.3)                       | 148(85.1)                       | 41(82.7)                        |
| No                                   | 2703           | 2335(43.9)                      | 244(30.5)                       | 68(21.4)                        | 56(22.0)                        | 2761           | 2700(26.4)                      | 25(21.7)                        | 26(14.9)                        | 10(17.3)                        |

<sup>†</sup>weighted percent, <sup>§</sup>unweighted count, <sup>‡</sup>Only for participants who had ever had sexual intercourse

<sup>\*</sup>PrEP- Pre-exposure prophylaxis in the form of oral tenofovir 300mg/emtricitabine 200mg tablets
